# Supplementary material for: Prospectively Quantifying the Propensity for Atrial Fibrillation: A Mechanistic Formulation
Source: PLoS One. 2015 Mar 13;10(3):e0118746. doi: 10.1371/journal.pone.0118746 (PMC4358999; doi:10.1371/journal.pone.0118746)
Supplement: S1 Table — (XLSX) [file pone.0118746.s002.xlsx]

## Sheet: Sheet 1
Parameter Dependency Experiment Tissue Characteristics
Tissue ID	Mean APD (ms)	R*C (ms)	Tissue Height (cells)	Tissue Width (cells)	Fibrillation Index* (ms^-2)	RC/APD Ratio	Reentrant Halflife (s)**	Mean Wave Population
ABL.1	80	10	50	50	0.015625	0.125	1.78196	3.65467
ABL.2	80	10	55	55	0.0171875	0.125	2.88831	5.14915
ABL.3	80	10	60	60	0.01875	0.125	4.57838	4.02431
ABL.4	80	10	65	65	0.0203125	0.125	9.04331	6.35515
ABL.5	80	10	70	70	0.021875	0.125	15.1917	6.9361
ABL.6	80	10	75	75	0.0234375	0.125	29.2112	7.88589
ABL.7	80	10	80	80	0.025	0.125	64.0412	8.53275
ABL.8	80	10	85	85	0.0265625	0.125	155.241	9.34712
ABL.9	80	10	90	90	0.028125	0.125	371.739	10.4348
ABL.10	80	10	95	95	0.0296875	0.125	992.983	11.2466
ABL.11	80	10	100	100	0.03125	0.125	2506.5	12.3318
APD.1	50	10	80	80	0.04	0.2	NA	21.0882
APD.2	55	10	80	80	0.0363636	0.181818	NA	17.4309
APD.3	60	10	80	80	0.0333333	0.166667	43949.4	14.4413
APD.4	65	10	80	80	0.0307692	0.153846	1578.24	12.1376
APD.5	70	10	80	80	0.0285714	0.142857	336.61	10.595
APD.6	75	10	80	80	0.0266667	0.133333	137.231	9.45538
APD.7	80	10	80	80	0.025	0.125	69.9391	8.54756
APD.8	85	10	80	80	0.0235294	0.117647	37.8343	7.92306
APD.9	90	10	80	80	0.0222222	0.111111	20.6595	7.13894
APD.10	95	10	80	80	0.0210526	0.105263	13.0096	6.47225
APD.11	100	10	80	80	0.02	0.1	7.21943	5.48913
RC.1	80	8	80	80	0.03125	0.1	565.47	7.53467
RC.2	80	9	80	80	0.0277778	0.1125	255.268	7.97054
RC.3	80	10	80	80	0.025	0.125	65.7706	8.67219
RC.4	80	11	80	80	0.0227273	0.1375	34.0522	8.99305
RC.5	80	12	80	80	0.0208333	0.15	12.7087	8.32775
RC.6	80	13	80	80	0.0192308	0.1625	7.19759	7.41671
RC.7	80	14	80	80	0.0178571	0.175	6.15835	7.53528
RC.8	80	15	80	80	0.0166667	0.1875	13.6204	7.92426
RC.9	80	16	80	80	0.015625	0.2	112.752	8.11976
					* Fibrillation index is calculated as Area/(Boundary Length * Resistance * Capacitance * APD)		**NA indicates that halflives could not be calculated because reentrant episodes exceeded computational limits

## Sheet: Sheet 2
Parameter Dependency Experiment Episode Durations (Reported in ms)
	Tissue Number
Episode Number	ABL.1	ABL.2	ABL.3	ABL.4	ABL.5	ABL.6	ABL.7	ABL.8	ABL.9	ABL.10	ABL.11	APD.1	APD.2	APD.3	APD.4	APD.5	APD.6	APD.7	APD.8	APD.9	APD.10	APD.11	RC.1	RC.2	RC.3	RC.4	RC.5	RC.6	RC.7	RC.8	RC.9
1	1779	2794	2422	9806	6218	23541	44194	228544	6791	977634	1482719	10000000	10000000	3451317	3576414	534991	4966	36254	12022	5459	2324	5269	140570	31588	108510	3212	15731	8056	9418	8281	10000000
2	2097	1742	2562	4694	5995	16780	8409	82124	13326	694416	62675	10000000	10000000	9125943	610202	233888	40152	15422	38064	33461	4150	2480	692081	5399	14299	5560	6003	4514	3906	8342	10000000
3	2307	3354	4691	4530	2972	2296	19340	305175	155924	237757	1536801	10000000	10000000	10000000	668392	167979	46482	68672	7596	37747	15150	6436	1068588	21609	10366	4416	13593	4177	3157	18520	10000000
4	2031	1747	2760	7187	17449	14604	19126	7352	165393	578001	1410878	10000000	10000000	10000000	1097622	144388	29322	69900	60089	2679	2929	4078	190587	254101	28651	10149	4944	3495	5606	6970	12364
5	3427	1942	4430	4802	14324	1376	39727	60789	93517	73984	62520	10000000	10000000	10000000	94916	169057	39370	77727	24418	7056	4632	2823	235779	219537	46485	7422	10535	8518	3387	17349	28583
6	1509	3496	3455	2127	15977	6203	27844	133365	306565	1089685	389415	10000000	10000000	1115583	58276	14225	45481	113053	7613	14638	4685	3646	11463	112504	21757	15322	4410	7364	6627	9424	10000000
7	1899	2730	3756	3713	9167	28961	28071	133690	264418	408215	958038	10000000	10000000	10000000	1155464	671212	106633	16468	29420	18884	9847	4512	398075	3601	19659	7470	21746	6445	10417	2121	10000000
8	1379	1377	2700	6667	13327	15528	115530	187660	396068	205290	2499381	10000000	10000000	4919819	353725	128027	6983	8472	24913	12547	7444	11469	157077	344835	148426	18655	14177	4406	4811	12714	10000000
9	1631	1875	1621	6862	18389	1814	22398	3124	221183	1220315	513525	10000000	10000000	10000000	385151	322169	18469	24213	14092	2200	4227	6496	261687	16070	6969	66662	27356	5106	5822	6342	10000000
10	1961	2111	2657	7174	4600	57760	23503	8246	819820	670938	111597	10000000	10000000	2219188	187867	185842	13506	4525	55863	15760	3594	3192	17710	16238	110836	11086	10000000	2532	3664	26668	17427
11	1194	2350	1422	3565	2096	45358	14598	183881	699702	302568	857167	10000000	10000000	866812	2410640	47203	91086	19142	13970	12832	3394	6187	395706	471668	64116	8992	13982	10020	3604	10526	9329
12	1470	2321	1615	18529	10650	30163	24417	124335	397272	313377	3304302	10000000	10000000	10000000	1238534	310837	128797	51592	27831	13625	22118	4992	32634	83384	6626	4360	5390	1592	3990	10963	34905
13	2512	1677	3210	10990	28022	29471	37512	158743	203744	2956467	556659	10000000	10000000	1756102	607761	210233	29741	56945	9966	2490	11574	2981	188933	196221	7007	35210	6845	4600	3933	20818	1403523
14	1337	3308	1901	7576	5605	11126	48265	300342	118535	329478	165971	10000000	10000000	3437908	961508	325703	18218	66217	8955	6015	7139	7249	1886354	29071	6581	1968	10971	4313	9235	8218	110946
15	2124	1487	4703	5275	6302	12216	87498	20989	571545	398898	400450	10000000	10000000	6333505	1408647	135028	11403	51094	1486	5017	2042	6565	119677	323410	10830	12980	10000000	2279	5048	5970	24885
16	3630	1903	4335	12702	5517	5697	48962	5082	152385	550530	484386	10000000	10000000	295507	2282633	306927	34983	120257	80647	9304	15815	4769	128967	134648	79721	10272	7059	8026	7483	10267	10000000
17	3532	6498	3249	2769	15122	6509	109043	65190	525008	108281	1031405	10000000	10000000	5132859	4447742	516316	116415	4028	22938	5141	6677	4669	46022	25831	24912	13700	15056	2729	12599	2754	10000000
18	1790	2527	5837	3127	12602	30650	28548	28098	610467	2245031	4044843	10000000	10000000	5341822	1150524	378103	185358	7267	22940	28748	7848	3061	137607	17056	5824	49035	9559	4102	2358	12046	376641
19	2380	1391	7664	6848	21348	13125	122243	285671	336020	109842	682208	10000000	10000000	6899047	79102	3022	29617	19026	33019	11224	15366	3777	117737	29637	93141	9966	7889	5848	6870	28989	10000000
20	3101	3663	7692	14567	12229	28541	22889	3549	122465	315580	1163622	10000000	10000000	6013813	6092156	54827	10276	67655	9003	17451	20826	27389	4786	157315	6685	23998	5031	10034	14043	12509	10000000
21	1449	2241	1875	3227	14761	15226	11392	8748	142427	838464	936816	10000000	10000000	10000000	1421236	132128	2436	40765	35827	7338	1506	2426	166864	251516	28371	46657	10000000	12219	4489	5746	5490
22	1370	3589	1753	7390	13397	10033	25684	439897	45286	1071087	33848	10000000	10000000	8098930	222350	145982	52028	17997	2670	19951	11356	8059	56330	207764	16485	12926	5922	3178	4662	2827	21687
23	2488	1959	3274	7325	7169	21307	10308	99532	182046	324274	8078599	10000000	10000000	3451317	1516184	5538	53592	37307	7111	12885	6925	12185	1421139	381361	42415	49349	3662	8203	4538	16868	10000000
24	1383	1377	13577	20422	11318	25671	58366	8234	147512	424752	2291076	10000000	10000000	9125943	1259005	102456	44502	26605	13028	13855	4517	8848	139646	147653	9560	17300	8406	6408	1839	15723	4808368
25	2457	6472	2244	4908	5908	4973	150767	1647	15326	39533	6285577	10000000	10000000	10000000	2885009	902831	123017	85217	4574	6663	8441	7962	341189	458917	4370	5422	10000000	3275	7161	10000000	17992
26	2353	2437	7201	7601	17082	6225	51972	211268	337958	603433	890019	10000000	10000000	10000000	2353242	245075	274981	65059	52197	24559	12565	11816	357606	15794	87759	27630	7521	2302	3217	4527	10000000
27	2758	1621	10300	1502	24616	14793	8946	32838	33057	319760	826768	10000000	10000000	10000000	279392	310910	27719	5191	77755	10318	4188	9289	107390	227461	22773	5620	1982	3523	8152	29245	369670
28	1271	2218	11386	15002	2463	4656	65483	58242	471948	637926	1133952	10000000	10000000	1115583	113952	115351	99326	248789	23542	20990	4383	4738	132382	94828	19895	8091	9182	2669	4501	6945	10000000
29	2109	2360	6342	2552	4355	14861	112013	34149	172217	260250	797566	10000000	4432468	10000000	760647	34048	17957	83801	4685	30900	11415	3292	2197	96368	43689	2988	2119	8226	2663	3792	10000000
30	2382	1431	5017	6935	18911	20928	45639	45690	201081	256521	307423	10000000	10000000	4919819	1078123	93464	333726	61469	55854	23578	4073	1528	422734	17745	30204	1581	1937	5271	3163	11613	18515
31	1905	2890	2266	7317	9111	4112	77615	21322	110488	776599	42794	10000000	10000000	10000000	1460579	104757	40082	14920	5613	3015	15316	5367	1039262	4768	5718	18767	2642	10504	2638	6294	10953
32	4061	2085	2066	3922	13208	27125	43364	305385	680952	465886	993349	10000000	10000000	2219188	381957	183761	40637	49546	32300	2620	5686	2753	23401	162084	106346	10139	12163	2268	3295	17328	12665
33	1702	3384	4476	3362	4638	2923	92136	233983	354047	751596	498660	10000000	10000000	866812	1916511	87199	58590	84854	13109	16518	16234	5300	341242	73632	28054	28037	8085	7497	4786	1896	19907
34	3337	4845	5113	10494	17091	6851	10730	122505	300525	108980	3913033	10000000	10000000	10000000	103588	51842	25594	23841	22642	5313	6644	4280	266572	36312	101038	12388	19554	4309	2268	19549	10000000
35	1878	1321	7356	6071	4704	2185	22745	108931	218800	515609	940767	10000000	10000000	1756102	2317780	117672	46519	61813	2744	5426	21579	15509	198915	221808	6145	11570	3585	3527	2321	5004	10000000
36	1354	2701	6203	5691	2570	5252	16280	39174	25001	1476921	2851625	10000000	10000000	3437908	1696655	599192	18396	9605	3995	64615	10287	2297	422155	34546	88968	3780	22108	10766	2246	11467	10000000
37	1275	3438	1535	6528	1737	36620	83064	33166	10668	391225	434435	10000000	10000000	6333505	635625	385317	38758	4071	20359	4359	10143	13748	60866	107754	15476	3884	1711	8670	4766	10722	12364
38	1646	1564	4397	6159	9929	1480	39134	57420	425105	1687241	197415	10000000	10000000	295507	934490	75890	64576	11945	30934	5729	1732	11166	30483	350880	10592	62950	4768	8383	5839	5948	28583
39	1880	1521	1523	1658	1459	2352	7265	6920	5545	153647	1302507	10000000	10000000	5132859	3382854	275744	94475	10005	23640	4254	4770	1961	109323	19886	11282	34940	27506	16738	5843	9010	10000000
40	1334	5732	3345	4036	5235	42143	14620	53842	144008	1615048	1509666	10000000	10000000	5341822	1263932	26574	30493	33317	25629	27067	7956	4883	525563	104942	7532	1900	33483	28542	6368	14994	10000000
41	7091	3006	4453	2290	6544	22310	57239	42861	292063	450749	344041	10000000	10000000	6899047	1769148	209936	20926	48906	3989	9461	13176	9466	45469	13758	48550	26667	20877	4560	5578	17770	10000000
42	3343	1970	2903	30889	2596	1915	89261	91132	100186	693815	2344639	10000000	10000000	6013813	2332390	29439	156206	40326	8069	12176	7352	6420	107417	183195	273256	70035	4313	4707	3180	24063	10000000
43	4237	4742	1659	3096	30407	50056	32247	65442	138730	2267548	1463756	10000000	10000000	10000000	751749	238508	55369	152271	13909	40797	10359	2371	689778	298540	11626	5324	22101	5192	5298	9001	17427
44	1862	2081	2909	7378	3350	5176	31337	91739	254793	869951	25828	10000000	10000000	8098930	120208	151046	6590	26845	33850	18396	21433	7334	511878	20819	39678	3301	5664	4157	13209	20715	9329
45	1841	2730	2438	17395	7504	26739	4593	157708	81719	218922	3213051	10000000	10000000	3033685	3031687	207354	62214	17598	5350	6603	6100	3058	259373	258974	68525	25252	1612	2435	4265	16318	34905
46	2166	2812	1953	1199	2184	10392	52702	134862	327755	780441	4944453	10000000	10000000	9070496	369435	361522	154336	50107	17989	29894	34683	4560	555872	802547	4243	8571	6259	2784	5506	3393	1403523
47	2657	1319	1504	1459	6552	24838	171884	7963	340173	117458	1739254	10000000	10000000	8675368	1576252	209280	33918	53429	40014	22999	20556	5808	991576	432674	29194	21210	12925	1745	2566	10999	110946
48	1404	3626	2002	1751	6428	66750	18439	17215	309234	827872	1542207	10000000	10000000	579515	2356427	136789	33408	12465	14822	2000	17361	15900	850114	16810	19435	18605	1952	4903	16504	15146	24885
49	1219	1960	1530	8003	27404	4547	71583	58398	376604	857575	5738932	10000000	10000000	8008856	83827	26912	100694	42292	6880	4241	11659	7041	29236	179662	73546	5738	17168	1960	3839	13528	10000000
50	2690	1427	5354	11413	7396	36015	52844	32537	228866	970632	903946	10000000	10000000	10000000	1271540	18018	46705	232714	10705	2236	15009	13362	45701	24063	1744	11192	24126	3389	2333	7462	10000000
51	2377	4541	10681	2892	32142	4395	29169	55893	176277	575196	5996108	10000000	10000000	5488349	1072282	48206	128675	2217	3692	2747	5901	8326	1451044	205773	52844	16628	6833	4125	2516	2743	376641
52	6088	3698	3421	4373	24396	18389	6554	35890	199657	64236	778381	10000000	10000000	10000000	974334	2331	25309	3662	3307	16604	21413	3932	1002700	95895	59819	62096	34899	4115	3693	10803	10000000
53	3488	1396	1538	2350	4825	15670	45801	87687	161085	458998	312448	10000000	10000000	5588509	1398184	59679	50447	47574	23632	50724	4819	2893	96693	418424	45785	18971	3663	5295	3242	3946	10000000
54	1304	1458	4238	2282	10498	38451	83051	112008	351645	1005866	703377	10000000	10000000	10000000	164873	381282	17158	21779	2345	7439	1822	2051	556998	11287	4879	10149	3966	6718	14201	2450	5490
55	1299	3765	7436	1946	7646	30065	27175	39963	95757	141405	1188723	10000000	10000000	1369153	718923	7948	17277	67164	6477	13838	21180	6430	570249	514369	42763	13667	6680	6867	11379	5797	21687
56	1745	1337	2480	5631	8278	17129	10897	55379	8695	1061174	310942	10000000	10000000	5224	923702	76925	143983	10222	16297	15541	8387	1590	28703	114074	26922	7387	11430	10320	5283	6196	10000000
57	3022	1710	1769	3913	4035	5187	6035	21409	18152	143433	1453956	10000000	10000000	395369	265615	74558	29996	49699	29038	3619	2189	9202	119338	150300	84560	44844	12336	5143	2737	4534	4808368
58	3607	3043	6240	3530	2502	36814	3503	23829	101334	2300207	2066012	10000000	10000000	10000000	696794	34417	14492	74030	16372	6787	5277	4786	396057	316020	87602	27137	10113	3536	7371	9138	17992
59	1336	1363	2592	6586	20070	7607	12473	316963	36039	221566	2061457	10000000	10000000	10000000	1889042	122649	38992	38895	21473	23173	6416	6416	51329	169250	25357	2352	8473	2230	2587	5081	10000000
60	2543	1851	1711	9662	2513	30213	29874	27483	17742	547596	774019	10000000	10000000	2102673	2356000	492378	27198	26521	25079	16778	3165	4014	45127	18104	114576	13363	3442	5708	2470	22466	369670
61	2130	1208	5588	15020	2615	22380	2205	68265	236766	508831	2175712	10000000	10000000	3910928	335561	761414	18847	11017	23711	3632	2500	3375	741089	12042	74621	3722	1683	3933	5035	7836	10000000
62	1370	5697	4328	2990	17476	3428	76748	40331	26405	22470	843467	10000000	10000000	10000000	108482	305686	33796	44634	19037	1586	11895	2484	915490	45291	4961	33067	2306	5169	5223	3832	10000000
63	2898	1734	7227	3876	10865	5589	59385	97445	92384	29647	265234	10000000		1080388	71523	116779	56867	13231	16115	5356	13539	2542	554037	65891	53828	7838	2347	6423	9364	4598	18515
64	1419	2372	3026	3444	8217	17023	19418	7849	37951	591627	573622	10000000		10000000	1448184	296320	40671	1935	7070	13881	9996	1787	453321	185120	71562	1782	7169	1942	3728	19089	10953
65	2266	1323	14044	8131	3675	14435	11693	63320	148850	75928	457962	10000000		2224441	612039	364280	36283	29608	75884	10774	5250	12487	580076	353127	47243	23127	9444	3264	2882	7055	12665
66	4478	1536	2549	10731	31309	6041	16063	56120	47346	1277892	1280246	10000000		4770245	1965670	125722	46341	22479	79911	76225	3000	2192	417238	62197	328434	28732	10000000	5564	5145	4722	19907
67	1760	1616	6218	1963	2740	38284	37416	15366	63275	417058	1589463	10000000		1300099	722881	62160	49613	19263	38686	12168	3732	1405	54423	65808	102819	5032	10039	2782	2942	7664	10000000
68	1964	1671	9920	2847	35094	9832	59769	129100	4844	432617	754587	10000000		5559471	511985	298781	30620	14510	2220	10172	2493	15935	120784	920170	4827	26854	10000000	6209	2527	8471	40025
69	3973	3385	1844	3257	10281	102038	25602	14026	37725	28453	1050545	10000000		225602	656341	21207	41687	15850	77384	2293	9942	4649	89916	536652	90545	20148	13186	10675	5575	6240	10000000
70	3244	8118	1277	11599	1780	12581	12546	49790	41999	123305	1417459	10000000		8813267	820119	319071	63865	4230	15509	2476	26401	11520	533191	304769	75653	25194	10342	2068	12428	8282	10000000
71	1445	2902	8792	3592	39253	64005	44835	180479	288862	759280	317982	10000000		8945885	492237	105376	17512	15615	72140	14234	1626	2417	451200	84797	4838	16670	11875	5057	6089	5726	10000000
72	2234	1468	11925	7084	3880	17567	48124	49423	112587	261033	368154	10000000		10000000	207181	25181	14888	97435	2342	3415	6581	8842	118207	438642	37709	13716	3706	2098	9031	10063	10000000
73	1314	1653	5032	1725	2175	26027	47530	21339	403827	68710	603635	10000000		10000000	2060880	47659	138160	5670	15654	24621	14292	2224	567326	309895	42578	24409	6659	2909	7514	4878	10000000
74	1349	1371	4079	2684	3763	74662	30793	139515	301258	156118	1903540			3699238	616623	257953	179181	20115	1926	29142	2099	1468	894003	87858	36581	29308	5554	2357	3684	9780	12214
75	1737	1399	1913	6758	2175	1921	80541	123568	336423	784558	3570063			7135106	131892	20939	83668	62712	26039	1553	19413	6232	648947	197625	10053	27195	5325	7736	5701	6198	105726
76	1307	4152	9065	9982	19477	2741	9918	53427	125484	2371	5466891			3798485	2535784	29050	1555	19565	22732	21299	7242	4338	194043	229316	12159	45411	2027	6827	9112	21973	10000000
77	1336	4040	5482	19648	2337	5068	81557	36639	57739	2340569	1410439			150306	118446	196415	28451	44556	2502	24596	8026	1653	141876	20166	12135	15076	5729	8820	14077	23191	10000000
78	1163	3244	2215	2624	3385	32323	29579	104062	228707	158679	1185467			4880887	953408	89682	79189	22615	72808	11987	2441	7735	179790	98952	10942	2492	3467	2956	6472	7545	14222
79	1479	1614	1984	7717	1831	5679	9467	51861	301069	1333587	980965			10000000	3316232	238265	1406	252916	19998	9900	2575	1796	360353	18704	10262	40066	14684	6476	2967	7283	10000000
80	1987	4854	2382	4301	12744	5356	13342	19922	715808	137912	295937			557511	598233	18909	48464	12175	3448	9349	1847	1852	277312	65335	2033	9461	3056	4848	11619	6241	10836
81	1474	2789	1851	3741	5734	18933	112192	13591	292036	1428803	1188611			10000000	15682	114318	57742	149837	60903	8840	1704	9708	13112	78732	35941	10132	5042	2482	2144	3011	10000000
82	2705	1857	8020	3832	5264	31006	13036	68372	103072	129100	425763			10000000	955859	369296	30036	7685	9555	3202	10586	3738	68446	32185	1661	2509	8629	4539	3036	6611	32335
83	1421	1544	3861	2509	2721	5605	10182	22564	258546	317232	2654769			10000000	33957	71104	70670	42082	32366	22503	8543	4193	586780	98251	3979	18772	24061	3436	4385	10773	1783826
84	3015	3775	1684	4437	4559	1684	3305	119243	698758	51244	1632862			1679890	563969	418450	61137	45494	19238	15844	18428	2180	472589	30729	10394	68587	18497	14972	2739	7257	2526220
85	2127	4340	2581	11943	7214	18919	59881	264312	60195	93395	772633			4475381	183168	72957	61366	35353	16252	30247	10323	3926	816735	65006	105459	29381	10000000	5380	6472	3471	10000000
86	1476	1690	5539	5389	12892	13067	27005	29315	94221	173102	69946			9450094	131163	11120	94906	85119	56820	40079	20384	3438	600895	27344	61953	8458	9245	7483	7468	7084	10000000
87	1531	2108	2832	10757	9115	8587	61658	83936	154602	803141	240383			10000000	1072314	120308	80986	113142	76767	7128	2244	1932	288213	102383	51822	8384	2719	2720	3301	4113	23700
88	1316	2289	1660	3765	4452	82396	89899	180712	1018231	61490	1175754			9401073	235094	45155	23142	30958	4554	6031	15418	2381	4494	44701	58033	60083	19065	3203	3024	7317	67224
89	2472	2388	3576	1187	15744	25751	28372	9939	18905	156734	5410136			3090557	102175	197436	80484	14857	8500	6890	9453	2214	467060	103049	47413	21797	8238	2771	9426	9088	8288
90	4623	3044	4847	6386	39651	6209	30561	122712	87038	588750	236645			10000000	241316	590014	13653	23016	48491	32515	23588	2309	115324	92098	34127	15996	17668	10121	5619	5434	18340
91	1929	3297	1883	4592	7646	11879	33923	35693	111024	348581	1887805			3866971	1332463	102022	14714	49117	10544	5677	23018	2693	737380	356587	42186	42784	2976	3613	3944	12242	10000000
92	1582	2605	3202	6484	16323	75188	16678	7246	155377	1136182	1345056			5338553	393444	120706	11444	112091	2156	3944	2432	6114	236478	7700	67251	10073	42337	3652	3189	12276	24361
93	1315	6513	2815	13993	10400	6868	14846	41866	80052	259003	283865			604646	2584321	8481	11371	3718	59594	18212	9616	2678	512916	27109	3275	39285	2059	5423	6520	5978	10000000
94	1522	5037	3270	4261	10120	10592	108135	60385	39923	279341	1171227			1717373	425958	61246	137181	20113	64610	1876	5441	4566	127428	54993	43094	12196	8134	1761	7897	12283	13252
95	1532	2116	1323	7059	20192	5099	21149	103016	158955	1550434	711797			10000000	48515	25945	33180	26766	6885	7497	10534	10055	554474	135472	95429	37981	9328	4356	4924	4712	77081
96	1806	1742	10362	5600	22150	9528	16752	33686	125897	612330	488407			10000000	104915	297869	124343	37738	27793	20675	3241	13238	660765	125376	7025	32501	3147	2934	5474	21336	5661
97	1262	3606	10699	3659	1417	23826	4422	57185	34789	745903	991971			3025389	22222	97751	33911	57881	4581	85276	8334	6289	105332	18717	40770	16627	10000000	14738	1832	2661	18390
98	3694	1982	2945	3337	3142	12457	33209	130303	166313	1275383	467387			1757513	759902	7480	269817	25053	25598	28490	2788	4737	106838	119298	12706	68547	4261	2702	2281	6879	22778
99	2453	1753	1960	3975	3559	6476	23655	16051	602892	372540	556890			5470543	1257203	131956	44565	18160	18175	23212	2212	1722	218905	179610	38660	4904	6419	2581	2427	4359	10000000
100	2152	6406	7755	1455	6778	3554	27028	2525	23323	282971	1462163			82371	172284	146523	22311	64488	21141	34787	8506	2320	59618	10615	44224	33326	4106	2425	2596	7311	1465693
101	1181	1731	6433	11797	3843	6570	67047	228544	6791	22647	2252134			10000000	616499	720007	56200	33664	36690	5459	3259	5044	244766	48673	37457	38344	3716	3608	4404	5818	10000000
102	1123	1117	4673	19053	2501	8044	29911	82124	13326	1155099	1013531			10000000	3176740	260004	54713	72047	30951	33461	16812	9902	185641	74457	34537	74274	4811	9620	2840	13283	23049
103	3301	1518	4025	2847	13823	8583	12246	305175	155924	1242089	442925			10000000	360374	24476	48925	71205	3844	37747	5464	1824	196274	604880	20357	17720	2818	7902	2503	19347	40025
104	2261	5142	1503	19805	5837	32622	3797	7352	165393	100911	535638			10000000	2983757	200628	81672	41040	9976	2679	15189	8038	26531	568720	1627	43194	17912	7209	2962	4981	10000000
105	4784	1309	1450	1475	37933	13242	109058	60789	93517	297068	204080			6809344	43009	1002065	59169	3539	27782	7056	5592	5790	628811	46949	20962	1840	6759	1811	10218	8618	10000000
106	1921	7406	15437	14100	16497	17901	12840	133365	306565	994695	1895718			5926358	141155	400310	139900	66567	6783	14638	9881	3909	119032	193112	4323	18740	1522	3575	3372	7847	10000000
107	3362	1425	4120	7980	12316	3628	131667	133690	264418	224452	1435536			10000000	240831	28585	119509	76887	10055	18884	6131	3001	666961	18668	24210	23429	7817	13533	3100	15686	10000000
108	1586	2958	2952	4885	4691	26191	6287	187660	396068	622134	278916			4890659	677891	74654	267670	3555	14451	12547	22148	2243	342022	5150	97442	79102	16713	1893	12705	15938	10000000
109	1638	1589	7560	28723	14087	5729	88252	3124	221183	425800	22638			10000000	1717587	316329	2171	193764	14737	2200	13595	11196	93219	228926	176035	2959	20572	5712	4569	4618	12214
110	1668	4325	3731	3940	7337	4322	2965	8246	819820	285850	501421			5695776	24995	110160	112743	86276	1862	15760	18378	4905	410244	19451	4618	10965	5934	2557	3734	11493	105726
111	2750	1339	1485	4905	3704	1713	70442	183881	699702	243843	1241199			10000000	181934	295445	168108	5758	65764	12832	2499	2612	61140	45824	6055	27056	9353	2004	3048	13645	10000000
112	3868	1714	2150	2536	9782	9048	23248	124335	397272	648514	7657062			7883538	2652164	7320	167256	13942	47971	13625	4266	8178	535750	336943	102702	3367	3677	8206	4159	3502	10000000
113	2103	3414	3306	17159	5638	26785	19613	158743	203744	749186	430390			4990156	3678444	123510	66045	78681	2619	2490	12059	7961	3171	229386	123853	6740	11401	5380	11105	3624	14222
114	1352	2580	4988	13615	8727	11267	2386	300342	118535	1206517	1000989				2689983	159742	58636	70383	16071	6015	1646	5890	433733	80644	40321	4086	5499	8174	6713	3288	10000000
115	2272	2263	8297	5022	23222	13034	18939	20989	571545	318836	2974104				597212	235054	118855	64330	20248	5017	3714	2045	171635	71818	67344	20140	10000000	6050	2678	7320	10836
116	3859	3804	2954	6927	8541	13781	32734	5082	152385	412347	651766				1416257	677331	35103	3593	54682	9304	8650	7022	196988	61757	65757	37210	7173	12911	2694	10188	10000000
117	2277	1551	3767	2889	8309	7246	65861	65190	525008	584819	1740061				200094	7822	64308	24311	21550	5141	1846	4920	855333	266839	21454	5363	9070	3273	2351	15343	32335
118	3646	1565	3118	2537	2883	28071	5713	28098	610467	255330	724978				35908	148657	61146	26872	21880	28748	14825	4824	688884	16176	60282	12232	5485	5409	4238	11447	1783826
119	3577	3188	2524	4828	8276	13773	22528	285671	336020	314051	2521038				548469	29405	11575	1915	66326	11224	24143	3806	44149	111255	9762	13661	9324	2098	9074	32276	2526220
120	6305	6899	4486	6006	3561	3941	23063	3549	122465	187099	4246299				295678	31067	2945	53026	10566	17451	19446	2221	26943	126527	99631	27321	19004	3201	6381	5698	10000000
121	1371	2766	4460	7830	13834	34944	21233	8748	142427	407862	1240868				1666566	158871	22503	30441	30871	7338	9560	1444	167432	24866	46664	16201	2070	3623	3636	6205	10000000
122	5746	1510	4365	3741	11084	2693	29566	439897	45286	198576	578353				435544	194525	110160	149476	28826	19951	2275	9300	109024	114284	23111	16335	10000000	2664	3034	3004	23700
123	1686	1757	17957	5208	4289	16627	20183	99532	182046	1046760	3061665				1013892	16490	12871	30677	39075	12885	18000	5928	1471042	216261	160594	7439	2258	3441	2048	4259	67224
124	1298	3517	11586	19070	7999	17266	57505	8234	147512	993732	167958				663131	134012	90638	8674	5888	13855	3810	2433	787405	6991	147308	5508	24279	1958	10388	72928	8288
125	3413	2674	3185	1626	10646	45391	37063	1647	15326	79879	1218638				740827	291493	40518	37180	25905	6663	6202	15776	704410	126867	7106	1952	3668	5863	5532	10765	18340
126	3445	1345	8605	7840	13497	13106	52989	211268	337958	68348	304706				245700	16043	111453	12460	9661	24559	23424	2931	379679	297408	2674	29540	3888	7103	4373	7336	10000000
127	2148	1708	2691	5041	25829	5895	68427	32838	33057	358752	1111750				2363662	106879	13548	69806	23469	10318	10432	1457	483752	117863	6069	55554	10000000	6450	7169	16072	24361
128	1387	2393	7089	4704	16309	8550	7378	58242	471948	562728	265088				1479869	77387	79090	55119	21364	20990	11210	4620	806438	140837	19244	4704	8035	4855	2825	6112	10000000
129	1582	5841	6371	6444	1352	3323	2142	34149	172217	457495	1987693				346377	218649	73315	96466	38324	30900	15687	10696	726256	4203	9038	10640	5292	22794	2334	11545	13252
130	1580	1573	6392	10177	1650	11770	36697	45690	201081	19007	2242732				1804188	310205	51880	8286	14014	23578	9831	4625	101868	163386	22568	7019	2711	9445	3566	3451	77081
131	1649	2947	1320	12274	9913	35263	3043	21322	110488	254186	2636759				754381	69956	214624	1439	14485	3015	10424	4725	133069	23293	2270	30147	18776	2021	10870	4731	5661
132	1218	2673	1285	1864	6832	5584	19036	305385	680952	59394	7098174				652432	624736	33024	12860	45872	2620	3695	1939	721085	57956	89598	74205	1872	4962	5890	8446	18390
133	1612	1602	4988	6573	19916	4039	80918	233983	354047	194730	736898				645125	465571	44658	42076	4300	16518	3244	1485	42525	330956	63319	16071	5301	2496	2590	7694	22778
134	1975	1600	1748	2765	19305	5502	4409	122505	300525	398715	962839				1038740	585222	30457	93078	11893	5313	3879	3988	346143	362448	23177	10765	8833	6479	3455	37884	10000000
135	2269	1450	4275	2400	1944	36495	45763	108931	218800	343591	171879				1581382	396150	57614	61041	14491	5426	7728	2713	449861	60740	6274	7512	10314	8549	3175	14881	1465693
136	3111	9942	4949	2581	10737	41187	19339	39174	25001	383699	535781				111185	133826	116101	81929	19276	64615	22979	5265	230981	281467	26607	4489	17419	3517	11509	5127	9439
137	1643	1616	1739	1587	16890	1802	11464	33166	10668	446410	715305				2185042	156660	159532	18873	6423	4359	13799	4493	635930	36618	21161	5643	26368	2193	2434	18867	10000000
138	2036	1529	3278	2897	3049	37736	25005	57420	425105	42351	436203				557370	177919	62385	46780	21977	5729	5344	2873	1055633	188319	4803	1378	4039	2362	4323	3359	10000000
139	1424	3435	5273	23679	20826	23621	35287	6920	5545	834662	881348				1409327	205646	143156	27233	30124	4254	9849	6873	46162	280331	100163	4416	4229	9552	3456	13273	10000000
140	2260	4313	2010	2240	4245	19501	4415	53842	144008	650118	4191656				21176	88244	124623	56213	5144	27067	1707	6255	1490228	140588	35586	4350	3933	3176	8228	18196	30352
141	1298	1374	3111	4982	13285	16194	19734	42861	292063	218281	638560				615302	247296	23696	51682	28070	9461	23286	2567	21907	120154	230285	19694	4987	5879	3859	2050	10000000
142	1367	4142	2097	1832	12901	30584	33331	91132	100186	1055314	37074				1061057	235749	88447	3529	39321	12176	13167	8607	398409	11316	99979	15152	7711	7186	4259	22538	10000000
143	2267	1371	3084	9941	10563	18003	55049	65442	138730	1405468	3186606				385685	465141	35571	53224	12310	40797	21986	4204	607123	30747	142165	2733	4090	3719	2505	5423	10000000
144	1620	3624	15906	6973	23155	15424	4608	91739	254793	282402	4716007				1830437	121490	179270	34886	30745	18396	10371	1722	1480267	258493	5062	8157	14485	3522	4089	9035	15538
145	1373	1518	1341	7977	3467	18725	73814	157708	81719	22869	2148897				113863	222349	25492	34256	14346	6603	6978	7288	131712	360300	46362	3050	19289	12527	3392	7159	26354
146	1294	3702	2123	6350	16587	1952	34352	134862	327755	185549	3117939				1379928	423898	9592	11053	25766	29894	13782	7860	1581820	91719	29757	10129	10335	4415	4346	3387	18136
147	2067	1269	2854	4123	14683	12160	80617	7963	340173	2069827	2302223				1402457	164350	96462	30310	14015	22999	3853	12666	248982	76865	32003	10465	3231	3461	2791	20927	26571
148	1174	1463	3252	3952	2310	4068	14591	17215	309234	2108335	595590				593849	38209	57058	132284	7925	2000	5834	14825	293004	470527	12808	36821	10808	2617	3180	6248	10000000
149	2262	2401	5084	3029	4911	1469	48734	58398	376604	555665	1192283				993120	185539	137566	93947	5421	4241	4785	8700	989667	21465	10982	13051	4267	1582	5328	5173	31857
150	2317	2877	2528	8778	1405	14860	15362	32537	228866	804340	801257				785791	147879	74082	9686	1923	2236	3862	2177	60412	27847	24262	15011	6917	4665	8224	5132	16757
151	1542	1478	15827	8215	10828	21882	16314	55893	176277	24960	1468664				1011518	473936	4228	103192	11787	2747	2939	7168	660353	456485	6325	12067	23157	11040	4629	20541	6121
152	3394	2056	4849	3581	6751	13376	36703	35890	199657	287834	5139311				523368	584826	58196	23577	67569	16604	11886	4061	258221	165090	31376	17666	15088	7176	17057	5921	63079
153	1677	1963	2672	3565	4857	29410	23455	87687	161085	862466	679479				912598	62309	94144	7178	38633	50724	5397	6593	500763	77763	33215	9830	16444	10024	5729	25272	10000000
154	1796	2337	1607	10628	16842	13691	8821	112008	351645	189249	601360				266946	205335	66044	22713	7654	7439	20058	4682	225658	71249	35007	5907	10000000	9949	4614	5079	326894
155	2450	4084	22435	4734	11162	27101	23428	39963	95757	694568	1679103				778082	205310	6774	19737	5736	13838	7103	12484	330618	24327	23807	25776	5884	2446	8307	7134	10000000
156	2167	2629	4591	4117	15791	54368	9039	55379	8695	1487934	2509586				248192	236711	129042	54781	12587	15541	2431	2937	162463	109637	27712	22553	16605	9978	2129	32702
157	4974	4735	2749	11606	15430	51104	21131	21409	18152	1129476	649216				1752433	92661	11625	22452	2427	3619	1516	3995	28268	30581	49841	18206	12003	2082	4763	3134
158	3292	3725	3553	18238	10484	60518	82718	23829	101334	183215	620794				578701	670171	218651	9440	26495	6787	2419	4302	112136	324984	47686	36505	15761	13539	3326	6463
159	2247	3746	3030	2861	15955	12333	1558	316963	36039	1652370	844911				164744	3273	44515	83935	12533	23173	1950	7017	31654	110527	29291	16009	2199	7234	2295	11947
160	1380	2357	11604	1648	6275	4683	17017	27483	17742	1898619	853199				795662	200734	96462	31936	19525	16778	19054	10596	629708	111363	6637	39627	10000000	4158	2869	8778
161	2624	2632	5252	3640	14841	36609	20540	68265	236766	1217435	3454745				1575441	171951	180097	6145	15022	3632	1507	5394	929014	148623	109899	74831	3935	5405	2062	2422
162	3038	2219	2579	5349	26614	13786	23513	40331	26405	178120	855908				669282	623849	211521	22745	101451	1586	8514	5336	455268	442414	14467	25542	6954	6763	2761	6997
163	1723	2844	2342	25180	14278	18130	5011	97445	92384	825175	1831033				57324	79652	17945	37163	22851	5356	3388	8657	705387	162508	16377	23779	2148	4507	2466	8304
164	1426	2663	1554	1857	4569	14012	78476	7849	37951	1263452	811611				836852	14333	51004	18603	29491	13881	3152	11615	144460	25901	41694	27638	1601	3992	1817	22485
165	1358	1491	4781	6084	17969	6705	88571	63320	148850	239508	515213				1156999	176011	22920	30823	6888	10774	4285	11111	404013	143283	22350	55661	6102	2637	4420	4566
166	3876	1363	8477	9355	17953	15703	20365	56120	47346	716778	171036				1380630	43986	280216	20178	13667	76225	4366	4387	608094	23368	94023	41599	1841	3280	2521	2732
167	1603	3094	8354	21051	11638	21775	53266	15366	63275	1096305	3655295				1018811	52518	5500	43621	7605	12168	1965	4729	84943	132369	137598	56234	4497	15821	5208	37713
168	1664	1607	1406	1275	8812	13328	9501	129100	4844	1205518	184975				1074499	185257	27124	8848	23519	10172	4754	3517	393674	275527	35855	34029	3479	4012	9217	2886
169	1713	2354	2668	9997	4164	3166	21842	14026	37725	739091	3105118				1352075	46323	52436	11403	8835	2293	3233	3073	112418	48673	17323	6013	7162	4253	7446	12248
170	1723	5385	3923	7685	6328	5182	51985	49790	41999	355114	164010				829285	78125	77527	30130	22756	2476	4285	3547	317111	470305	36788	33090	14811	5140	6967	10634
171	1570	1521	12844	4039	17261	111690	54425	180479	288862	992849	601778				2679869	289622	10230	72134	5236	14234	2803	4316	276202	215712	77669	43455	1967	2240	2408	3189
172	1733	2563	3492	10064	4313	79959	35990	49423	112587	469186	63895				194239	218398	361026	14320	17819	3415	1256	3182	391856	26781	1878	21004	1874	3631	3431	17217
173	2488	3596	2839	2136	41386	8771	31241	21339	403827	24718	1390775				682968	5361	184145	43133	4059	24621	9924	4798	350972	102947	30570	8983	1872	3082	5632	17762
174	2644	1628	5329	24024	12441	5792	65135	139515	301258	386493	1760499				113745	58025	18658	58490	1925	29142	1278	9922	12877	14173	22742	56078	10000000	3174	2330	4057
175	2569	2526	4197	13885	7207	8613	2413	123568	336423	586895	1486421				1264513	101490	188662	24640	25351	1553	3157	4555	816879	5023	16558	1932	3117	3828	7959	12322
176	2494	1269	6349	6342	4546	14431	4535	53427	125484	400553	5792496				198962	433774	37498	5228	28419	21299	8613	13518	306389	60710	78403	26159	4500	4514	4758	20601
177	1710	4945	4354	2911	5597	7853	34092	36639	57739	81841	1248266				1795111	763650	79688	16381	22544	24596	20178	4727	131087	201512	46484	8945	6525	2840	3720	2652
178	5279	4252	2681	3183	5141	14746	6282	104062	228707	255755	4218538				522376	150419	114272	97667	2411	11987	1506	1985	291252	147269	18670	21766	14038	3526	7111	9029
179	2797	2041	2592	15382	8532	5031	70314	51861	301069	15115	3075295				4526018	566099	45774	10293	11958	9900	7872	4981	762260	198120	107377	8029	3274	2540	6028	11961
180	2821	2153	5182	7337	3573	6161	4060	19922	715808	99503	630121				219669	351229	9776	7232	106618	9349	9596	1548	99893	310530	9183	7837	11933	4197	6145	4582
181	2124	2870	4283	1349	5877	58741	22730	13591	292036	489437	1604185				59490	360699	12091	33751	2862	8840	8904	6725	318605	421188	29083	9604	2736	5765	3113	4838
182	1488	4472	1386	3364	2752	20228	62790	68372	103072	339101	245417				289720	117239	1900	60893	33633	3202	3450	8906	950274	68968	4936	6236	2661	2419	5208	4146
183	1296	1594	8378	2534	4400	3728	12569	22564	258546	83894	353035				304996	236150	92627	13944	6077	22503	3006	1922	188202	518309	32547	6530	2107	2503	2402	18319
184	2257	2062	2019	5324	9554	9177	49214	119243	698758	1689450	914436				32326	95326	118114	3897	22375	15844	7917	5316	158262	48783	127537	21459	3453	3241	3558	3773
185	1297	1774	1921	5749	27144	1899	3638	264312	60195	398423	1276079				144466	41210	3914	63123	22124	30247	38011	4611	483858	337114	4201	4927	2361	2491	8313	24787
186	3028	2332	1361	6569	3652	9491	50473	29315	94221	193883	571027				132803	395139	18040	67374	3591	40079	2854	9141	228906	19867	93133	52835	5674	7778	6148	9156
187	1485	2221	3287	9956	12588	46284	60103	83936	154602	68504	1554346				80195	207379	57307	106342	63550	7128	5002	15107	121476	293919	53581	7630	10000000	13833	9678	24602
188	2721	2457	1639	8327	13322	3053	29307	180712	1018231	1115467	801945				1046844	203572	32897	173654	2058	6031	10199	6177	46468	19070	30530	30739	8580	6986	2856	5379
189	2581	3835	2894	11153	18666	6694	33565	9939	18905	616808	578771				1870715	24147	13224	64301	3906	6890	3716	5645	282109	119817	1987	43390	13696	3156	3710	9848
190	1311	4125	2195	2971	17019	12425	53248	122712	87038	682611	2036018				2731319	155897	8828	19084	6390	32515	1873	4514	3022	163883	83985	6334	5771	4862	3949	8318
191	1269	1479	2147	4918	2669	8044	19123	35693	111024	126325	279822				797090	1015456	110573	32376	7195	5677	9836	3604	187018	149576	18076	76674	8640	4699	2030	15994
192	1782	2058	4758	18957	2144	6645	32397	7246	155377	676678	628353				391426	146075	194125	53090	1773	3944	4361	3161	148258	133321	5598	9402	7024	6111	6190	14802
193	3727	1683	1309	1889	28795	19344	4673	41866	80052	449885	523953				329356	301896	11665	39213	6290	18212	17869	9979	92541	150604	20205	12226	3785	9541	3359	7195
194	2177	1708	8111	4909	27017	7921	90792	60385	39923	80277	2361665				136143	210981	4656	52966	13764	1876	20116	3534	288855	186047	51357	13544	12859	8447	3155	13919
195	1421	2106	2616	5551	9151	3014	127437	103016	158955	1187335	1391190				1381430	57471	10484	4087	17720	7497	6784	4302	66836	133264	15347	4418	22927	28976	2968	4944
196	2906	1953	10507	8701	5043	15708	122835	33686	125897	1927813	4957851				287122	254894	50618	119575	69184	20675	9917	13425	108270	124242	24227	10368	2055	6207	2281	8331
197	1623	6764	2300	9914	2683	27468	55371	57185	34789	837946	107369				1011399	20084	17160	26595	9139	85276	3277	4490	497927	30084	14960	14955	4298	5724	5312	45824
198	2701	4071	7231	2222	11620	2587	19944	130303	166313	516953	1087934				265297	222470	58099	23951	2836	28490	8382	3254	175073	533776	35001	15010	10000000	2903	3313	5677
199	1774	3314	2360	2224	18177	30361	37791	16051	602892	97675	172296				1226490	376156	24699	9396	15581	23212	17776	21642	14162	285555	24879	12957	10845	7762	4909	3987
200	2262	5265	5364	3491	26441	16315	20689	2525	23323	1531983	2803670				198927	744506	28143	96427	9780	34787	2089	5252	78846	361934	29256	8277	4174	5787	2991	6482
201	1428	1736	1931	3729	3843	6570	67047	136391	6791	562277	257323				251141	188585	61290	85083	36690	5475	8146	2057	170581	16406	50337	23730	10480	4277	3190	4587
202	1802	2878	6541	3147	2501	8044	29911	105915	13326	562792	1555618				1131014	141320	214954	10921	30951	7620	23382	2021	139922	58409	14212	48755	6901	13111	5316	10000000
203	5448	5134	22415	26301	13823	8583	12246	64282	155924	1311098	420618				30079	302090	248968	118687	3844	5383	11392	10169	162878	76048	4246	32296	6539	3678	4031	17242
204	5226	3862	5142	2067	5837	32622	3797	392682	165393	782971	1135939				39379	605348	144066	31417	9976	2345	24186	3311	128485	153098	37844	7086	10097	3345	1680	4516
205	3627	1367	2270	5088	37933	13242	109058	74052	93517	3599	3190241				681449	34700	15654	196010	27782	3127	7554	7915	57344	160063	36386	8615	5592	2382	8393	6125
206	1358	1440	3457	19779	16497	17901	12840	62826	306565	714018	132336				207960	101356	185456	89975	6783	31159	30661	5657	792132	317714	91336	4093	13290	2776	4110	13504
207	1128	2514	3814	4270	12316	3628	131667	4184	264418	2407694	3345131				546620	66144	66280	3433	10055	8276	2936	2460	335968	58452	6408	16955	15495	3870	4916	13223
208	1240	1986	2405	23626	4691	26191	6287	123024	396068	11924	592653				103466	96931	105535	4495	14451	8805	2849	9788	786038	381451	41758	1819	11294	2728	12034	14829
209	2140	10978	1681	10059	14087	5729	88252	18875	221183	570644	180643				1091161	66397	9377	2204	14737	3683	15341	10791	872033	18549	45707	6662	4982	5826	2533	4698
210	1626	2238	2023	16586	7337	4322	2965	3797	819820	266829	84021				796317	100866	30659	40529	1862	11229	13717	3680	149564	60877	47556	43963	16315	4436	1863	6974
211	2034	5960	2476	4606	3704	1713	70442	134562	699702	32105	2691266				842774	133247	44563	43155	65764	30614	19033	3081	137383	143263	7230	5243	7326	1978	5473	6189
212	2241	1256	5145	7802	9782	9048	23248	32644	397272	1108479	55192				225129	85365	100684	13059	47971	22902	2680	4284	443671	418252	29592	10610	7392	5326	2292	4218
213	1974	6282	3196	4772	5638	26785	19613	13666	203744	13110	1471613				598141	154800	44591	13232	2619	20709	2259	3203	79155	145257	25295	34014	11760	6085	1922	13404
214	2263	2981	1694	3314	8727	11267	2386	58052	118535	547177	383316				29902	286713	87445	10393	16071	13438	7143	3522	715363	116980	34478	13513	8327	9307	5224	14864
215	2152	3280	5664	2341	23222	13034	18939	40655	571545	925551	271350				2007179	275276	63868	12436	20248	2210	7000	7123	106459	2708	2340	17318	7990	7327	12485	4151
216	1328	3462	6036	10099	8541	13781	32734	100934	152385	383260	2310891				1392135	200404	95374	18476	54682	17769	14442	2809	61017	198717	171934	33740	7548	2193	2212	6264
217	1215	1855	2522	15858	8309	7246	65861	428069	525008	245352	1976743				1535980	83472	36164	40794	21550	4641	1858	2984	135390	350049	193850	5903	10081	1943	2813	14691
218	1668	1748	5529	2897	2883	28071	5713	24890	610467	573907	2652121				1378564	258930	5981	22842	21880	30949	3974	2326	141762	136793	19339	5897	8209	4312	6508	15253
219	1516	2725	1570	1602	8276	13773	22528	66402	336020	766866	96461				588963	145957	46194	43128	66326	5079	15561	9543	521046	293835	62337	15608	52035	9005	5300	3676
220	1411	1739	15972	8276	3561	3941	23063	245463	122465	756160	94301				60808	128990	36297	65719	10566	24263	2204	3790	405695	109227	26444	22333	3310	2419	5113	9710
221	2333	1913	12024	6661	13834	34944	21233	63144	142427	172050	825337				287221	113847	234089	26372	30871	25650	39275	2471	60919	133751	31010	17327	3606	4756	2411	2689
222	1499	1310	6355	17460	11084	2693	29566	109221	45286	106459	1663380				1360578	136873	51412	131950	28826	33429	5092	6752	95184	433373	27765	6636	8496	5775	3306	22509
223	2345	1409	2258	1555	4289	16627	20183	221915	182046	65002	400895				580263	364181	95100	2509	39075	4529	3031	4395	189247	146205	15864	19133	4582	2847	2289	15094
224	2195	4882	3665	21819	7999	17266	57505	49083	147512	80119	1003865				129137	106472	246134	8131	5888	17893	18451	4448	28999	36415	261293	25125	10872	4448	7168	4096
225	1504	2346	3374	4218	10646	45391	37063	10983	15326	1215315	874821				1427972	261089	44840	16984	25905	13780	6988	3151	172753	21883	49631	9329	7218	2059	3292	4728
226	1369	1777	4290	5070	13497	13106	52989	46195	337958	224741	783862				2594044	237128	49248	109757	9661	4082	1993	15092	220101	73107	23539	30733	14726	2707	3145	21088
227	1559	1821	1117	4670	25829	5895	68427	20184	33057	1116501	341213				322413	36788	18886	14276	23469	1709	2372	3098	675408	200737	5792	25018	4517	2767	9350	6556
228	1692	2235	7753	13255	16309	8550	7378	6779	471948	1534011	1753831				7491	100922	10169	92766	21364	7997	4843	3452	169053	31610	3447	23583	4672	12787	3814	3616
229	1520	4574	7018	3369	1352	3323	2142	42649	172217	230862	177489				2106521	802739	37264	37528	38324	8433	8447	2602	557425	459561	108819	33076	4041	4147	7356	32832
230	2803	3657	2084	2110	1650	11770	36697	17697	201081	1035112	2665192				1111297	149020	45046	41605	14014	21738	3799	5037	634828	302004	7124	10698	3157	5922	2415	6099
231	1762	1663	4325	5511	9913	35263	3043	405347	110488	307817	704636				1702037	552976	11943	99226	14485	21662	10686	1934	157966	243383	30681	29162	4653	11005	2589	3868
232	2727	1247	2240	2291	6832	5584	19036	217190	680952	64807	173098				1623358	2525	30993	88660	45872	38577	4214	12928	48165	82173	7955	1812	14768	7566	14063	9367
233	1329	2380	2698	3867	19916	4039	80918	32015	354047	30743	2334340				93708	101846	196189	26405	4300	13985	20720	1766	324988	166478	25586	11210	3490	4980	2389	2812
234	4325	3797	2343	6307	19305	5502	4409	228288	300525	99492	5839420				1696849	12883	9173	26235	11893	9064	1444	6585	88092	23981	11414	7799	4384	5304	6316	2418
235	3077	1309	4868	9139	1944	36495	45763	26067	218800	430471	1520584				98404	199520	121203	64008	14491	19259	8638	4864	520070	216936	52337	4731	10000000	3780	16464	24753
236	1659	1416	11951	5621	10737	41187	19339	40555	25001	214838	133126				432720	137769	97999	12972	19276	3593	5533	4925	602968	212636	30154	37181	10000000	7516	3944	3114
237	1836	2603	2765	5466	16890	1802	11464	112611	10668	914426	538876				1465309	62861	47181	9113	6423	5367	11838	6751	730179	109920	89692	85167	10000000	1898	9096	12570
238	2411	4415	2332	1398	3049	37736	25005	219603	425105	97963	229213				266091	68478	126763	28169	21977	16145	18598	13723	161401	50145	6010	32113	4769	2704	3935	11588
239	2429	1871	1519	4857	20826	23621	35287	88248	5545	289515	604610				1222322	77359	35117	24069	30124	10564	6212	23412	145631	349027	34121	23635	4213	4378	3317	4475
240	1390	2118	3303	10064	4245	19501	4415	16984	144008	69017	418686				3844	51311	83089	46995	5144	4442	3180	11937	58771	16274	72174	12025	14792	6007	5558	5855
241	1425	2009	1469	3649	13285	16194	19734	68097	292063	895984	2496544				733453	483672	174524	88486	28070	2592	6994	6542	68149	40894	16335	25243	2340	13785	4052	3439
242	1158	5465	1870	11669	12901	30584	33331	15504	100186	3524	1295339				1730065	108742	162446	40711	39321	1685	1406	2132	447946	38975	4001	8983	3591	6178	14057	4915
243	3507	4126	3321	14237	10563	18003	55049	15284	138730	43497	551573				520332	655319	295407	5068	12310	12740	3388	12769	30080	16855	59974	3685	10000000	4073	3038	8070
244	1263	1554	2071	2391	23155	15424	4608	186093	254793	391846	558162				297330	2610	115638	45128	30745	15446	6873	3695	345235	28129	98561	6201	2882	12007	6596	9264
245	1684	3792	2263	12613	3467	18725	73814	33196	81719	485775	239411				133907	119301	130632	96055	14346	13892	23888	3675	393051	7362	13119	8713	15718	9550	6569	4777
246	1282	3889	4805	17414	16587	1952	34352	4537	327755	147494	157711				740427	83346	297175	7895	25766	4333	9138	1935	36963	43782	14629	5844	12142	6510	3341	21196
247	1206	4261	3597	17895	14683	12160	80617	80903	340173	1112708	4122412				500694	171299	12141	59948	14015	2075	9811	9085	184794	287077	6138	13039	4215	7670	3060	7735
248	1601	1252	8186	2771	2310	4068	14591	20534	309234	609410	2693396				507774	11454	14725	99025	7925	8231	16352	1824	334870	34524	39531	25677	10000000	2503	2738	6205
249	1953	1772	3842	1942	4911	1469	48734	87936	376604	369762	528326				1565819	285780	57399	128145	5421	27524	4632	15289	271047	11234	24637	25674	17961	1914	6319	27488
250	2638	5839	6282	10461	1405	14860	15362	40773	228866	452462	4566636				172638	113134	63807	93648	1923	19535	3344	3324	189329	19475	10185	1589	15538	2032	2056	4532
251	2460	2926	7760	9187	10828	21882	16314	24317	176277	2047928	1416585				2172765	398745	30404	32090	11787	6237	9534	18410	74340	97895	100124	16756	22151	17484	3190	5953
252	1410	2476	3020	2617	6751	13376	36703	6332	199657	50861	178113				454301	251128	99919	169350	67569	5034	1896	3684	159067	118997	68990	12371	12059	2449	3544	9230
253	2079	5973	2530	8017	4857	29410	23455	206984	161085	88398	1098828				2435206	267253	16650	25044	38633	26334	3831	2155	148190	94765	2176	5096	20857	2377	7881	4452
254	1305	3905	3320	18270	16842	13691	8821	203380	351645	23386	365132				450027	276344	74020	23349	7654	4621	6154	6561	414187	69249	10127	9423	3576	10031	13991	10503
255	1509	2600	1302	5679	11162	27101	23428	40627	95757	1259484	11228				2292252	14597	41035	6513	5736	13297	15415	7170	69712	119527	4128	33837	3884	7931	6714	10365
256	3400	2367	13660	6793	15791	54368	9039	11622	8695	103590	429108				70545	47043	10652	10619	12587	9375	1883	2564	200309	353685	12542	7574	4432	3703	1581	5010
257	2709	1369	2388	3789	15430	51104	21131	9097	18152	291814	6267597				901347	162535	362117	16410	2427	17614	6273	11795	226342	28776	111303	67060	17260	3468	16394	7319
258	1413	3854	4132	14817	10484	60518	82718	44889	101334	197432	2257847				461923	74978	62822	66152	26495	4027	10142	11392	15747	67247	16057	2404	5339	6094	6514	2931
259	1361	4276	1442	1214	15955	12333	1558	142853	36039	192932	3080209				2830823	56309	32071	74388	12533	3427	35545	7800	39367	39160	98333	14576	25344	8293	2814	36300
260	1408	4908	4507	4108	6275	4683	17017	40891	17742	775337	715538				32054	15913	1663	11244	19525	52467	18441	7431	435669	63629	10507	6020	9331	6626	2447	12040
261	1769	4417	4491	5861	14841	36609	20540	108465	236766	131956	603847				922752	156153	50247	71967	15022	2092	16198	2195	224124	308835	14020	5684	17636	7374	2782	18068
262	1869	2417	1266	5598	26614	13786	23513	2576	26405	843914	136603				1402273	548125	3391	8061	101451	22004	11063	2216	389924	400267	11751	5657	9365	10257	2112	3369
263	1479	2913	4262	8973	14278	18130	5011	245283	92384	1186469	1941753				513973	133206	149328	130207	22851	15019	4502	4548	153282	98727	10642	50182	8762	14250	5313	14573
264	2259	2652	3122	7203	4569	14012	78476	439805	37951	1515898	505165				681653	857965	15442	10398	29491	5480	1433	2587	308436	106929	3329	14164	12164	5153	3184	18297
265	2217	2701	5641	3120	17969	6705	88571	18740	148850	2008979	340668				580795	378967	16139	123784	6888	1543	15137	4298	1280772	116952	32846	30305	15117	11389	6418	17396
266	1265	2769	5028	15065	17953	15703	20365	14731	47346	477702	229791				855723	25525	109170	2224	13667	30013	2027	7528	81122	54844	110398	20095	10000000	3606	2283	2617
267	1435	4086	2314	10270	11638	21775	53266	41610	63275	654472	2896030				228475	373052	16176	25916	7605	19482	41413	2999	386039	108096	34489	47203	2904	9351	1676	3895
268	2802	1455	5883	3452	8812	13328	9501	259779	4844	700360	3000631				860871	16815	180454	54743	23519	47945	17854	3387	109557	184850	25564	96171	3348	7461	7147	8653
269	1347	1916	3610	10473	4164	3166	21842	40469	37725	218568	1209345				1253107	247984	93642	13927	8835	10662	2174	1256	91857	5703	6226	5889	1909	4105	6603	6394
270	1466	1355	1328	10230	6328	5182	51985	3910	41999	158138	1192034				276880	541335	218697	58440	22756	2053	2988	2734	444673	273490	100704	18063	2507	3602	19679	11453
271	4502	1640	1278	2914	17261	111690	54425	7648	288862	367849	1934975				665964	353637	8901	53846	5236	6585	1880	2762	237546	132800	5420	13877	4943	6071	2171	2836
272	2027	2313	5324	5120	4313	79959	35990	270962	112587	70686	3591587				929502	68669	86128	33438	17819	82825	8550	10728	91641	6549	8178	11919	18599	2970	2668	6207
273	2406	2778	7423	5892	41386	8771	31241	199805	403827	640331	750336				1693830	100272	146658	102788	4059	8334	27034	2615	105499	281086	71673	7614	6030	3090	6038	11782
274	4037	1992	2874	13823	12441	5792	65135	20231	301258	243546	2268375				486920	24093	176817	63824	1925	23281	5836	8341	42723	8343	19742	11176	4057	3527	2779	12375
275	1431	2560	3686	12189	7207	8613	2413	82329	336423	573767	392357				245613	1092305	49945	6430	25351	21345	4732	4863	109422	700574	15716	6047	5271	10679	4939	9281
276	2511	1684	1390	3337	4546	14431	4535	20969	125484	327282	684347				2359090	131626	19603	15217	28419	6067	2110	9588	640547	85669	62064	14862	4862	2798	9296	14676
277	2555	2127	8625	2426	5597	7853	34092	37777	57739	123222	1962094				1854500	8658	88079	4921	22544	11707	10390	4331	123938	21826	19145	1496	10000000	4316	2911	5850
278	1732	2231	5282	8952	5141	14746	6282	80118	228707	174996	1263040				319065	595959	63185	191011	2411	5124	2146	1464	74515	6747	27622	9001	2282	3389	3724	10059
279	1814	1782	2324	4763	8532	5031	70314	24543	301069	1671473	3350196				1023753	396839	152446	17127	11958	4395	7484	7158	119855	242279	106811	13497	27742	15908	2065	8965
280	1667	1538	4041	1642	3573	6161	4060	32798	715808	942055	475028				1183431	183866	35246	68676	106618	10223	4304	4292	6378	106082	23455	18100	20903	4858	8527	7593
281	2107	1317	4273	4638	5877	58741	22730	41312	292036	54036	3544717				1178392	329009	85352	26672	2862	10426	9248	3770	84718	154727	67680	4144	13231	1287	4749	5359
282	1551	1470	1344	3666	2752	20228	62790	39005	103072	10521	476246				127600	125377	112073	4513	33633	7589	2377	7269	278719	233709	21790	19894	32359	9809	9080	4420
283	1335	1418	2486	4968	4400	3728	12569	79247	258546	663455	403606				701044	263337	31676	146045	6077	35576	2872	7743	213459	108670	31690	27263	3968	3102	6943	6986
284	1836	2752	4984	2330	9554	9177	49214	77007	698758	48423	2810020				420692	203629	136440	9370	22375	3908	8418	5107	683909	166445	7704	2467	2681	3662	8102	11261
285	2179	3297	4390	3578	27144	1899	3638	7691	60195	2176678	234905				750415	33339	30104	19598	22124	11067	5029	4915	320667	148473	82156	4866	20915	11226	2608	10472
286	1260	2000	2362	9736	3652	9491	50473	11662	94221	655150	1178905				372500	16490	112829	33187	3591	18613	5443	2764	111634	13469	14604	38265	19101	6599	8844	11219
287	1474	4224	1300	22955	12588	46284	60103	18811	154602	684588	3100294				1213929	48426	83801	2352	63550	13120	6187	1672	587005	66231	21277	11185	2741	25059	3068	5145
288	2288	1424	6634	9104	13322	3053	29307	18356	1018231	685451	754603				281154	164174	169286	26793	2058	3003	5137	1690	498768	156587	127046	24385	3947	7645	7897	7179
289	2578	1459	1490	4012	18666	6694	33565	29709	18905	461307	240312				898133	35994	35478	72913	3906	26907	20931	1753	222439	56893	13537	16335	10000000	2672	3256	31194
290	3839	1240	1575	3402	17019	12425	53248	24456	87038	31943	2412				447415	64814	43966	2358	6390	28590	3832	10604	111006	39415	14175	1852	9784	7506	2046	6366
291	1610	1515	6288	7377	2669	8044	19123	60589	111024	117525	376277				2044564	191830	27422	20463	7195	6497	4605	5657	161228	98754	8906	3055	2782	2362	3015	23309
292	1911	4840	1647	5602	2144	6645	32397	198969	155377	2481	597295				1906919	467096	61571	18325	1773	14411	2132	11651	197077	208100	6249	26791	14842	6549	5345	12268
293	1365	1680	2175	23005	28795	19344	4673	164276	80052	3922909	2965075				684225	118181	22484	15917	6290	13026	12215	12071	11133	157875	11052	24240	5696	18505	3711	23354
294	2407	1354	7259	4546	27017	7921	90792	1510	39923	277885	23361				1199502	5270	25543	55467	13764	4040	12674	2803	240783	8380	24242	11316	10000000	12494	4132	8754
295	2304	1496	2518	5166	9151	3014	127437	210722	158955	173870	4397290				2186661	234277	48702	11216	17720	11590	3875	10626	92307	91622	40918	52638	1643	3906	8631	12127
296	1401	1640	6678	4770	5043	15708	122835	87744	125897	1263395	758985				148216	133409	53476	2251	69184	6731	1960	4476	261857	538629	85690	23214	12655	3035	6385	4097
297	2713	1867	2657	5256	2683	27468	55371	82963	34789	735280	754360				799720	224798	68760	66876	9139	1288	2311	2779	1157522	258081	49505	36194	3121	3132	13368	3100
298	1490	2827	1816	8140	11620	2587	19944	57011	166313	2305033	671204				1998822	295331	17317	67420	2836	6704	30739	18162	151917	154330	33962	20195	1787	6190	3638	16487
299	3427	5041	4801	7999	18177	30361	37791	13478	602892	295132	881320				1138517	35594	15218	18918	15581	17831	8604	14376	26638	120715	25407	26527	6242	6034	3665	15864
300	7508	2195	7078	13012	26441	16315	20689	27814	23323	428877	80247				260905	116147	114597	82539	9780	7699	12042	8882	1244849	79158	50233	14290	7658	6416	4275	14563
301	2219	1760	1931	8153	9336	23541	21077	136391	309404	2106874	1339347				18752	212196	103001	6900	8947	20859	2468	3880	141882	222964	9071	19838	14880	1507	1479	17253
302	1555	3336	6541	2015	11814	16780	19088	105915	98968	744368	66371				1872945	40102	34956	6873	18024	15232	2100	1632	23893	172932	4855	44193	5740	7250	4124	3920
303	1699	2993	22415	3076	15539	2296	95508	64282	111745	749250	2415190				1728913	8391	88023	89408	7525	14005	7724	2402	155757	3576	104915	19871	8880	9951	3915	17383
304	1392	2674	5142	5295	12576	14604	45799	392682	196882	26875	3801157				3602993	41972	237041	50174	1775	3434	9160	7213	373351	17007	54898	19157	17299	6433	2636	5713
305	1936	2674	2270	3820	21440	1376	2540	74052	488227	187771	980689				308168	116669	16971	16065	8368	2762	12782	3778	62029	23520	118178	29469	5412	13097	5744	7453
306	1383	4032	3457	11205	8371	6203	13438	62826	97589	270094	1303177				1663260	133017	20753	88675	55679	16767	11913	12689	33923	123138	98504	27946	1915	9124	10127	8776
307	1662	1388	3814	9350	6949	28961	177659	4184	192623	558927	2263056				101353	281104	96151	6930	35439	14804	10328	1594	264524	52941	19273	6187	7166	6379	4114	15228
308	4038	1453	2405	1613	4840	15528	16902	123024	178066	175847	97387				666254	105465	188729	25842	4867	7210	4148	1871	21613	497474	59166	15390	2485	1909	7747	4991
309	2197	5343	1681	2469	2557	1814	67002	18875	214293	43571	520841				15339	630308	5553	94900	4023	8448	16765	6179	279836	20264	3298	32582	12510	2839	5231	2526
310	2126	1329	2023	4591	11819	57760	42282	3797	423521	199497	752414				999646	192293	59135	75875	4934	4459	12532	5010	157779	231005	40559	8811	524844	3529	2715	6946
311	3038	1342	2476	1618	34573	45358	14714	134562	100285	591814	1545616				1353084	34488	24248	100284	47012	56023	11935	3186	24934	171580	40511	80495	9196	3443	2261	9191
312	2295	2910	5145	3508	8765	30163	57820	32644	21991	445280	1874137				1825	89890	5814	51112	18089	8275	3172	2070	332318	38403	87470	15985	14157	2788	2829	6072
313	2551	3910	3196	8243	4834	29471	33813	13666	34924	243625	539358				918473	120631	110777	8473	5472	13803	5427	2630	278903	85741	99611	3935	10000000	2900	7004	4180
314	1533	1831	1694	2620	9390	11126	25666	58052	40713	2567692	6198151				412765	107053	29167	11285	130498	9492	14318	5525	527926	270922	61762	15653	12760	3834	3254	7785
315	1198	3199	5664	9039	15938	12216	30556	40655	66660	805342	1960532				379961	134276	7777	3295	9734	32406	10014	3706	67300	2298	31842	7450	19298	3678	3609	11037
316	1861	5892	6036	8670	2702	5697	109285	100934	42745	727045	2011259				1207421	43774	85930	33761	9347	11909	14562	10414	298836	28580	115545	38638	4933	2417	3464	10604
317	2564	2587	2522	6728	21467	6509	73406	428069	180326	228587	3292906				705466	214081	43235	12724	8923	9673	13777	4454	312668	294633	27920	15377	7724	5807	12555	2081
318	1723	7658	5529	3991	6197	30650	168618	24890	31487	206089	801440				1051764	196449	20996	33760	19801	32063	9871	9725	138518	142178	4954	16086	6815	8671	11309	6110
319	1778	1893	1570	3668	4691	13125	37485	66402	1024228	1121470	1253557				389600	117722	45534	11933	8950	13953	2640	4237	707957	4234	4162	13022	8781	5163	3078	3985
320	2480	1755	15972	1614	9161	28541	87581	245463	66403	423830	1641850				9589	41841	197131	155923	27113	17778	10763	6156	415009	369153	41717	14851	160072	2697	9130	11780
321	1701	3639	12024	3444	3452	15226	6546	63144	108594	873015	45903				1238471	15413	134632	14727	19306	1943	6547	3449	192512	144617	6644	26623	6909	5751	3093	17411
322	1196	4598	6355	4144	7910	10033	1818	109221	641833	238096	664700				68295	48547	13325	32791	2491	2838	34546	2137	29185	55810	11396	3919	13481	3931	3968	8572
323	2526	1459	2258	2517	1901	21307	11811	221915	123442	110438	3157461				1565251	420444	19988	102722	27724	7300	9438	2744	157921	113084	3537	12684	10553	8003	6786	17582
324	1761	3576	3665	12559	2592	25671	7115	49083	312063	3798949	161238				1410	139612	92446	38343	3917	6163	1296	5115	350464	11329	36848	40768	3093	11583	3481	27059
325	1354	1986	3374	1605	15056	4973	27806	10983	19447	115715	2998062				795009	102112	19441	22787	10698	92267	1685	2060	149066	29707	112215	11285	17741	15753	4480	23309
326	2155	2900	4290	9076	3410	6225	150845	46195	214249	217581	6262908				2258838	394843	46294	61664	20388	9763	7782	2368	114830	29183	44012	14864	3815	2296	3052	8110
327	1420	2458	1117	2776	12409	14793	17553	20184	1691017	451805	984614				399543	506990	125016	77441	20268	3377	2356	1363	177126	204644	11490	3886	5158	4929	11062	3336
328	1945	4522	7753	14902	3947	4656	226895	6779	135493	1301998	585984				1497782	9680	2983	3642	6313	2134	14862	9644	460436	148051	14946	50712	6943	8450	5329	8877
329	1225	5302	7018	1883	3996	14861	70304	42649	29733	162632	972563				101968	54684	144213	8129	27836	20785	2825	6195	366353	39132	10266	84497	4123	8358	5515	14985
330	1367	1598	2084	6798	30058	20928	171290	17697	172463	263820	1709444				307562	39228	69350	33098	20609	21664	21107	4276	633923	188826	45533	7425	13858	6689	2707	25774
331	3005	3842	4325	7748	5023	4112	25452	405347	116308	821155	2194850				1530828	190898	92694	23542	5906	4994	5063	3971	204600	54389	77056	10915	2156	4023	6348	11368
332	2000	1384	2240	6836	8357	27125	16833	217190	383386	848530	516498				34381	83419	183137	14593	16469	2793	7657	2956	643094	226856	14120	14099	21014	5724	7432	9105
333	1409	2632	2698	8939	3022	2923	119436	32015	385135	112890	134644				329980	54164	338388	67724	18864	9282	10854	2591	46828	242520	15626	50571	10000000	4659	6090	2882
334	2650	2462	2343	2352	5948	6851	28677	228288	71758	579249	852353				243991	325341	13405	103823	25434	4937	7015	3087	124034	85993	7164	2144	2107	5199	9719	4481
335	4436	2958	4868	4901	35973	2185	38065	26067	723316	388007	755559				28099	16624	155702	50838	74979	16568	4154	6112	151052	335817	22660	43243	2531	4576	2794	6071
336	1796	1563	11951	9177	2113	5252	74914	40555	54841	370971	748182				875838	345578	157609	26509	47190	26159	5600	5863	41148	271775	12763	24071	20134	7715	3870	2478
337	2038	4717	2765	12649	34278	36620	31755	112611	435406	927881	801907				1483197	217144	23598	32888	1474	22365	5989	8474	237087	169960	47219	34367	6326	6408	3723	21239
338	1748	1425	2332	1736	4558	1480	207478	219603	79784	848226	5124683				8328	65506	120488	21392	5281	20897	5610	4704	108116	35579	32536	44298	10335	4706	18070	5564
339	2490	2824	1519	3364	2916	2352	97230	88248	73150	457306	44896				168400	105269	32583	10248	6599	25535	1826	1587	48336	108805	35874	68966	21598	2008	2291	15002
340	2394	1277	3303	1833	2982	42143	36502	16984	576742	2129417	1009928				94445	347479	218630	40157	43871	6646	16975	4979	158164	258046	12749	7784	8910	7581	2276	8837
341	1794	5472	1469	2889	16203	22310	43824	68097	11401	828689	1005434				1027883	112017	4485	58995	24954	7433	5346	3848	362670	63334	153497	4494	10000000	11498	1891	11838
342	1804	3100	1870	6502	5883	1915	7362	15504	379114	1072431	1316372				45347	46977	50824	24546	55440	4223	3037	7729	7121	322325	38685	3598	11795	6772	3405	6753
343	1327	4346	3321	11693	9766	50056	90681	15284	30177	120200	2052976				1059720	158228	203456	11089	9807	2184	7668	19907	1686679	201871	13366	5646	5192	5475	2549	3563
344	1384	1466	2071	10665	2382	5176	45970	186093	205053	257088	4588893				508566	17421	88992	5957	18446	8844	2177	4349	28612	172547	28939	10429	24232	3978	9247	3931
345	1737	1386	2263	1607	28021	26739	5017	33196	84102	780166					247675	71114	234203	48165	32343	25279	14064	2634	582045	159356	76080	20599	5480	11789	5644	18509
346	3158	1361	4805	3962	1559	10392	68288	4537	283609	123048					120538	538971	173923	10520	6424	45120	42739	7858	617485	85828	22369	2298	5924	2556	3649	7904
347	1823	3306	3597	2136	18223	24838	91795	80903	179980	334810					316800	211324	36038	90574	2984	15959	5284	2818	660290	72726	54326	14315	14298	7597	8841	2888
348	1387	1262	8186	1819	7259	66750	3836	20534	607458	545924					1281003	86081	105881	4326	2451	29696	1735	5765	343602	239582	18068	3200	5639	5642	6677	33575
349	1490	1501	3842	3009	2979	4547	8557	87936	97788	758622					689350	67366	91445	151869	11853	20916	5849	6313	43377	196507	182068	41221	3274	2550	5773	3491
350	1251	3571	6282	8178	7802	36015	23908	40773	511660	399038					1646294	158269	3405	6223	11034	5781	11776	6904	489627	298913	6117	17178	2922	5523	2737	10702
351	1459	4711	7760	5335	6094	4395	90560	24317	174087	1225362					691572	397924	181691	2223	12132	6060	6160	8232	82489	339209	18213	39307	11250	4616	2460	7765
352	3679	10245	3020	1454	49525	18389	69470	6332	39100	464235					194267	158705	170548	9985	29731	2962	7545	6636	98065	273429	15441	7982	7714	2837	5986	6105
353	2750	2364	2530	3730	16524	15670	11018	206984	10927	94704					660083	118555	379137	1544	74236	5307	3915	6245	50508	84337	31884	3044	10000000	5052	2966	5169
354	2657	2341	3320	4895	14368	38451	56763	203380	375826	251796					230850	84193	17507	12329	15781	33356	1571	1353	34232	99615	25615	14962	3226	11445	4718	32890
355	1872	2052	1302	3320	6684	30065	12442	40627	114249	216345					675142	15883	33388	7893	30092	12073	16782	3866	182152	20947	4617	26205	12479	2875	8225	4261
356	2001	1282	13660	7283	16649	17129	33045	11622	80663	1287757					1236039	44700	686118	27126	62567	2950	6619	2481	14885	50807	2986	5959	20998	8402	5481	9853
357	1494	3037	2388	13225	2196	5187	85222	9097	23543	665506					614746	72534	15336	96608	32380	12899	1559	1645	831581	9237	36849	8144	3409	2675	4263	17329
358	1477	1568	4132	3071	11554	36814	160339	44889	95041	1569531					1685194	193620	278189	56802	25322	4693	2771	6590	99882	79183	11281	4814	9597	14850	4233	23332
359	1723	1966	1442	3960	10742	7607	38442	142853	250686	567399					38870	70813	96977	183374	15187	14986	8912	8458	17048	197854	84803	1754	4474	3652	8279	20255
360	1635	1685	4507	1285	12168	30213	24540	40891	143397	576438					128230	44118	13921	29389	3360	10648	28340	1497	538593	57131	31906	35900	10000000	10000000	2372	13388
361	1233	2040	4491	3505	6503	22380	10158	108465	40816	2101092					2114304	261311	5968	11497	7781	26492	1574	6272	4738	176127	73676	50509	17113	10558	2548	2007
362	1869	7073	1266	2976	4464	3428	33038	2576	290664	154140					13912	63801	19324	4602	20096	31609	4390	2056	311596	71516	36190	42643	3904	15019	2450	42379
363	1521	1197	4262	7655	2711	5589	4204	245283	27111	443338					152733	56435	14723	22102	14779	5736	9050	7763	159238	244504	11598	14410	10000000	4747	7250	10000000
364	1890	1912	3122	3864	25833	17023	14249	439805	154841	158621					555401	96724	67627	13932	70625	23420	8305	3991	57844	355489	30111	36616	10927	2492	4534	10656
365	5682	1839	5641	2654	14044	14435	41550	18740	11546	895619					540938	12895	5013	35163	20589	26934	21180	3246	1213540	17306	21832	45632	6516	3961	5435	8450
366	3349	3218	5028	8353	10035	6041	11210	14731	330603	460403					421215	99940	69082	92923	11727	22582	5810	1422	66682	212561	58929	43465	2636	4828	5267	12064
367	1537	1244	2314	3628	67389	38284	6064	41610	253226	2844170					983746	488307	69717	7322	31733	24359	1456	2398	47054	122929	10609	28424	4875	3219	4361	3191
368	2571	1729	5883	7441	10494	9832	23776	259779	573083	257343					2390274	208682	84033	39631	20103	17944	2829	4182	61262	281453	143770	61315	2693	6555	8710	6783
369	2063	1394	3610	4774	18495	102038	13640	40469	177905	619295					736359	503497	11201	132095	1778	29884	20931	2666	541745	302697	13575	22447	17886	8566	3960	9077
370	2044	3561	1328	1798	10649	12581	2732	3910	58128	268802					435753	226695	53604	35105	18330	16626	20893	4064	869244	112482	25909	9510	4268	4431	9099	4524
371	1333	1524	1278	4124	7315	64005	117822	7648	37894	656271					1274585	309326	219087	49883	3784	8315	3362	7289	76868	144516	27545	28614	10000000	2351	3610	4341
372	1551	1436	5324	1779	19860	17567	166748	270962	76564	153095					2170898	80620	214400	7217	46646	5068	8729	1649	1110397	17997	49601	16715	4558	8694	2838	5238
373	2003	2583	7423	11094	7776	26027	61735	199805	889418	64910					212426	51160	69633	11499	3206	4047	6916	3027	94932	88721	204976	14670	11001	10520	23160	18517
374	1289	1593	2874	11181	11179	74662	15003	20231	14508	184833					1093813	27912	39601	89728	12882	19729	4493	4066	17708	36933	2789	27377	19034	4152	6313	6473
375	1363	9166	3686	3053	1808	1921	1633	82329	216778	439210					121933	93006	63221	36738	14144	24436	15509	6955	450226	161555	7959	14021	11220	4724	3056	3067
376	1651	2561	1390	4996	4781	2741	26564	20969	46138	1477293					258560	47005	146478	6279	60825	12829	10899	3350	143738	72615	40836	6796	6813	6490	7074	12514
377	2297	1475	8625	2000	5685	5068	44668	37777	465449	158794					2680692	87051	121015	37039	29504	5543	3007	5352	417763	28381	69602	6622	6116	4968	6660	6419
378	1705	3595	5282	5925	37364	32323	17069	80118	609976	842762					614914	559986	38254	42462	34365	3611	2631	4500	530745	249318	40460	30809	10243	5727	2753	2732
379	1343	1967	2324	1355	13149	5679	91892	24543	493070	1544855					467129	90038	29083	57317	13469	10545	6799	6536	1034164	2369	55569	65926	10000000	4851	2663	14379
380	3794	1600	4041	2819	4921	5356	36916	32798	127814	520170					1189093	166883	228312	167934	72873	7964	12241	6040	151402	41540	12193	29124	4187	6087	2041	6801
381	2188	3131	4273	4353	5342	18933	25941	41312	31031	63397					1771196	226718	8725	27461	12277	5983	8614	9203	489581	78097	56453	43734	9078	2164	4398	16568
382	1763	7267	1344	4956	11112	31006	59160	39005	95703	77015					49072	15287	94370	64413	11486	45328	2418	5998	1156176	293426	45367	7637	7827	3935	3192	4073
383	2193	4095	2486	5303	29440	5605	25034	79247	158621	172809					343790	670738	135121	2018	4370	11214	16132	6289	143149	166704	16036	10622	65142	2151	4968	14823
384	2607	1490	4984	1485	2824	1684	16763	77007	140593	635935					274485	181486	59914	12281	16416	2825	2272	2544	152395	269055	3260	42894	1986	2736	4018	8832
385	2529	1940	4390	7254	19038	18919	7713	7691	202945	33362					253199	21573	96448	87389	52914	31539	4826	3440	409576	254816	90305	39493	1485	5497	6028	9384
386	3387	1468	2362	5087	11103	13067	100647	11662	343507	865011					354717	272552	153453	14910	3380	2394	6440	3384	437470	183704	39691	21710	12562	8222	3096	8371
387	2244	2802	1300	3130	7211	8587	42325	18811	28013	137038					1527131	14015	12542	81624	2796	7687	12613	2712	144585	34945	28826	7456	3191	28079	9395	5152
388	1315	1825	6634	2368	23104	82396	9956	18356	95571	147556					861794	79348	94692	4385	13327	28771	3073	4162	151075	36412	17110	25884	10911	6288	4854	11352
389	1247	2324	1490	9712	8552	25751	6899	29709	25656	252273					638560	600659	213398	12221	3971	16272	6566	3114	39930	344660	51237	4914	4226	8681	37989	7087
390	2078	2314	1575	1867	5746	6209	45036	24456	23763	35660					26791	26143	57853	11521	17192	7580	8653	1783	226129	75033	29094	29721	11605	4917	3435	10536
391	2243	1472	6288	1627	14609	11879	23043	60589	330315	14088					1759457	722073	43272	21095	31708	15753	13076	3184	81208	174004	44161	66367	21986	2025	3907	4825
392	1645	2758	1647	13511	5412	75188	77706	198969	543043	172328					207261	85813	125397	33455	51730	23789	13706	1602	369024	126425	46559	18752	1793	7369	2589	14616
393	2171	1489	2175	2330	15293	6868	47700	164276	16582	216737					398360	123719	117071	101700	16968	3135	5751	3752	107362	200108	16499	28290	4898	11955	2619	8049
394	3745	1447	7259	10786	4735	10592	30091	1510	25133	121334					392787	457364	127843	34772	17615	2848	7789	1900	97568	103662	25216	9543	9012	6495	7510	11195
395	2508	3492	2518	4039	10797	5099	50692	210722	23528	784516					380461	341533	138045	12263	2526	30012	2749	7643	134133	92811	4839	58506	6456	1927	2798	5471
396	1625	1880	6678	7227	13495	9528	8502	87744	75212	606356					1004351	6729	192656	14800	13803	5023	22754	1821	810384	35895	195506	13821	5797	19052	5307	5448
397	1463	1207	2657	19716	6514	23826	10405	82963	34179	610286					102996	32925	121547	9658	57765	17877	12124	5262	246101	183469	57961	2860	15278	9879	3468	8885
398	1443	1545	1816	6755	1903	12457	30151	57011	486291	159368					208616	82691	39023	48807	16420	34794	19944	5120	257257	189660	98973	1695	8806	3362	6178	5182
399	3664	2927	4801	1913	24142	6476	1816	13478	153804	1671583					406608	99218	154112	34694	54921	13838	8761	2457	50869	376111	21821	11531	10617	24714	4054	6437
400	1197	5547	7078	8217	4149	3554	3154	27814	84440	87895					681310	216643	74389	11849	71627	4067	5935	8662	119887	126075	82555	2095	14902	7705	3568	5841
401	1164	1245	2551	6199	10297	20032	167998	15346	272154	216527					997458	134895	54840	119600	5039	1744	18724	9057	269111	115454	9275	13372	10000000	7576	3824	20136
402	1399	2553	7105	6615	23782	94773	53725	149088	325005	616851					1393055	158457	26642	4676	30527	14541	13519	6756	107491	294165	20740	2509	5877	5765	18488	22824
403	2252	4126	1844	20176	5891	23219	16096	57690	408686	622788					941130	28456	59887	12086	15791	21004	9734	4463	45882	86836	61375	13819	3477	9404	7483	7009
404	2922	1561	2231	15981	10450	19021	124509	344126	8211	590504					1048474	80444	4096	78473	24288	4556	4753	4357	34454	280757	41242	22017	10000000	10876	4339	2625
405	1471	1498	2518	5305	14489	41508	63947	220279	439730	970057					289636	62906	132546	9808	40209	11868	15129	2235	77235	182485	19356	5438	43442	2597	3224	2177
406	5774	2253	10884	8409	2260	64875	8152	119770	289418	617030					10109	433199	115708	18235	22941	15055	1957	2806	457428	184600	76385	86004	19036	4759	4500	6240
407	2148	2908	3465	5445	8632	25173	25693	21770	309275	420360					1627195	394580	333872	56372	8912	22231	11138	3094	718399	301192	29299	32084	18158	1711	4241	7827
408	1116	1334	1357	1350	4172	17816	103309	68378	92259	996108					1281394	536697	25285	31294	34555	9543	2782	12932	76475	113077	109826	8177	3420	5548	2964	6282
409	1590	2327	8082	14814	1786	37790	9988	132645	32395	180193					762821	772970	51177	13683	14284	18082	8488	4905	125392	265150	91973	32740	2125	4341	4450	6456
410	1157	2903	4543	6218	61306	20827	52822	647190	187240	782839					568214	7691	176731	24435	77467	14230	9211	3554	178780	139524	18559	6801	13081	6885	3024	13459
411	1725	1767	3452	1547	3280	8397	17789	28182	525154	961482					363098	276941	101447	12335	2361	4663	1942	10133	308504	141666	6468	21805	15009	2664	2792	29222
412	1538	3132	4516	6491	2144	8136	42422	186186	108748	146489					693891	140995	105556	92572	1741	12964	3492	3494	599266	61610	86191	37541	5578	5767	6865	4885
413	2673	1210	3672	2399	2654	3467	121783	10772	407090	789603					1790904	123383	12847	16330	17996	7678	15567	3850	1388573	142436	16165	18847	2858	2350	3579	14324
414	2268	1421	6904	4160	5543	33516	70394	188809	5612	174046					714321	149320	128639	97618	34444	9144	6919	5579	124183	356395	42957	23016	10000000	3853	2242	10032
415	1547	2152	3485	2249	10861	13401	38196	25993	179857	337073					152770	375841	197350	12762	12560	3769	2385	2110	395604	111628	48467	7255	9518	6270	3516	7083
416	1396	2795	7426	1584	4123	25707	1898	138340	119196	1682817					361396	23739	22583	52943	148009	13981	23198	2736	65382	336045	24010	38945	1742	4683	3878	38442
417	1589	3425	2248	3197	2545	5035	31837	82382	27471	799510					2240167	881557	70436	16309	15802	1612	3907	8924	209978	268655	28310	36706	9133	6786	3544	4261
418	1551	3045	9371	2255	3206	5319	16834	73784	131603	889250					2932596	7243	83817	4932	9504	32204	12767	10822	8931	63193	8229	13109	3929	2153	4938	3717
419	3348	2725	3236	1586	11674	19030	235229	19304	122967	1307903					1991827	338908	48846	16726	9212	19528	20073	7071	230178	11239	3801	37697	5573	11405	3031	5268
420	2936	2031	4783	2732	7025	21547	101941	50544	618735	382768					1248009	39027	139188	19552	3885	2267	2251	8067	522007	106836	1996	27217	4919	3150	7742	8538
421	1467	4368	1310	5267	2204	4959	136299	376935	145976	26905					708075	98173	154029	23253	14643	7648	17706	8057	209707	37011	25068	33246	7547	5145	7496	9991
422	1268	2781	3696	6495	12548	4771	6536	287781	152674	597085					1706083	40418	24495	30094	15407	5401	16227	13539	399133	24513	28713	19605	2842	3210	2577	3732
423	3602	9159	2068	4651	7145	18175	9048	283376	220679	128630					748923	7981	9499	23041	4632	3335	3261	2650	660942	180969	95052	3342	8028	2140	4117	5088
424	1571	5992	3520	5209	40240	15283	140863	45416	171636	695253					193245	51154	353435	78194	4547	10621	18165	2485	218092	20630	19824	10980	6552	3729	2815	16309
425	3732	7517	2100	4941	6472	48603	30270	89099	7284	791838					282550	103504	111648	2328	13961	2713	31277	9473	45007	20517	76649	18657	5985	8882	1659	9091
426	1556	1405	2126	9570	5813	17859	7494	114635	324429	1034029					1394538	656410	106391	72215	67028	2937	7276	6495	332738	54246	52156	52644	2463	2992	3637	3075
427	1209	1818	8006	8972	5674	4341	95856	160934	139416	1914675					2150388	262087	31315	62485	16078	19606	4164	2363	43382	110492	29802	1639	3191	7376	2884	3706
428	4060	1717	1339	1730	4340	17496	121492	303548	248081	562938					798666	346941	62800	135386	10079	10524	3223	4042	375103	77511	33931	31499	3927	2648	20733	5760
429	3215	1492	2414	1481	3744	13976	1573	16453	154013	496345					883252	6573	38235	3816	28316	25693	3603	11289	43352	346027	9254	34332	4839	28663	4853	3285
430	2890	1273	3544	5725	11968	24203	79732	120295	39979	172127					2070762	486469	32643	15988	6958	14149	6468	5664	81872	209163	43934	3213	3422	3333	3314	6160
431	2317	1436	4986	6398	9603	17721	23146	51270	212105	322822					1807068	9702	82395	19132	7391	2949	3355	5702	64905	77767	7180	50044	7365	7989	10214	11865
432	1950	6938	5277	16924	3685	22890	24954	117440	32579	654751					1685677	47866	259862	50781	18901	21252	4974	4217	648438	86627	28324	7041	7269	2562	2563	2974
433	2206	4066	14584	23407	23296	14437	6237	91451	48747	329716					283785	126686	97120	29448	50284	1495	4507	7052	142362	419096	55612	12459	16742	3399	3869	3052
434	1527	5385	2414	10388	2714	27660	1853	109758	265479	1516491					1477296	127469	3105	14029	11164	3428	13497	13259	2261	11086	19863	15716	3941	3207	6798	5523
435	1482	2047	1161	13930	4112	20507	77265	64113	85349	140773					152013	102211	144339	192271	18747	9205	3102	4800	12382	8435	45456	4809	10000000	2240	8647	3316
436	1446	4308	1827	5265	2964	30469	47153	68960	534234	3301					310933	510028	97015	3194	17223	9755	17670	8192	297481	554547	46366	23895	10000000	2758	3441	6482
437	1420	2377	2168	2723	4180	47715	40023	52740	288404	278726					2687095	186947	10900	33927	14301	2433	2726	3303	139670	78719	3463	13217	24733	10078	6311	10456
438	3342	2802	1871	8585	4010	10017	50493	175824	184216	641459					2445626	98006	56343	47445	30121	8108	3919	3625	65269	272906	51778	15132	13747	3104	3831	7675
439	1825	5155	5311	9894	6471	16053	56696	61354	73488	1035720					2132581	15354	9087	18868	1681	10107	19441	2091	697459	164672	44358	18795	14434	6093	6675	5217
440	2604	3691	5692	3133	2009	4347	19200	114056	83075	818586					1316974	413724	27278	94088	7114	23443	7183	5631	168109	784474	83183	49869	2752	3496	8211	15188
441	1929	2733	3834	5570	25303	12952	2211	56440	567068	76142					155665	68443	11840	163141	20574	4554	24844	3984	11189	30064	21078	43149	8773	5534	2761	2746
442	2285	1506	2432	3725	74608	24418	92132	209022	176357	348310					31720	314670	31987	97718	43539	29772	17812	3665	61297	82281	45731	50250	15930	9252	9583	21751
443	1388	1966	2481	5684	5077	8030	40878	42594	21724	224251					648735	114643	3208	35607	19379	2337	9419	2312	467183	735805	9035	12700	12488	11605	1785	4770
444	1449	1524	5135	2536	27959	16426	23866	254763	43952	1361877					341556	183775	48299	8467	57893	4663	17320	2447	634107	228496	6215	14123	17641	4489	2836	28009
445	1689	1718	1263	2958	13469	4848	3393	86026	410123	1415133					29397	59898	36274	21262	15531	2546	12230	4509	1376627	138563	7712	31518	7648	6319	5723	31014
446	2989	3908	6643	1778	4685	15291	30730	40111	94451	478262					173046	267174	20831	62374	10544	4864	2027	2503	1268600	16747	1670	3486	10071	12448	3883	4522
447	2542	3797	5424	16633	14782	7412	23156	63062	7628	91974					1039373	52252	42322	84638	13894	15507	18298	2083	136149	27334	18370	25574	9602	11743	2170	10963
448	1699	1937	3017	3384	39797	40094	13874	110005	186302	482768					503039	244576	6261	2434	12533	27778	11032	4390	42096	3976	6554	20718	4419	4836	14287	2613
449	2536	5141	3530	7366	13694	42191	35679	19534	360180	1518197					1814312	653622	32196	27810	65546	5923	7123	2879	970477	544222	38785	3340	10000000	3213	2563	11852
450	4032	5112	2523	9163	29010	7064	18165	470820	492234	430796					2836803	98874	11330	12775	3822	4677	5053	2264	3571	368211	76156	20567	21157	5260	5618	3402
451	1430	3021	3000	8990	31861	58829	11900	18769	33556	50203					171658	75875	110933	20524	7232	7271	25639	5396	527367	134048	3140	11781	18448	8873	6379	4911
452	1447	1252	3152	4511	2484	2471	29114	104533	39682	186037					2530871	97241	30865	33486	30321	7735	4504	3183	57752	68102	21078	8874	10000000	16588	2849	24319
453	1386	3187	7499	2757	6459	32563	12449	17728	61922	116268					2722125	22630	48201	12837	5479	8327	16992	2548	63595	13700	17430	30547	17680	2003	16600	11306
454	1598	2093	2853	4192	9754	53441	31693	12530	135373	983427					1846782	82254	159588	20953	14153	8407	1433	5034	577266	72522	10643	2188	4361	3552	3153	10687
455	2422	2139	2801	4656	2318	6965	9031	191967	17303	709126					450369	146560	23530	70491	54052	4142	9492	15885	52942	386314	12810	31232	18284	2302	2811	4896
456	1497	8573	5204	5110	13104	13693	6318	12567	5106	465404					46445	269417	45225	9846	28621	12324	12209	4916	743382	82265	19148	24512	1883	3710	6693	5206
457	2889	1691	1452	3905	6336	31296	62213	74489	67862	24212					909898	94732	69523	8816	10596	13067	5130	2944	628287	105872	37041	40118	13720	16488	4850	2472
458	4916	1468	4879	3036	2957	32764	47460	51287	28170	251390					415141	49883	32672	23009	22430	4817	5513	10541	12305	133381	154175	1851	3936	8924	1832	7381
459	5735	5741	5205	3702	9984	10903	14991	11534	189453	1218782					68765	10743	110233	76630	27014	6404	8901	3672	6920	350164	20139	25204	6976	9593	5761	11388
460	7589	2598	5225	4053	14384	82271	120610	5091	271798	486590					1075570	101527	78442	11277	21242	22455	12213	2287	212654	5924	1863	22996	20767	2479	3543	5066
461	2688	9452	2301	3697	1947	32353	48351	72163	651635	124352					996167	11499	285264	22378	22465	4496	26758	3703	341277	86393	82914	4632	3409	7430	10925	2758
462	2317	3100	2001	15385	26651	12329	36126	7581	28060	708429					2026305	4627	82135	71565	7516	2738	10777	17301	259178	216980	52208	3521	3774	19876	12152	6402
463	1398	2976	1903	8199	2818	8553	41191	21417	453759	370778					547456	196003	263127	147729	11825	4512	6077	1465	283460	53034	35158	27085	8427	3217	4857	7449
464	2413	4346	3266	4439	7791	3520	115294	46322	35747	38862					1034234	254479	85499	57924	9219	10395	4985	14185	17791	124125	7299	8893	10821	3095	6783	4127
465	2634	2033	1426	13161	5871	15210	9599	139643	239990	326023					1468407	452034	46633	46831	17516	59042	6778	9223	1143892	384005	79204	47386	8858	3028	7668	7704
466	2438	3135	3587	7188	1480	20442	60682	89804	201684	297705					221876	155243	95687	69574	6114	25434	8243	6617	562110	79911	48372	11656	6532	7167	3489	6161
467	1803	6057	4541	10599	10863	8690	11677	128069	204580	127800					1540963	37735	263066	32286	15665	5834	7647	12721	501352	32363	29821	5565	2158	3457	4471	14912
468	4295	1659	1458	5072	23910	1538	268961	66982	548275	75201					501285	267134	163396	48556	40631	6409	4795	2145	125958	14060	8741	12771	4260	4811	9382	8720
469	2474	6978	2360	3977	3121	9095	6470	108302	111255	982191					1298520	43789	173007	31022	22537	16765	3086	10521	928822	330538	56975	1352	7254	7476	9237	16393
470	3371	1935	1350	12584	1573	7231	106760	44214	111647	10990					184969	213066	201475	18000	2057	29287	16084	2191	140285	653731	33192	2195	4204	12813	9902	5405
471	2257	8229	1668	10930	1765	19875	5306	80559	272889	400080					1009772	197523	65753	52598	13577	22977	2940	2244	348666	234013	172739	8283	10000000	15050	4033	2660
472	2434	7989	6145	4120	7713	13209	63333	15514	65734	249561					1065287	272893	52162	46071	10124	6257	7395	1802	1349603	174970	13272	12331	13699	3756	6727	6987
473	2772	2700	1672	1406	13989	2264	6562	82679	229778	746643					976546	773969	16247	1763	12573	43377	7929	8534	880335	15616	83412	15659	2924	6639	10270	5687
474	1718	5223	5370	2177	16765	44676	5122	70578	104062	1586540					1078698	7865	114220	49879	2474	23237	9580	2807	36766	96498	31992	57395	4208	13482	7481	7300
475	1458	4185	4412	2350	1936	5151	28739	61378	30194	1904494					1320982	59638	137936	13177	12828	4333	4177	3164	340490	112094	55991	3957	3442	1998	6526	20494
476	3164	1980	3763	10455	10703	8023	11534	5451	227076	150265					2038234	97353	158054	5402	10300	2109	5503	9184	486504	80796	2407	14440	7527	14340	4552	3576
477	1948	1959	1676	3329	2757	30826	74297	160650	239764	366242					628379	265951	15501	4189	21255	3301	4940	2839	100353	240690	6461	7839	2530	1972	11528	9763
478	1441	1894	6674	9593	2346	18745	78503	7517	46569	12027					348590	197530	63994	34122	14020	2221	4252	9002	434776	187765	25735	50194	20061	7626	6675	4997
479	1413	1308	4734	5847	6546	18363	45433	126480	92232	203630					1762680	196951	103234	54403	6578	10256	25168	3630	92895	508768	4626	2486	4210	7095	2803	25072
480	5267	3846	1639	2050	15014	11090	6417	55955	564812	786408					1781064	76879	45806	17192	3445	1779	9615	7159	11855	103225	13358	9819	9997	3226	2517	9722
481	1734	2814	4954	3017	7005	50228	22613	174404	516811	477906					2240949	4977	80307	37484	37221	12787	2630	3349	333801	203890	49497	7835	17967	16579	5452	3474
482	5183	7763	3081	4951	5293	3261	72969	143650	306666	433585					428006	96231	150042	54524	3301	2058	2342	15659	182815	95067	127465	136247	18736	13639	4125	2566
483	2398	3042	4704	3779	3991	28017	4946	97772	24968	301578					923041	196695	56835	23607	6521	3894	5936	8610	162736	222681	24819	61796	7107	6104	2163	6574
484	2838	4489	9204	4488	15776	18695	39727	127806	221051	225910					918675	245923	171613	98034	3398	28391	16948	2100	972934	14826	90483	14367	5291	10069	3083	25212
485	3166	5071	4724	5377	6360	23315	102735	20358	38778	1946267					1846255	33899	100491	66421	4972	10843	8781	4918	96128	38380	202720	57655	9057	2369	17317	3562
486	1835	2030	1372	6073	36788	2347	7036	77372	92529	455002					211500	262149	9312	3334	12534	2344	2892	4399	584950	3577	18246	2025	7972	2201	4457	11937
487	3912	3500	2730	2277	6137	5625	14093	113612	433389	112975					1644170	239592	89508	34315	5059	15205	4002	6569	21742	185870	102252	139659	3514	3100	12206	4340
488	1448	2314	3583	16056	7683	81536	24221	17413	1368184	873358					173872	118852	56426	21753	2521	2599	9210	1423	502742	70504	41864	7791	3274	7360	3150	6186
489	3326	2093	7802	2666	11440	16841	48550	34860	72532	696884					1467032	816243	263167	18755	61809	19229	19905	6284	1336952	149589	36559	42404	13258	28271	2583	10243
490	1688	1810	1326	21254	4924	7224	83465	48292	214579	304184					3232531	3209	80350	31060	47963	9634	7210	6033	1309000	41002	54868	32923	5054	4158	3768	3908
491	3173	1652	2802	4947	2873	17130	28431	13003	1480751	570336					2178508	356823	68707	52634	7287	17512	6208	2153	279867	90413	14372	19310	2407	4581	8775	7609
492	2340	2453	2317	3966	7174	42242	40497	125021	65965	537581					333267	93592	247846	19717	7446	22353	3861	2065	29691	76637	3320	44820	13498	3525	14124	8619
493	1937	1993	1392	27809	6250	8574	58878	132606	267007	65114					547815	96613	46274	45005	13272	3572	6546	3104	78604	304389	2724	6028	4970	7150	8187	15344
494	4383	1404	5051	11120	14534	60475	25103	11474	42178	578218					471215	108970	91715	7042	10973	10731	15217	10303	220451	9363	20061	55996	6701	2272	5373	10029
495	3348	2389	7171	8014	6879	3058	43163	31938	152774	795707					255644	9511	13457	10393	23128	13008	8568	4307	102351	759960	8748	25680	10000000	2213	7052	2903
496	1907	5004	3818	5437	8712	38090	36093	47885	403166	1049654					428660	135513	124492	40050	26087	4420	3866	4989	101093	105757	3903	23808	4127	5237	9554	26744
497	1185	2114	3297	6165	2868	9919	22266	15790	492121	534084					382168	84348	410333	10012	60714	12401	18716	1962	250441	50916	5673	4196	19207	3447	13009	3419
498	1975	2002	5456	6513	10246	65611	9203	117538	64153	1503633					1522489	340074	2459	19488	27945	2638	1733	6432	226001	255326	51034	51325	10000000	3463	6950	4093
499	5915	1836	2738	9563	18807	4643	76861	16452	70007	269068					78808	66692	61445	170021	64671	9721	19303	3287	338311	37017	18600	9477	2560	11319	9686	10916
500	3373	4243	1767	7497	1671	8109	132624	77742	186439	188938					124996	169587	18452	60714	35902	5165	20589	9180	503360	68421	4821	22871	10000000	2362	6393	6876

## Sheet: Sheet 3
Fibrillogenicity Index Validation Experiement Tissue Characteristics
Tissue ID	Mean APD (ms)	R*C (ms)	Tissue Height (cells)	Tissue Width (cells)	Fibrillation Index* (ms^-2)	RC/APD Ratio	Reentrant Half-life** (s)	Reentrant Behavior Type***
1	66	9	82	53	0.0270981	0.136364	124.943	1
2	47	14	69	84	0.028786	0.297872	66.9701	4
3	98	10	91	52	0.0168831	0.102041	2.71954	1
4	46	12	77	54	0.0287504	0.26087	630.888	3
5	81	9	68	76	0.0246152	0.111111	51.1804	1
6	82	13	97	55	0.0164628	0.158537	3.07455	1
7	121	10	94	91	0.0191065	0.0826446	5.56136	1
8	70	13	78	91	0.0230769	0.185714	95.6054	2
9	51	14	81	86	0.0292105	0.27451	10934.3	4
10	40	14	79	57	0.0295628	0.35	354.918	5
11	84	12	60	83	0.0172744	0.142857	3.72655	1
12	66	9	65	76	0.0294911	0.136364	362.39	1
13	72	10	74	99	0.0294075	0.138889	631.163	1
14	53	15	62	82	0.0222048	0.283019	41.3575	4
15	94	9	92	90	0.026888	0.0957447	183.634	1
16	64	15	60	73	0.0171523	0.234375	332.428	3
17	65	12	61	72	0.0211683	0.184615	22.0675	1
18	39	16	59	91	0.0286806	0.410256	182.026	5
19	59	9	61	54	0.0269713	0.152542	69.7584	1
20	45	12	72	57	0.0294574	0.266667	745.867	3
21	70	9	66	59	0.0247238	0.128571	40.4627	1
22	81	16	96	70	0.015618	0.197531	58.6504	3
23	91	8	72	92	0.0277406	0.0879121	152.047	1
24	44	14	59	90	0.0289266	0.318182	NA	4
25	45	15	95	53	0.0252002	0.333333	24.8608	5
26	52	15	99	70	0.0262858	0.288462	47.7544	4
27	79	9	72	76	0.0260007	0.113924	95.128	1
28	68	11	56	71	0.0209272	0.161765	19.5213	1
29	72	10	63	83	0.0248716	0.138889	52.0245	1
30	76	14	70	81	0.0176455	0.184211	7.31709	2
31	64	11	80	65	0.0254702	0.171875	484.312	1
32	72	15	63	72	0.0155556	0.208333	41.4401	3
33	90	9	80	51	0.0192253	0.1	6.42556	1
34	147	10	86	99	0.0156536	0.0680272	2.78916	1
35	100	9	61	58	0.0165173	0.09	2.68383	1
36	56	9	56	55	0.0275275	0.160714	80.0263	1
37	44	15	65	69	0.0253562	0.340909	34.0346	5
38	61	13	66	60	0.0198162	0.213115	51.695	3
39	52	12	71	74	0.029034	0.230769	6006.51	3
40	127	9	75	67	0.01548	0.0708661	2.50375	1
41	54	15	54	98	0.0214912	0.277778	58.3377	4
42	71	13	63	96	0.0206055	0.183099	30.564	2
43	57	11	90	53	0.0266002	0.192982	5559.93	1
44	50	12	51	87	0.0267935	0.24	2409.81	2
45	97	11	96	63	0.0178246	0.113402	6.33243	1
46	97	9	87	71	0.0223911	0.0927835	23.1927	1
47	87	10	74	77	0.0216868	0.114943	17.6053	1
48	98	9	79	97	0.0246824	0.0918367	73.0277	1
49	72	9	62	71	0.0255384	0.125	63.5674	1
50	80	10	73	99	0.0262609	0.125	128.455	1
51	93	11	98	65	0.0191006	0.11828	10.4153	1
52	100	8	77	85	0.0252508	0.08	62.3022	1
53	53	15	76	83	0.0249515	0.283019	55.6314	4
54	62	16	62	77	0.0173112	0.258065	1043.48	3
55	98	12	74	85	0.0168196	0.122449	4.12983	1
56	76	12	81	83	0.0224747	0.157895	27.4094	1
57	54	11	84	59	0.0291728	0.203704	NA	1
58	52	15	70	56	0.019943	0.288462	27.4539	4
59	77	11	68	100	0.0238939	0.142857	70.9292	1
60	112	9	99	59	0.0183375	0.0803571	8.53937	1
61	35	14	52	52	0.0265306	0.4	41.2374	5
62	103	11	94	78	0.018812	0.106796	8.34259	1
63	105	10	96	94	0.0226165	0.0952381	21.0107	1
64	77	11	90	83	0.0254895	0.142857	142.567	1
65	56	9	55	60	0.0284679	0.160714	124.75	1
66	62	9	63	68	0.0293031	0.145161	263.042	1
67	47	16	67	73	0.0232285	0.340426	69.1535	5
68	83	16	84	99	0.0171094	0.192771	42.4999	2
69	64	13	57	58	0.0172763	0.203125	9.79047	2
70	148	8	86	93	0.0188689	0.0540541	5.48548	1
71	60	10	55	82	0.0274331	0.166667	325.274	1
72	91	11	83	69	0.01882	0.120879	8.41932	1
73	41	15	75	60	0.0271003	0.365854	24.957	5
74	132	8	89	71	0.0186997	0.0606061	5.18954	1
75	86	8	86	74	0.0289063	0.0930233	212.499	1
76	97	9	95	56	0.0201786	0.0927835	10.2469	1
77	92	13	95	79	0.0180318	0.141304	5.93955	1
78	61	14	67	61	0.0186942	0.229508	2196.31	3
79	60	13	85	69	0.0244131	0.216667	3316.58	3
80	64	12	60	79	0.022201	0.1875	43.9734	1
81	59	12	52	63	0.0201179	0.20339	19.4008	2
82	68	10	87	65	0.0273558	0.147059	215.102	1
83	58	14	75	81	0.0239793	0.241379	NA	4
84	73	10	74	63	0.0233077	0.136986	23.8677	1
85	62	13	95	91	0.0288328	0.209677	NA	2
86	127	9	80	99	0.0193551	0.0708661	10.2022	1
87	72	11	81	87	0.0264813	0.152778	394.225	1
88	57	13	93	67	0.0262778	0.22807	NA	3
89	73	14	90	79	0.0205827	0.191781	401.727	2
90	77	9	79	55	0.0233949	0.116883	32.5978	1
91	75	15	59	95	0.016176	0.2	27.1228	3
92	84	14	62	94	0.0158839	0.166667	3.2619	2
93	84	12	94	91	0.0229354	0.142857	45.6776	1
94	48	11	51	63	0.0266896	0.229167	3778.82	1
95	55	12	74	80	0.0291224	0.218182	28708.9	2
96	80	10	58	51	0.016961	0.125	2.41431	1
97	73	12	99	71	0.0235999	0.164384	47.3888	1
98	71	12	86	66	0.0219144	0.169014	21.8141	2
99	72	15	75	58	0.015142	0.208333	33.0474	3
100	58	14	74	59	0.0202137	0.241379	4623.01	4
					* Fibrillation index is calculated as Area/(Boundary Length * Resistance * Capacitance * APD)		**NA indicates that halflives could not be calculated because reentrant episodes exceeded computational limits	***Behavior Codes: 1 = Purely MWR, 2 = MWR + Rotors, 3 = Rotors + MWR, 4 = Rotors only, 5 = Non-physiologic)

## Sheet: Sheet 4
Fb Validation Experiement Episode Durations (Reported in ms)
	Tissue Number
Episode Number	1	2	3	4	5	6	7	8	9	10	11	12	13	14	15	16	17	18	19	20	21	22	23	24	25	26	27	28	29	30	31	32	33	34	35	36	37	38	39	40	41	42	43	44	45	46	47	48	49
1	24057	13173	1918	635882	38142	1972	5496	10000000	10000000	6236	2445	35160	1964	43893	262320	125226	10473	10000000	38366	100086	11205	10000000	2823	10000000	31778	42787	147948	8038	31024	8012	174443	11222	2172	3264	2960	62260	12673	10000000	10000000	1787	23836	4560	1913569	10000000	3264	15216	3348	6997	2752
2	14962	6752	2684	10000000	35239	1994	2595	27664	10000000	10000000	2314	212094	324408	16969	89745	75051	10000000	14503	24321	10000000	26065	10000000	47962	10000000	18416	37558	73554	8094	6653	4005	88502	31681	3924	1669	2978	38126	23831	10000000	90614	2154	101205	10000000	664385	4754742	3679	28120	2341	282079	59537
3	7601	10000000	2298	40461	12010	1876	5541	34048	10000000	10000000	3996	318359	149138	43875	47751	10000000	10000000	10000000	99791	126954	14383	10000000	100327	10000000	9417	69996	3763	18613	32987	10000000	481750	31230	1593	4097	1761	59076	17612	10152	10000000	1315	14481	10464	3276869	10000000	5983	6921	42980	42431	26691
4	13666	10000000	16744	10000000	29638	1943	2169	15245	872795	10000000	1649	46939	120508	19330	118283	74011	15978	10000000	7581	10000000	14595	9606	120780	10000000	23145	31216	89244	20189	116078	9549	125337	100048	4539	1827	2636	76588	13456	10000000	10000000	1353	52390	10000000	783085	10000000	1940	4967	14180	34355	119156
5	70912	10000000	2562	510026	22598	2715	17709	5336	10000000	7495	4879	276301	1541573	16698	51201	220476	4921	1476	7043	10000000	21316	13683	50499	10000000	30686	13160	18138	1763	39356	4137	188854	42049	8620	1836	1290	5485	13399	10000000	10000000	1251	21430	3778	585130	10000000	3382	6441	7458	34639	42986
6	23926	10000000	4962	10000000	80489	2611	2367	36052	10000000	10000000	4437	488801	71697	10000000	249581	10000000	5613	10000000	78612	10000000	7547	10000000	62957	10000000	23000	56016	11442	13198	9588	7551	328554	39173	2498	1849	4017	6406	20676	9811	333087	2464	41840	29791	1022490	10000000	19958	13663	1443	25777	27855
7	52233	10000000	3491	10000000	147778	9411	2117	70331	10000000	10000000	4636	139739	23854	15702	66326	308958	2133	10000000	8891	10000000	7239	188550	273064	10000000	39531	31903	58191	7197	5152	2352	26015	6020	3621	3240	2832	37084	30694	7226	10000000	2800	7545	5025	4735555	10000000	13450	8322	19311	24097	68042
8	17266	10000000	1572	10000000	2388	5709	2472	48475	10000000	10000000	2443	295952	28389	10000000	245385	174995	9900	10000000	12607	51978	27551	10000000	19806	10000000	26110	68249	68535	2043	29607	14749	189340	31569	1803	2323	2447	62002	10000000	10000000	10000000	2677	111258	10000000	2876413	10000000	5496	2693	5112	43379	43149
9	105616	15190	2003	10000000	35343	2116	12447	106122	10000000	10000000	1840	250530	21882	16496	121977	10000000	16647	15944	10358	10000000	13449	6309	11177	10000000	10000000	48691	13865	5100	5555	4162	36435	33996	4440	2321	1405	244442	16866	18392	10000000	3298	36817	14121	1055787	10000000	2776	2396	11875	32544	17961
10	65473	7975	1258	10000000	93381	2456	6281	29891	10000000	4839	4578	92442	143196	10677	597560	286383	3262	10000000	44806	37888	6142	11410	126768	10000000	15307	36376	35961	11256	5820	3630	245357	4417	6562	2866	1968	2175	31817	10000000	10000000	1617	49425	21231	2540858	10000000	4185	3195	16555	4468	35348
11	5398	9248	3857	246365	62446	2182	4773	10000000	10000000	10000000	1572	130979	683633	30542	46761	10000000	16951	10000000	38767	14331	2212	29864	57200	10000000	10311	46335	71021	32230	7769	5358	27591	21944	3729	2034	2254	51072	21283	10000000	99373	2160	41170	10000000	992360	10000000	1633	18856	5211	57317	60419
12	10953	8379132	2810	10000000	27500	3387	1738	7030	10000000	10000000	2083	14313	622601	51395	41076	10000000	31922	4080	217648	100850	25283	33238	54811	10000000	21696	22818	22062	12479	13260	7673	32595	10000000	22828	1519	1530	46638	33615	11173	10000000	1736	21599	10000000	3535807	10000000	1934	2724	21258	4848	78707
13	122725	17671	4127	54171	23274	7058	2103	3415	872795	10000000	3846	356635	754777	13818	90875	10000000	5593	10000000	91443	10000000	4509	10000000	59912	10000000	58256	96663	79215	29381	5260	9625	486846	54566	7248	1565	1463	64432	8548	2062	10000000	2275	59184	31175	151621	10000000	2973	8050	5764	7735	7851
14	11584	10000000	2590	58199	13944	2715	4766	10000000	10000000	12421	6561	299113	296400	26317	158404	225948	9248	10000000	7806	26190	31388	10000000	113927	10000000	10000000	46984	62830	17378	5387	5994	9014	15755	3273	2231	8096	62581	31606	10000000	10000000	2235	22445	9259	2230999	10000000	3147	27288	6752	4211	42763
15	26736	6541	1634	125296	7346	3999	1683	13805	10000000	10000000	4330	6314	5226	52011	19991	10000000	3127	39212	37658	10000000	13936	7788	96671	10000000	14760	39510	109831	4352	35614	7761	223697	77237	4150	1350	1403	128953	12029	40037	1340400	1921	55673	10000000	1944457	32491	2437	3873	48101	12317	36817
16	23807	14495	1439	448754	18302	1737	4046	10000000	10000000	10000000	3090	73085	159046	30896	192157	10000000	10000000	10000000	116731	48548	10128	10000000	119954	10000000	8640	12297	26002	21605	4094	2971	53490	25679	3095	1719	1851	1408	5569	9901	136046	1967	24898	6310	692904	250664	4180	7712	17995	8377	6220
17	7834	10000000	1504	62806	16747	2163	2358	16481	10000000	10000000	1384	55990	423690	26515	194378	46722	13910	10000000	4712	10000000	52973	20062	112989	10000000	19268	25670	59598	21199	58666	3259	113101	57122	2186	2439	1936	83642	28004	6423	131571	4158	55729	7583	4466449	10000000	1748	23646	7574	6275	4516
18	17884	10000000	1448	44952	45049	2549	7617	10000000	10000000	10000000	6518	54694	1010283	21785	102502	10000000	3133	10000000	11301	10000000	27066	2722083	15754	10000000	448201	61114	16596	32651	9546	7722	220692	10734	2843	2890	1728	11727	18845	19149	10000000	4217	29485	21339	3771572	10000000	2755	22466	8650	6104	42514
19	26759	10000000	1635	121220	19417	4250	4499	10000000	10000000	12685	2812	190131	529706	70165	9103	10000000	13247	10000000	50850	4094	2776	30177	11963	291271	65929	32851	5681	4012	41137	3597	399971	42868	3058	2120	2038	164487	60757	10626	10000000	4252	42584	4682	1915007	10000000	1634	10819	21445	56316	28044
20	50326	10000000	2547	126657	60294	3406	14933	10000000	10000000	10000000	2366	129155	260568	63196	20416	135224	48372	10000000	20701	10000000	5205	4694	108896	10000000	12774	31246	27017	9411	133087	10477	194366	29997	3504	2241	1688	256349	3413	30794	10000000	6510	21411	9985	3326455	10000000	10442	5413	13986	121211	47751
21	25593	10000000	1603	10000000	43906	2368	7357	76610	10000000	10000000	4780	21724	688366	11698	25431	235828	32101	10576	1581	10000000	6024	6439	16254	10000000	11149	16422	52808	22669	10796	1950	624174	10000000	4348	1884	1946	10508	16484	9206	10000000	1622	75578	10000000	10000000	109281	1950	7669	16078	18204	94852
22	205622	10000000	4188	410077	47172	6512	2349	13233	10000000	10000000	1532	32041	364691	43342	114785	223989	5458	10000000	36932	10000000	25327	16151	221811	10000000	5476	27074	126589	3432	64910	2209	39404	11476	8813	1459	2401	8567	17683	11998	10000000	5967	12193	10000000	693697	10000000	9914	4046	5226	9907	8841
23	23335	15262	1497	10000000	32530	2436	9361	13869	872795	10000000	1837	28028	643349	14135	199929	10000000	13587	10000000	35668	10000000	3932	19496	13006	8331	4559	16829	23570	10157	43515	10019	107727	8373	5156	6764	5374	12265	10000000	10000000	10000000	1303	18704	10000000	3445866	137518	5575	12311	15980	23929	9459
24	61653	36440	2681	10000000	65535	7697	1702	10000000	10000000	10000000	4830	444269	442603	10000000	109588	57459	24951	10125	2334	478410	1601	8652	15737	10000000	59224	10000000	31011	12877	10271	8055	406623	17459	2400	1699	4207	22532	10000000	48782	10000000	2267	75649	10000000	3379541	183426	4387	6195	41491	130449	13058
25	92809	18088	3226	14177	55875	2521	5826	32728	10000000	10000000	2195	24169	269391	66212	390819	10000000	33813	4646	37296	10000000	13808	10000000	125794	6727	9165	46731	79437	14589	8377	3221	372305	16130	2415	3206	1320	24098	6016	16429	276825	3285	18788	4394	2879099	10000000	4946	3108	2205	134710	2590
26	37736	12562	3599	11963	52212	2265	2821	110072	10000000	4933	1388	229732	133019	13960	117455	107393	16899	7190	89710	10000000	3830	10000000	75488	10000000	14650	59773	5396	5645	38268	8935	122055	6356	3469	1577	1762	37461	30210	32339	10000000	1779	54793	36773	1391470	10000000	4885	7237	31563	8891	37420
27	38549	13041	2813	10000000	83561	1790	8253	10000000	10000000	10000000	9704	270081	168114	10000000	61969	70457	4831	7656	9834	10000000	12147	5182992	137708	10000000	10000000	93851	33662	22333	38881	2247	919416	7594	2896	2945	2810	120622	15949	18688	10000000	2104	40083	11342	864543	54199	1428	24339	11182	68836	9103
28	2457	10000000	1942	320637	29548	3567	14073	10000000	10000000	8628	2406	286697	394776	29696	363180	10000000	5359	21087	37828	10000000	24572	29202	15857	10000000	10000000	17863	143183	12602	18657	3464	77334	13603	3156	1660	2855	66496	26702	10000000	10000000	1312	16112	10000000	4040603	10000000	3932	4115	14490	27976	43101
29	15615	22353	1275	10000000	61045	3089	6275	10000000	10000000	10000000	2030	17994	156399	51118	50467	360861	38097	25886	8643	10985	4079	14835	128481	10000000	35922	25318	87695	9853	31989	7443	384697	8868	3938	2205	6024	263923	10000000	47846	345178	3752	16258	15759	2648117	167252	2095	38639	59915	20764	18246
30	154894	10000000	5413	10000000	10253	2223	2762	10000000	10000000	10000000	1681	63269	385153	63254	134689	13358	11045	7707	22480	10000000	21514	5566	35165	10000000	30892	34962	41577	4721	3482	4355	29339	21321	3124	2898	1898	2483	16636	10000000	10000000	1520	31899	6772	1599216	10000000	3990	16643	1456	2255	8691
31	8280	10000000	5195	10000000	2111	6565	2820	18581	71424	10000000	2233	255762	297276	12972	73190	21994	6087	9865	56556	10000000	7168	10000000	218530	10000000	19902	41127	28173	2347	19441	10428	577391	12902	2136	2789	1135	85009	14354	10000000	10000000	2289	24189	9233	619642	10000000	7471	1859	17671	46388	16037
32	16160	11719	4151	10000000	14856	3101	1764	17723	57223	10000000	4476	60065	82810	16604	7976	10000000	16600	10000000	52547	10000000	25163	2595933	169104	10000000	21926	15274	107866	5276	7963	7545	272284	20070	3389	3330	2388	107122	10000000	14960	10000000	4872	26154	8212	2424993	10000000	4543	9621	11393	20799	55468
33	113150	10000000	1886	19337	10269	3303	2241	57482	156199	6096	4672	81231	101301	31227	65849	35899	21606	10000000	3020	10000000	30069	4663424	11278	14594	10000000	20850	69176	1454	4653	1824	446135	22802	3710	3228	1486	4675	10000000	12224	186331	2001	48210	2974	1453065	74496	3094	3320	1455	38585	21461
34	137519	29936	1650	10000000	14443	2619	1517	23015	10000000	10000000	4146	108255	598051	24159	80975	10000000	13054	10000000	27381	9472	21765	10000000	265332	10000000	10000000	17101	146842	2117	133891	7586	45466	4251	15623	2192	2063	2088	10340	12370	322069	1548	18211	21876	5763665	167426	2837	11550	16653	27896	33812
35	103552	22745	3482	10000000	38598	2395	2341	10000000	10000000	10000000	5230	304653	42839	20337	61370	10000000	17492	1324	6728	10000000	23056	7536	268992	10000000	46597	49985	24304	3667	49652	2433	49332	18799	1458	2178	1325	6967	44124	10000000	219514	1377	21930	9116	189001	104598	2245	35737	20413	36464	33773
36	20018	10000000	1922	57918	10047	3851	3188	14747	10000000	10000000	2729	365062	149264	25531	253881	396687	8951	14260	223355	28723	2769	3196	29988	10000000	33820	76448	20272	12958	34204	12149	352836	6981	7232	4090	1710	22928	7919	10000000	10000000	1933	49874	10000000	2033768	10000000	11481	17005	8210	37104	31914
37	13265	10000000	4899	120845	36379	3685	2092	38781	10000000	10000000	1836	253768	317928	10000000	16669	86732	6472	1437	2555	10000000	69957	11386	70942	10000000	7230	45589	29299	14341	101359	5554	24152	11042	6134	2050	5122	5395	20472	9068	10000000	3778	28433	3967	1039701	10000000	2376	4365	3644	12673	77531
38	13536	54594	1806	10000000	15374	1820	1900	22743	10000000	10000000	5082	149156	935078	42228	148641	10000000	16198	17550	245852	38386	53566	28109	27255	10000000	14385	44723	6880	9006	14039	7895	99018	25479	1800	3616	6655	13241	39998	12324	10000000	1313	6656	22033	6754077	284148	2291	17762	11035	111574	2270
39	47989	10000000	2065	10000000	46543	3501	13656	130526	872795	10000000	6237	218182	67732	67603	25290	168256	22332	10000000	119247	10000000	15685	25283	60519	10000000	4706	25017	97520	2093	23298	19243	503132	14509	4293	5702	5568	58450	31391	11713	10000000	1243	39476	8334	254678	10000000	3870	39292	6126	30446	51859
40	13799	5236	2412	140105	72027	2532	1665	19779	10000000	10000000	2090	53605	97678	38837	90302	10000000	5425	10000000	3120	10000000	64450	38848	20493	10000000	8158	30879	97211	12783	32107	8143	980288	6230	1188	1460	1598	58604	14988	8589	10000000	2648	24515	21266	57121	10000000	3848	9371	13067	3095	75868
41	71019	10000000	2842	10000000	24572	2672	10072	10000000	10000000	10000000	2424	400822	887067	12330	141422	49752	9937	10000000	5881	75988	2576	10000000	118120	10000000	5899	24408	43311	5953	6393	2477	36332	14130	7352	2894	2639	74604	7999	6280	1283358	6122	57252	7606	2514128	10000000	19015	17287	45283	71731	103722
42	21408	10000000	4595	10000000	2538	3730	3474	6049	10000000	10000000	6355	19021	747118	54709	142542	273540	6464	10000000	66656	10000000	39072	16175	14918	10000000	11398	18525	51504	2797	47721	9943	37499	48276	8471	4469	1583	52718	19228	25997	10000000	1333	64497	4072	1001006	10000000	1839	17884	15601	8958	39713
43	37675	10000000	2366	170053	18209	5249	4990	55161	10000000	10000000	8385	565748	412418	64228	48639	10000000	25144	10000000	31752	10000000	8243	10000000	84061	10000000	10000000	10000000	52997	1755	5954	5246	601976	24497	11802	3001	2677	7983	22859	11524	74010	4023	65097	11565	3599859	10000000	1714	13652	1644	35100	54097
44	2923	33455	5241	1076498	158389	6164	2074	8795	10000000	10000000	4915	21918	529746	85430	62055	77704	9982	10000000	9800	10000000	26802	3936	48514	10000000	53810	38975	38028	5545	21432	2914	765510	52808	1846	6737	1140	14212	18629	39321	10000000	6694	18235	10000000	4142073	10000000	3728	1698	3685	10260	100053
45	257907	885770	1702	5846	40609	5037	1585	10000000	10000000	10000000	1744	33086	96064	61191	177042	38939	8196	10000000	40299	10000000	47691	10000000	170249	10000000	42928	52743	16036	19946	4115	5785	124181	14236	3419	2159	2705	55860	10000000	10000000	24754	2120	19716	32367	3624608	4676210	4564	9397	6215	22568	18215
46	15935	7961	1749	70074	9137	2019	14168	36671	10000000	10000000	8070	71478	44662	43125	74548	25595	38182	10000000	12550	10000000	19989	18238	24831	10000000	24507	20467	72134	10547	11311	2628	248264	62336	7686	4731	1556	40733	59275	10000000	10000000	1174	39429	14533	2702237	10000000	4281	26735	11759	18890	14923
47	150703	11889	3490	135070	64540	2461	5494	17729	71424	10000000	2850	245087	506204	25491	11938	32377	3064	10000000	15220	10000000	86351	4864	85988	10000000	6682	32539	42272	15335	54379	5364	474812	12298	5810	2056	1713	17867	47038	10000000	10000000	1602	49736	10000000	4041458	10000000	1770	7586	3199	107252	9659
48	33358	10588	11809	147158	8921	3279	2137	10000000	57223	10000000	4304	124096	176714	19202	55339	144434	2874	10000000	16847	10000000	30996	10000000	122083	10000000	31555	47730	155359	14046	27622	9031	530740	13680	2010	5876	1688	13918	10000000	5984	10000000	2439	21943	10000000	3625570	10000000	14167	7526	8459	12712	58845
49	51000	10000000	3318	10000000	4403	1691	4978	64172	156199	10000000	3451	31735	533465	20466	21668	140178	22868	16519	8416	10000000	103547	10000000	138788	10000000	14975	25871	68329	8977	70162	7258	492274	50902	4893	1374	4458	17247	12213	10000000	10000000	4278	92926	10000000	911370	10000000	2691	5193	5823	2132	54106
50	41541	10000000	3532	10000000	48597	2408	4266	29964	10000000	123678	3083	284120	998214	34019	20859	48541	10000000	10698	14580	49472	13913	10000000	146879	10000000	23024	38143	102826	19000	84553	6068	292424	52390	3870	2129	2068	35068	24754	40649	2198479	1679	16654	10000000	2498862	10000000	7981	4560	11511	11758	2172
51	51802	30396	2167	10000000	16433	2833	4197	10000000	10000000	10000000	3693	419386	171966	51493	4520	14144	24840	10000000	1458	10000000	39659	10000000	183208	10000000	9978	24997	3759	2022	56602	3299	791047	22675	5952	2168	2034	12276	18085	10000000	10000000	1308	13513	10000000	1970512	178995	7279	11973	4519	55582	57281
52	180267	53868	1965	29025	79052	2597	2290	7210	10000000	10000000	4646	615122	1107871	22679	184423	70610	11367	12206	32514	10000000	17236	24792	3520	10000000	12163	28141	9885	22325	21495	4336	153516	15429	8195	7598	2367	5226	8438	12226	809748	2175	17845	10000000	8151093	10000000	3437	26153	5057	72954	45044
53	16845	10000000	3101	56293	97782	1985	4356	9712	872795	10000000	2728	10973	732642	18454	90640	34946	7985	10000000	16386	10000000	18252	15383	167354	10000000	11551	37541	54750	3234	224014	14023	35916	22299	3115	2052	2065	21001	11271	15624	349555	1334	48839	10720	1281842	17368	4048	10139	5337	154705	16957
54	152456	10000000	2226	10000000	5358	2390	3044	42537	10000000	10000000	2614	178176	721993	37679	174175	10000000	6176	10000000	35452	10000000	2327	26573	33540	10000000	6252	46609	63236	6309	30366	5618	61929	34076	3272	1346	2868	50583	9253	10000000	10000000	5585	10000000	10000000	1473531	10000000	8765	27646	12043	22028	105559
55	173047	14168	2699	256203	39606	2711	2162	6580	10000000	10000000	6265	169842	850104	21909	245779	10000000	2626	7724	67090	10000000	48778	10000000	6686	10000000	10000000	29361	2544	2576	28747	4495	36540	24230	1717	5830	3204	118423	28781	10888	10000000	1305	34487	12026	535161	10000000	3481	9170	2848	16314	42391
56	56381	10000000	2276	94018	98050	3322	4563	9866	10000000	10000000	4289	412947	196677	12768	55355	334812	20067	10000000	8806	10000000	52158	69017	77162	10000000	36002	46308	128975	21549	84946	16871	580348	43560	4650	4960	6150	117197	8081	18140	602271	3245	33253	7920	647209	10000000	2123	23428	2801	3758	4015
57	32268	19039	1233	8231	35202	2932	2069	10000000	10000000	10000000	3318	63921	52982	10300	245142	67883	17783	10000000	6712	10000000	14498	157349	32913	10000000	13147	48963	11979	13314	23290	3175	510303	8699	10761	1468	1309	21609	27114	12566	1231516	1447	66073	3811	3353865	10000000	2517	15356	8803	7369	20949
58	88941	10000000	3943	10000000	65195	2589	5539	101091	10000000	38819	2470	302287	1175837	10882	290317	280675	23691	10000000	58477	10000000	4046	2630	39202	10000000	37238	34243	45690	6105	59729	2844	30160	10829	1369	3784	1591	116816	7561	10000000	10000000	6660	35423	10000000	545540	10000000	3402	6214	3799	68435	25518
59	58879	10186	2046	10000000	45364	2195	4771	35401	10000000	10000000	10172	332616	41902	38456	123178	10000000	11025	10000000	54311	25340	2303	10000000	391243	10000000	13912	74148	33325	46774	21204	5967	88033	16211	1929	6034	1399	221146	11163	6718	33252	1230	41424	11908	1913569	10000000	2105	2785	34103	8451	68602
60	30039	13058	1989	10000000	111872	3375	2171	10000000	10000000	10000000	2053	361138	691155	29469	6493	10000000	6619	17684	22884	10000000	16803	10000000	11684	10000000	12704	39120	28975	2117	42187	3679	148860	10178	1535	1577	2422	66994	25575	15498	10000000	1281	65855	10000000	664385	10000000	10846	6654	2200	62551	80650
61	46644	17138	3027	147647	19857	2665	4580	4195	71424	10000000	4413	156055	567251	46201	232164	20368	9141	10000000	44347	148081	1566	10000000	2204	10000000	4967	73197	152437	23690	11698	3734	111968	10000000	3345	4035	3155	77065	59836	7209	10000000	1922	22533	5271	3276869	142702	5845	5639	1907	87852	46966
62	72070	11798	1698	10000000	6392	2287	3781	83579	57223	6656	2676	326356	374851	28220	62794	10000000	12159	7951	9514	10000000	51708	8791	50232	10000000	7990	12327	19499	2801	19322	2778	31292	10108	3603	1715	4005	61135	36646	23297	1055180	1324	83097	28622	783085	10000000	2784	22750	4657	31442	17618
63	70367	10000000	5680	10000000	8981	2810	4252	10000000	156199	10000000	2771	207768	625676	62884	13242	10000000	21922	10000000	24211	10000000	8398	11203	8215	10000000	10000000	15557	38616	23904	57657	5760	560104	22134	3702	2043	1709	36958	11941	75466	10000000	1974	40916	11560	585130	10000000	2618	22778	4166	87370	4434
64	98595	17954	1445	6486	6035	1782	3370	79107	10000000	10000000	1694	21855	905907	9576	51842	66352	20044	10000000	93680	51122	106900	10000000	2648	10000000	25530	52387	40572	29067	24176	22538	111376	21433	6938	3855	2382	4626	75210	10000000	1176348	1266	37168	10000000	1022490	10000000	2775	12628	2254	35460	48818
65	49719	10000000	2499	10000000	7984	3208	5776	71430		10000000	2776	236068	51419	10000000	124812	54196	3860	10000000	65770	68058	16854	13346	8655	10000000	9508	10000000	9546	9716	55373	2305	417880	17597	3349	1301	1265	100064	8907	13875	10000000	1401	45435	13339	4735555	66681	4892	11390	15506	50953	25167
66	14487	20189	2470	10000000	63061	3996	8209	12685		10000000	1490	806374	17268	24168	83945	208879	37588	14030	91206	10000000	20509	8420	91528	10000000	13597	14718	67874	2101	29351	2240	17609	9096	4682	2853	2085	18409	30929	13973	233702	2770	66523	2900	2876413	166043	2165	21463	7848	29015	21516
67	41500	13959	2214	10000000	17540	1821	7240	17692		10000000	2058	24068	136691	15199	70808	48357	3319	16333	46434	5928019	34766	6952	92865	10000000	13634	25314	25480	10261	34124	9346	226677	10000000	4620	1603	4041	323443	7740	92618	10000000	3180	37373	10000000	1055787	10000000	5293	37367	17160	51277	43208
68	48305	10000000	1526	10000000	12538	4190	2291	10000000		10000000	3188	242180	259472	15030	155972	642181	14187	6109	23897	10000000	17858	23538	11139	10000000	9906	26644	2660	17826	52952	5524	160474	82994	16055	2183	1161	57013	10000000	15683	10000000	1592	20113	39299	2540858	10000000	7975	9319	50527	23169	15992
69	49026	10000000	1569	324073	11566	3536	4546	7023		10000000	3686	94954	326828	75854	45057	129923	11577	6342	11563	10000000	7641	123344	181497	8176	201313	16330	44459	14776	108540	9402	31020	14114	3323	1964	2525	20730	19116	68747	509912	2936	10000000	7209	992360	4970771	3238	13834	2780	3266	100776
70	16328	15209	3267	111971	40485	1697	1675	52809		5756	5124	24195	816720	15814	229692	212295	44831	10644	1900	10000000	31449	10318	57993	10000000	13788	35872	152392	3475	16800	8476	19428	5962	4026	1521	3334	52351	32659	5501	10000000	3455	23928	10000000	3535807	10000000	10721	5215	1816	38677	68511
71	7212	10000000	3171	10000000	6612	3050	2266	55411		10000000	2019	16733	485362	31554	60556	103807	10536	18312	35553	34079	9035	9239	48603	10000000	8005	58646	121876	50122	10628	10483	388798	59390	5667	1841	3815	44967	18502	40448	10000000	3603	27947	10000000	151621	10000000	2945	25270	7751	66318	8249
72	24308	10000000	1444	34494	48876	2717	9934	10000000		10000000	4088	12440	98586	26581	303906	130491	9929	10000000	16118	10000000	42024	9721	29181	10000000	16691	41290	65114	2830	12378	13569	458655	49436	6795	5640	1645	8675	12560	23468	662914	3108	81673	10000000	2230999	625710	2760	35082	5991	54935	8643
73	38325	8925	2606	10000000	22431	2390	1721	10000000		3976	6504	30561	1006857	23072	172791	65896	2676	10000000	17565	10000000	31906	1617624	18255	10000000	9279	14215	1954	12215	2322	10211	149732	36075	4608	1482	2368	36758	5403	13982	10000000	2513	34744	10000000	1944457	10000000	1743	2327	25419	4649	14311
74	9712	15747	5242	197393	22288	3047	6745	65412		4223	1635	51667	202151	14587	170436	10000000	42626	10000000	14333	10000000	43096	14058	80428	10000000	19359	32519	67703	28330	15077	3539	348271	56494	6720	2659	3028	32625	7623	112341	10000000	1275	45944	5618	692904	10000000	4029	1568	12367	9831	12344
75	116738	10000000	1663	64759	11380	1511	1871	10000000		10000000	3438	193619	160926	10000000	70355	69313	9195	10000000	16248	10000000	8432	12893	3466	10000000	14869	10000000	50653	15348	41229	6772	128678	10000000	7795	5778	3022	64233	14820	10668	10000000	2912	12593	17365	4466449	10000000	3086	10695	10335	23501	145867
76	19053	10000000	2404	10000000	27109	5191	4697	10000000		10000000	2863	98578	102333	9008	45449	10000000	10000000	9288	25128	10000000	44490	10000000	15872	10000000	19159	23157	11300	16264	28132	1808	1274938	16437	1320	2055	2496	48428	5021	44847	10000000	1315	12869	12255	3771572	10000000	13931	37661	3016	10416	26194
77	138416	12054	1847	10000000	19326	5000	10384	18953		10000000	4940	15916	311583	28352	207133	68284	2772	10000000	33345	68792	2465	6835	17349	10000000	34213	16862	111639	20900	2080	4246	162472	8181	4475	1452	6336	17820	157600	19505	2282344	1397	46881	6352	1915007	10000000	2848	7258	2949	49366	13574
78	126635	10000000	2447	39745	11699	7051	6922	59304		10000000	5730	82900	316475	9859	118351	528449	5149	10000000	15068	10000000	17286	17723	129302	10000000	10004	22200	9110	15345	33411	12051	1120015	9637	9757	2421	1544	233736	10000000	10000000	10000000	3374	36997	25194	3326455	10000000	1982	12272	3179	2361	73763
79	130249	27809	3246	10000000	33023	5002	6130	24636		10000000	2268	364602	144112	25655	115138	21503	6175	20391	269020	10000000	15582	11456	9100	10000000	12208	30064	45204	6901	27620	2415	225621	19649	1998	4727	2697	60198	20214	9669	10000000	2103	16591	3298	10000000	167481	2967	3735	2846	15456	7358
80	16230	10000000	2061	53443	12958	2683	3455	19041		10000000	4389	2176	471242	10097	42386	10000000	7432	7870	89836	10000000	1481	6993	38169	10000000	11323	168447	50463	1833	68528	10000000	838175	43035	2027	3511	3069	38130	8423	9755	10000000	1373	13130	3794	693697	10000000	4728	15840	12821	63925	54950
81	10894	10000000	5903	186215	15825	4287	2557	39587		10000000	2637	228452	1142352	29504	115781	10000000	3618	13054	53145	10000000	9604	10000000	71704	10000000	126097	23682	16827	6106	5113	10193	106184	65514	8953	3418	1411	143797	28189	10000000	10000000	1895	21618	10000000	3445866	34455	1755	12691	34716	23342	42695
82	4833	11179	2182	10000000	11022	3273	7871	3876		10000000	1691	260450	227154	51024	57273	10000000	6460	10000000	3922	10000000	8629	44109	8200	10000000	7359	21382	78549	9696	126990	29289	679815	11908	6278	3506	1608	59181	16079	10000000	10000000	1369	32355	7408	3379541	10000000	11228	17783	10485	6700	15382
83	46491	20228	1696	10000000	60417	7514	2655	10000000		10000000	3204	10216	822814	23748	8017	73878	10000000	10000000	120681	8654665	29635	6879	107619	10000000	13709	14355	91118	7074	15749	9179	198729	18337	1663	1571	2798	235222	20277	10000000	243126	3072	128135	10000000	2879099	330458	7587	1309	14093	81864	9721
84	7712	10000000	3327	15148	31813	9965	2320	49028		16861	5691	543933	402562	32927	124427	10000000	10000000	5595	19833	75521	45487	10000000	254290	10000000	7249	23083	18406	16977	19947	11790	117833	11580	2149	2354	2352	11821	16662	45586	228977	4698	27373	9199	1391470	10000000	2331	11558	6856	95219	13751
85	207630	10000000	2312	8626	6583	2439	6987	10000000		10000000	2382	80763	273296	71124	373057	140866	19046	10000000	64940	10000000	88280	10000000	61894	10000000	24512	67093	24583	43244	130806	3512	561461	3733	4063	2637	1238	58090	59857	43913	10000000	5276	35535	10000000	864543	142702	12026	1328	8465	50166	3403
86	81371	10000000	2246	10000000	66357	2632	3706	33169		10000000	2158	477263	634058	10749	23891	127133	4404	10000000	39859	10000000	1583	23135	15521	10000000	17948	42676	77756	2742	44571	17475	489213	38915	1610	6536	2878	144501	23743	37895	3923010	3230	31451	57245	4040603	10000000	3417	3538	4122	188337	4284
87	21259	10000000	1783	19554	25363	2230	2570	10000000		10000000	2880	52572	125084	58276	176071	215536	26348	9677	11037	10000000	8206	41219	150220	10000000	9494	26252	61818	7011	2782	3351	1057167	24951	6261	5054	1250	18206	38404	62773	10000000	4875	13724	9431	2648117	10000000	4123	21193	13466	18119	26667
88	5815	10000000	6430	10000000	93806	1757	3084	9752		10000000	3881	143195	761609	35866	309407	278966	10000000	8475	90113	10000000	24785	23612	27498	10000000	21402	13879	135994	4587	22788	8139	92745	22709	3684	1967	1899	20389	24701	24020	10000000	3369	13879	3231	1599216	10000000	12579	21102	8572	10501	15563
89	107888	17049	1490	10000000	68517	4910	10395	65029		10000000	3185	143285	317324	38127	10235	56131	2368	1559	25652	9370093	22957	7686	4786	10000000	13260	18119	42049	12998	27123	6880	228214	10000000	2785	1965	1814	60703	9944	10000000	10000000	6566	30121	10000000	619642	66681	5472	16504	2611	17303	2863
90	1908	10000000	4205	10000000	8178	4244	7906	10000000		10000000	4232	96682	25691	21926	448800	60951	29104	16455	17167	46752	9278	12185	323216	8464	10965	36900	57373	30665	57806	2442	299288	11351	3752	1730	2330	42338	8241	10000000	10000000	6143	25707	4830	2424993	166043	13408	17098	12444	40829	6172
91	70108	12514	3538	442916	16264	2806	2488	10000000		10000000	5064	349998	197873	11799	121744	8610	12882	10000000	41824	26890	14576	10000000	28402	8176	16408	45437	48426	17492	7766	3411	88123	17288	7745	2550	2615	28115	16282	10000000	7329517	2543	17926	13423	1453065	10000000	3587	55610	10032	61126	12701
92	18699	10000000	2543	417398	15749	2379	3962	111780		10000000	4273	51972	609036	29993	158127	10000000	7377	10000000	26601	10000000	22606	158276	2119	10000000	29868	34520	27442	3238	28190	6120	62769	29288	2038	1351	2829	67476	35204	10000000	10000000	3692	16954	17739	5763665	10000000	8610	8604	4153	21274	9396
93	93988	10000000	1249	10000000	57588	1850	3848	21883		10000000	4492	186295	422605	31830	241263	39354	35120	10000000	4019	86999	23609	7547	91447	10000000	17597	29331	51821	15856	45528	3734	335328	19141	4336	2996	1231	20251	37013	10000000	10000000	1805	15205	2892	189001	4970771	12390	21912	12577	19227	57087
94	8855	5891	2301	130594	90309	3348	1951	11625		10000000	2087	164108	231335	8891	55657	475637	6375	10000000	134029	10000000	107593	31699	121969	10000000	10000000	19647	67747	13610	77192	9756	227081	28671	4704	4168	6965	119712	17541	3749	10000000	4750	34066	10000000	2033768	10000000	3828	18629	1599	68577	65286
95	123543	6656	1616	10000000	5198	2942	2885	17648		10000000	1978	100312	203079	25281	145809	70610	22451	10000000	11554	57112	12276	12763	4092	10000000	23165	33289	90010	3044	4514	3533	43106	23313	1531	4158	1244	53395	16910	10942	520505	1775	77551	18391	1039701	10000000	8446	4500	2534	15068	74097
96	105008	16133	2782	10000000	79788	1888	2100	51156		10000000	2100	270569	170977	17608	153283	74780	31193	12072	13168	10000000	23653	10000000	17895	10000000	10057	53062	90142	22733	10510	6481	774316	8558	2269	2307	3234	33398	14392	6976	1262107	2317	31013	10000000	6754077	625710	2294	6436	8042	63026	2087
97	117724	12964	3810	10000000	42036	2322	1965	9947		10000000	2694	405078	238131	9397	68188	60011	2012	12542	90944	10000000	26060	10000000	189247	10000000	8010	29880	30094	21106	32042	2908	25460	28260	1647	3766	2390	24139	12099	6577	10000000	1687	71517	10000000	254678	10000000	5140	10420	12643	131718	17038
98	93201	10000000	1932	210471	3494	2781	4162	24900		10000000	4727	29785	81980	17196	10981	10000000	11768	8025	21353	4766	57092	131055	33341	10000000	15731	23145	2276	9578	17355	2161	154930	90156	5204	5681	2759	14570	8047	10000000	7784906	1544	54504	3039	57121	10000000	17061	2659	3605	43558	20478
99	44358	10000000	3818	196057	39700	3897	7451	66360		10000000	5014	65906	391102	33611	56548	356366	29807	10000000	2314	565976	92555	13013	94375	10000000	11324	34349	12034	28409	33659	3957	729347	10000000	1269	3930	1222	27695	10470	54565	501865	1388	21169	10000000	2514128	10000000	2862	24803	1800	22415	13839
100	69850	9793	1537	10000000	6546	2344	1776	31854		10000000	5150	125845	8843	12197	124820	155045	4169	9920	28911	10000000	47996	10000000	15969	10000000	33029	13476	48099	8322	5065	2821	126986	42986	5485	1720	6230	2999	11131	10000000	10000000	1315	10000000	15267	1001006	10000000	2721	40254	7592	20668	26199
101	69086	6313	3750	10000000	38142	2437	5496	10000000		10000000	8508	192869	1028790	28472	5831	194110	8788	10000000	121840	10000000	47248	5926	35787	10000000	39560	42787	54585	8330	25386	7714	145641	5775	1363	2025	2945	170235	10458	6640	1232133	2586	27283	14002	3599859	10000000	4438	19182	3348	10502	8908
102	40624	51116	6429	10000000	35239	2240	2595	10000000		10000000	1835	25145	10785	27260	69652	23333	31119	10000000	154430	10000000	1436	52782	9015	10000000	6892	37558	52217	19762	5612	12385	213333	11629	2755	2888	3053	14344	29505	37169	10000000	3409	15234	10000000	4142073	10000000	1480	8010	2341	63204	66718
103	23877	8989	1526	10000000	12010	1887	5541	109821		10000000	1721	18656	320043	17166	326801	196381	13466	10244	29349	10000000	46614	10000000	42645	10000000	35494	69996	22983	11803	5450	10000000	14556	11160	6531	1708	1320	48868	10000000	10000000	10000000	3020	24538	10000000	3624608	167481	2216	15942	42980	55776	24705
104	62925	19271	3713	10000000	29638	1633	2169	2928		10000000	2174	259672	289795	29478	46434	79550	4642	47159	1309	10000000	15203	13232	234839	10000000	12070	31216	7249	7387	54734	2243	55990	37552	12366	1999	1990	27058	30974	31525	10000000	2217	41664	11964	2702237	10000000	10413	12115	14180	9076	6366
105	142841	11833	2023	26685	22598	2267	17709	10000000		10859	2724	161729	313862	20566	55230	70827	3702	10000000	23458	10000000	10772	31087	287292	10000000	28792	13160	144201	8280	43873	4458	238842	254287	1626	1394	1290	8850	10447	10000000		1275	17910	13909	4041458	34455	12191	28764	7458	6846	9210
106	102303	15345	3867	10000000	80489	2696	2367	64136		10000000	2305	251147	47758	64916	34457	33164	10000000	20483	18526	10000000	2592	10000000	334786	10000000	26408	56016	39907	2135	28570	3299	1119506	21039	11665	2318	1838	1739	8026	10000000		2617	24934	9933	3625570		5180	51000	1443	4943	35104
107	55805	24879	1431	100222	147778	3233	2117	28024		10000000	3468	96009	825809	25130	21123	129262	20569	8464	17966	10000000	93420	32830	33413	10000000	26270	31903	5811	11915	7457	3254	192296	13795	16011	1881	1705	6979	9736	13350		2325	33111	19504	911370		3106	6749	19311	3936	2697
108	134656	10530	2080	10000000	2388	4325	2472	8217		10000000	2987	1190830	296368	43393	43945	242020	19062	8985	10250	10000000	3041	23690	137419	10000000	6016	68249	18101	72726	8595	3570	34903	5782	1202	3191	1243	88985	15278	5071		1634	16124	3988	2498862		2129	4564	5112	103932	20550
109	87013	9864	2463	52291	35343	4053	12447	33899		10000000	5295	24000	2096293	16917	1941	745753	4151	10000000	51169	20292	13916	10000000	22581	10000000	6018	48691	95244	19867	37073	986532	631357	5728	2613	2962	1817	7504	74600	41653		1722	24955	25138	1970512		4367	58580	11875	68871	57797
110	61354	10000000	2299	10000000	93381	2418	6281	10000000		10000000	2472	300676	309695	31457	50133	123872	18787	10000000	73764	10000000	7877	10000000	217977	10000000	10000000	36376	1699	5201	16961	4776	445018	3200	5677	2081	2038	37387	25752	13297		1266	22305	12782	8151093		9901	11889	16555	32795	4338
111	6688	12918	1366	28588	62446	1992	4773	10000000		9733	1741	352303	344594	34149	159823	24152	14462	10000000	10316	10000000	113163	434457	44787	10000000	21011	46335	9876	2074	16870	8913	104675	17902	8460	2336	1510	27630	10000000	21201		2248	45905	3862	1281842		2308	30820	5211	14982	49388
112	86361	29063	2030	10000000	27500	2511	1738	10000000		10000000	2161	47033	389600	81843	28914	10000000	5260	2894	31617	42411	23565	41554	1516	8464	16172	22818	102004	9000	16018	3528	44899	42367	5240	2079	1128	108517	9246	12284		1207	16799	3930	1473531		11701	14455	21258	165043	8386
113	2062	10000000	3629	10000000	23274	5113	2103	4053		5545	3943	50225	110551	35450	100192	10000000	4189	10000000	2295	5349	153644	89190	19647		77766	96663	47145	10000000	3068	10000000	330731	6050	2996	6235	1201	45999	11190	10000000		1405	36647	13922	535161			5827	5764	2826	13538
114	58677	17681	3371	10000000	13944	8968	4766	10000000		10000000	2932	873505	895462	25089	3902	10000000	6330	10000000	63923	10000000	7144	10000000	149400		26270	46984	3758	21124	12374	5773	718618	57635	3720	1694	2624	3816	8256	10000000		3142	17098	3694	647209			4038	6752	16204	34031
115	3135	10000000	3217	57441	7346	2225	1683	13026		3168	2121	184938	598971	25688	146163	24401	7249	2437	171867		3568	162307	25491		24564	39510	71222	13953	39644	5665	99369	45016	3006	1432	1513	169388	18245	10000000		1319	20646	10000000	3353865			13553	48101	88178	100539
116	142393	14836	1450	545475	18302	1668	4046	54659			5800	384315	768518	18453	199447	164706	22261	10000000	11071		13199	20810	1704		59798	12297	32420	13376	8018	6704	149982	10575	7711	1852	1577	25177	60802	10000000		2636	25538	10000000	545540			11830	17995	12389	124451
117	115079	15608	5008	10000000	16747	5046	2358	8092			2312	129775	17063	11729	174149	10000000	2500	10000000	30033		22166	14677	8408		23512	25670	32911	1507	31866	5019	179662	10000000	2343	3188	2233	4547	10000000	55788		5280	24581	10000000	185255			9431	7574	8654	75526
118	10546	10000000	3862	10000000	45049	1965	7617	47654			2964	485162	85155	10795	75428	10000000	11859	12672	11147		22646	6624	69322		27057	61114	56707	5069	4104	4402	89325	12096	2199	3393	1311	54600	32432	10000000		4106	46144	10000000	9234441			19773	8650	53947	74685
119	163785	19620	1808	10000000	19417	3019	4499	27273			2308	9400	259548	10000000	21265	151240	10000000	10000000	6719		24694	7742	145991		23812	32851	16366	5482	52145	8697	670406	40464	1642	2450	3507	29842	7638	10000000		1421	38072	10000000	2699161			12216	21445	38681	2241
120	54116	24663	1997	10000000	60294	4103	14933	2251			3165	457201	95609	16508	78382	101352	40892	10000000	22233		63695	7237	81729		12285	31246	25245	6735	107107	12603	77699	16066	3706	1837	6090	13514	23182	10000000		3717	11559	3013	3010474			5959	13986	4657	100883
121	79938	13509	1715	10000000	43906	2487	7357	26062			1495	4061	178834	50456	17865	10000000	36191	10000000	21173		51843	10000000	59010		8827	16422	14031	4567	4598	13074	233429	69415	2348	3768	1543	27100	16482	46133		1249	9553	5867	1257008			6211	16078	35554	4412
122	55491	12177	4858	226105	47172	2206	2349	58054			1879	102254	51438	11893	10857	313740	26830	10000000	15845		3901	66346	45077		13852	27074	43241	5783	47641	3517	1160080	12119	6251	5185	1644	78734	14529	10000000		2273	10000000	12281	3699617			25882	5226	80545	24788
123	23421	10000000	15254	10000000	32530	1763	9361	21732			1447	177764	158410	64481	172860	10000000	6484	10000000	118693		40522	13096	91364		13153	16829	29692	21736	51652	11997	199004	4390	6316	3276	1894	19910	37601	40051		2274	60970	10000000	543926			4066	15980	10127	2236
124	324019	10000000	4057	10000000	65535	3900	1702	17890			3129	50176	205214	1975084	151280	10000000	8194	10000000	66409		60644	13330	129679		13111	10000000	195639	43043	12234	2814	458154	24358	12916	3118	6656	44719	10000000	24647		1316	29033	10000000	1722615			32525	41491	95672	5596
125	11933	10000000	2759	442916	55875	1660	5826	50526			3881	19475	135652	18558	3769	23429	6095	64578	12266		28188	19941	34819		10000000	46731	22768	3906	64786	6141	755430	11079	1971	3586	1570	166953	25316	62884		2607	52083	10000000	1284903			22873	2205	15005	8406
126	100910	7832	1170	417398	52212	3495	2821	45636			1718	278847	250756	83566	92588	26721	10000000	21459	3484		25211	12849	22617		10678	59773	10416	4307	4184	10000000	139589	50005	9341	1917	3629	94528	13846	10000000		1408	18826	5918	2277083			6541	31563	5566	13172
127	22593	14651	1676	10000000	83561	2602	8253	10000000			7238	16406	185074	10000000	287510	107579	29336		14368		3034	16548	139397		13630	93851	11019	11023	14120	7492	5328	16129	8358	3204	2254	1334	19033	8852		1833	17157	8473	750389			8079	11182	105342	6622
128	182521	1766	2335	130594	29548	3432	14073	10000000			3903	144262	443508	39294	1722	10000000	3311		11165		8968	10000000	68211		30788	17863	6857	22526	95999	6679	86395	55371	5820	2430	5466	75968	10830	30056		1911	66308	10000000	2919716			7566	14490	22948	130235
129	95433	10000000	1922	10000000	61045	3463	6275	53911			3444	2101	45396	49567	449925	10000000	3567		113086		31865	6948	23869		32516	25318	30851	3124	23301	5756	31528	42421	7141	1410	2322	7971	20690	17935		2997	22345	4603	472025			3042	59915	8502	2025
130	33195	10000000	2995	10000000	10253	5551	2762	40776			2791	64746	79350	25957	114099	159663	7628		35044		46282	8841	30915		59423	34962	101119	5380	88296	7525	15303	88051	6368	1875	4054	31034	19773	10000000		2409	25514	5585	617358			9927	1456	10255	9316
131	80697	10000000	4662	10000000	2111	2042	2820	105948			1851	599830	60095	13644	422003	10000000	22437		16231		37986	7028	53046		20596	41127	88952	6207	48688	4739	337760	85767	7285	4937	2656	8712	10000000	10000000		1260	53990	10000000	113985			29504	17671	23478	3394
132	96881	6372	2218	210471	14856	2754	1764	14606			4242	299957	513909	47056	108018	46986	13052		29087		16337	10000000	288815		38717	15274	135926	11021	28118	8936	44475	18568	8451	4364	1337	20942	15799	12418		1738	15159	10000000	2616833			2809	11393	8298	12499
133	66932	9513	5477	196057	10269	3894	2241	10000000			2877	506217	812431	34070	105311	23114	3585		70087		33854	10000000	153494		11254	20850	13577	45427	5233	10756	30201	16858	1456	5456	2122	90228	24896	21654		4083	18887	16436	591742			11521	1455	63694	10641
134	44712	10000000	3641	10000000	14443	2648	1517	107165			1974	636955	331268	30941	98977	165596	12582		66564		23412	10784	206748		14231	17101	38628	7280	8839	13992	332451	8164	2585	2226	1399	120496	38880	35130		3261	21777	6135	128446			3148	16653	108100	74609
135	15252	19805	3393	10000000	38598	1896	2341	31734			3322	137710	24221	9648	213573	346780	10908		93688		30129	5624	109920		31942	49985	26008	35217	44540	10000000	317738	14207	2548	2251	2316	100258	61793	10228		1278	25074	14985	2856262			11785	20413	7094	1563
136	88733		1653	10000000	10047	4082	3188	17648			2484	125998	10371	66768	261328	218801	3156		115531		17886	26449	76296		19721	76448	46722	30384	20767	8516	508370	10330	4719	1395	1209	19246	10000000	20073		3282	45577	6298	227473			18528	8210	24618	36356
137	15293			10000000	36379	2415	2092	51156			2803	14999	236577	8646	89138	10000000	5623		15393		61872	6072	141051		57256	45589	23659	7875	138406	2640	268889	69156	10668	1387	3743	31000	106506	11677		4009	29498	10000000	603368			3001	3644	28028	245890
138	176423			10000000	15374	5523	1900	9947			7542	364423	530687	40775	63863	47670	5973		173867		32418	10000000	252887		14068	44723	22613	20129	35318	9482	79594	10200	5196	2199	1250	13741	4464	7600		2118	18894	10000000	5687058			2795	11035	55585	25731
139	103769			26685	46543	1972	13656	24900			1810	445956	402863	19679	5719	158762	19168		15150		18864	13548	92592		14113	25017	63194	4540	15588	7468	19095	8858	14088	1316	2537	72711	32319	19069		2881	33037	10000000	943282			18576	6126	5582	44061
140	59875			10000000	72027	3390	1665	66360			2629	35962	30571	20128	73784	25477	4215		13892		21458	3273	32389		10000000	30879	145214	27540	42553	6376	175390	48440	3669	2010	1136	116973	15080	10000000		3171	47410	16218	635958			20505	13067	4247	25981
141	70127			100222	24572	2143	10072	31854			6096	227697	143252	13999	33608	82426	8847		69027		1976	23068	80218		10000000	24408	260570	14547	41965	2258	367497	10921	1414	1721	1309	46185	16125	29630		2452	65652	4756	4020344			4577	45283	30450	2076
142	29021			10000000	2538	5467	3474	10000000			1854	392660	252337	21459	196266	10000000	2149		3592		19018	12579	88039		8657	18525	2128	1444	37683	4778	322383	25282	1342	3833	2253	35277	39824	44074		1294	53595	10000000	4527566			7264	15601	14519	1483
143	96619			52291	18209	5740	4990	10000000			4894	128705	66712	32248	70855	193172	4862		17892		43503	39104	235777		31988	10000000	86821	4231	17369	3591	610542	10613	10950	1337	2418	10676	38241	10000000		4381	39195	10000000	814953			3553	1644	117722	33117
144	14648			10000000	158389	3188	2074	109821			3328	206290	231038	22076	84857	10000000	3263		33605		29845	35441	165887		18647	38975	29544	21149	32640	5559	25423	34753	2236	1622	3763	7757	6524	10000000		1415	18533	10000000	802001			4921	3685	8269	36049
145	51574			28588	40609	3604	1585	2928			3195	104031	225214	71765	16436	164428	28894		4015		25306	10000000	34036		10018	52743	109585	5970	18060	3246	535804	60564	10139	2013	1748	73812	24709	13226		4882	29841	10000000	5244181			4488	6215	65767	97182
146	15417			10000000	9137	5673	14168	10000000			1927	307332	474713	12457	206789	80065	14040		56599		6179	57159	92561		11301	20467	257175	2966	97488	6929	307605	33402	1322	3607	1919	13291	27394	65576		2566	23499		193497			24363	11759	9029	8977
147	10529			10000000	64540	2929	5494	64136			6652	581646	23470	24128	174598	222775	10000000		74471		4578	5085327	38614		31597	32539	2105	17836	19256	8603	147670	23991	4494	4874	3804	4808	7671	6575		1601	12297		4117081			9186	3199	31593	5208
148	108959			10000000	8921	3245	2137	28024			1696	15470	783801	40310	5383	32926	49552		17656		42759	5217098	86455		8203	47730	40857	2717	12324	3714	50596	24805	1415	2784	4457	13248	8673	10000000		1333	93441		2724895			1963	8459	9385	12480
149	6310			57441	4403	3468	4978	8217			2026	18336	80820	16867	382688	200417	4248		4248		78242	9994	117241		42359	25871	15423	12025	23623	4651	8211	156119	10333	4363	1499	13034	19944	10000000		1737	41735		9359369			5769	5823	24451	4291
150	96309			545475	48597	2542	4266	33899			6707	357965	31334	47159	152404	201155	3224		75653		11054	10000000	201301		18937	38143	78392	6169	15649	6209	186084	12102	3275	3545	2935	33620	10000000	10343		1315	10000000		1480400			9042	11511	3282	3023
151	166228			10000000	16433	3056	4197	10000000			3911	8634	320583	32904	104226	15999	23326		38566		26909	10878	95551		11549	24997	62271	12858	19652	5193	499171	13827	1768	7649	1942	51420	7476	68550		3151	30575		504779			6776	4519	59179	114326
152	195369			10000000	79052	3866	2290	10000000			2184	30778	247834	31891	118855	170950	14575		110338		43787	10000000	108593		16331	28141	9072	11163	14791	10736	13559	18360	4146	1891	2123	47540	10000000	10000000		3584	20793		5478214			15795	5057	121309	76359
153	75900			10000000	97782	1916	4356	10000000			3164	193648	9778	38052	322646	127978	8132		57171		9423	33380	160841		28567	37541	162865	4876	4430	4012	951451	10000000	3392	2273	2025	39815	10020	10000000		1950	17250		7403872			14334	5337	11506	73258
154	414097			10000000	5358	3221	3044	4053			2097	651987	278251	12415	17741	131995	6131		40999		3384	5618	38408		18823	46609	76679	54064	7829	7473	13127	48212	1241	3080	3216	11592	32325	10000000		1379	15561		1077091			2985	12043	26929	12428
155	446305			10000000	39606	1706	2162	10000000			3372	1113131	10784	27023	171176	78428	10000000		13431		71081	201575	38723		10923	29361	19947	3719	91422	2000641	151876	6090	3727	1840	1202	43989	13367	13231		1253	28677		417075			50132	2848	18896	51603
156	136604			226105	98050	2430	4563	13026			1511	241170	75236	44157	8935	10000000	22142		7632		41963	10000000	79326		25181	46308	1595	18579	11703	2864	213581	61825	1754	1506	1813	5782	18075	9492		3498	63870		212836			27690	2801	55422	51247
157	30168			10000000	35202	2284	2069	54659			3347	5991	236810	17054	60923	17142	7870		10126		29429	10000000	174891		16861	48963	38662	24140	34165	9181	140192	10000000	4909	2498	2090	91399	14679	26109		3788	31605		425441			3746	8803	7020	76768
158	5674			38610	65195	1568	5539	8092			3578	22222	4555	34480	99573	10000000	4289		1653		11199	16833	228111		26573	34243	9438	6023	132548	4140	7644	36430	5387	2027	2715	221372	30128	10000000		4061	21161		6033131			7055	3799	86561	8807
159	363328			10000000	45364	6318	4771	47654			2224	80908	253031	40134	109196	10000000	7878		7851		16754	381224	80761		28177	74148	100444	2442	20591	2644	205150	17595	1469	2354	5455	34461	18249	10000000		1499	19705		8475896			19276	34103	46785	100460
160	5308			10000000	111872	2377	2171	27273			1944	65299	208181	29028	182967	204621	38295		47870		38790	6687	68155		24208	39120	82367	62331	19930	17168	21531	9871	5904	5622	4324	87764	22693	10000000		7500	22954		1291054			15325	2200	13219	13319
161	120182			4358026	19857	5209	4580	2251			5634	413408	708161	82180	64042	110515	1987		69718		9675	5933	53663		18638	73197	17124	8040	1779	7498	355140	4327	5223	2834	1588	7470	10000000	13058		1592	17705		95037			9371	1907	42280	18483
162	2604			10000000	6392	4333	3781	26062			2723	141931	188051	20683	56319	24317	5310		1803		35229	12838	108004		10000000	12327	164062	4985	19593	8283	617937	8054	1567	5236	9847	8496	17584	10803		1564	15563		4277339			6705	4657	38992	47790
163	55131			10000000	8981	2120	4252	58054			3193	3140	173432	13272	4336	68435	18634		34069		13727	10000000	21897		15908	15557	26698	10721	9265	2295	99201	4920	2777	2401	1415	54304	20623	5425		1332	20648		6100490			5135	4166	104506	24538
164	5556			72232	6035	2277	3370	21732			2820	335767	15520	42278	32712	136295	2807		68574		40026	25017	13727		11986	52387	15437	36195	13872	8654	75166	44791	1590	2185	1441	39942	18770	10000000		2543	41806		760831			23918	2254	43851	3373
165	1902			778084	7984	4538	5776	17890			1672	321604	99424	39182	50187	10000000	18839		19270		36829	17573	14141		16693	10000000	10780	44115	62411	4603	90941	116677	1688	1664	2583	15142	15311	10000000		2244	26672		2474701			11969	15506	85878	36855
166	22852			34981	63061	2964	8209	50526			2958	16049	1332849	19358	371782	252230	24076		83208		32256	10000000	128074		18664	14718	3784	16257	94174	7485	101381	27394	1276	2869	3702	147131	10000000	13372		1327	167488		1345622			7116	7848	49975	4877
167	249424			2071025	17540	3747	7240	45636			7002	305382	332610	103737	27274	233478	6336		44994		40458	12631	178601		16246	25314	61944	5425	23117	10147	125783	4622	6819	3416	3711	53422	31700	10000000		2269	27860		1266549			2878	17160	34419	2090
168	10276			26658	12538	3650	2291	10000000			2115	244351	284606	15032	257675	55730	9350		21318		1617	190448	17797		15806	26644	17185	9574	3305	4502	302233	5934	3002	2636	1427	41784	42836	6267		2149	10000000		1737564			5261	50527	28070	120064
169	67870			10000000	11566	3025	4546	10000000			3313	258721	167966	16044	179623	35344	2873		28482		20131	13310	91228		23971	16330	39134	3120	3015	9493	13912	24743	2101	3135	1495	10877	9743	10000000		1349	20360		8404421			11090	2780	15817	7896
170	101232			5079	40485	3834	1675	53911			4241	138605	1537335	25014	41365	7978	7761		35277		34034	10000000	49858		11760	35872	48598	4355	32821	10000000	247028	57645	8412	2601	3086	36610	16078	15059		1413	41803		2050723			9410	1816	15748	253741
171	48895			611051	6612	2396	2266	40776			2969	122125	902879	18703	292257	10000000	8900		66984		11101	7736	29131		20844	58646	15957	26025	58796	3026	10068	64446	20522	1401	3778	22342	25841	10000000		1993	49084		97725			3719	7751	6668	50562
172	235178			34527	48876	9637	9934	105948			1945	180155	16517	44460	290319	19570	30111		43064		31140	10000000	439145		10000000	41290	3098	17013	1561	9511	5385	41711	12520	1829	1396	45744	10000000	10000000		2738	28852		5791264			3056	5991	24652	14531
173	40503			10000000	22431	1669	1721	14606			1452	59002	216147	64324	140464	46612	12068		67365		4342	10000000	121406		10710	14215	12316	3019	17747	7430	244505	10005	5564	1707	4613	17037	10000000	37291		1887	15777		6012920			8931	25419	78598	46168
174	10957			131719	22288	1493	6745	17648			3709	162643	415768	30013	111186	10000000	3276		98934		7585	50915	37013		12499	32519	168035	13676	49565	8028	81428	5859	1856	1648	6804	27168	14481	15559		1195	39781		103660			4219	12367	99528	7171
175	91644			54353	11380	7149	1871	51156			7294	376154	33526	8690	96009	10000000	29539		120647		11120	79490	58119		9656	10000000	115149	20898	2930	5066	53252	51874	1766	2651	1573	34801	7700	5412		2267	30937		690300			2853	10335	62415	30914
176	45949			10000000	27109	3099	4697	9947			6293	66369	897850	14831	74361	239258	22133		22818		1531	10000000	26248		58471	23157	124332	14057	2376	6177	131210	23038	1670	4910	4010	10857	17272	10000000		1427	12856		1917696			47116	3016	73239	4778
177	35489			61084	19326	3737	10384	24900			3169	85655	790070	33352	13907	30712	15140		11799		10175	10000000	34716		22557	16862	80176	5560	117806	3766	94308	8297	3043	6874	1387	50903	15169	6335		1946	29127		1660543			43842	2949	3096	14159
178	6114			10000000	11699	4331	6922	66360			2957	258794	536811	31552	37482	73736	20300		139787		31479	14497	49133		18234	22200	26652	17433	4644	7120	135522	3479	4348	1428	1422	60778	10893	4644		2910	37925		185255			9884	3179	9170	1451
179	109440			10000000	33023	2555	6130	31854			1843	38998	65468	29028	55124	95099	28713		63404		1745	6330	81325		8787	30064	144652	18718	56784	11529	150822	10084	2344	2296	1388	46677	22050	6909		5905	21170		9234441			11238	2846	3822	25214
180	3004			45321	12958	2171	3455	10000000			1524	106358	43300	44619	18700	611147	40148		9923		4480	10000000	14952		14952	168447	166799	33505	85343	5740	279418	18841	3168	2351	2490	106243	24012	10000000		1445	10000000		2699161			49299	12821	1773	22824
181	86723			10000000	15825	2923	2557	10000000			12065	194614	1098525	9500	21883	59100	3568		25987		14061	19962	16642		10000000	23682	118484	11888	34117	4577	906140	32666	5788	2396	1405	122542	15096	10000000		1929	25196		3010474			7282	34716	63248	5151
182	46540			10000000	11022	2216	7871	109821			4065	118977	327257	21117	23662	13534	5132		33667		35345	15196	143661		34730	21382	30985	7931	25001	5460	109063	22251	1217	3408	3381	134683	19320	5924		1926	26797		1257008			11872	10485	9452	57284
183	32011			132500	60417	7601	2655	2928			3453	124620	533029	31611	183202	503526	3991		39619		14142	8078	151645		15176	14355	65156	1821	13761	81175	41770	43447	2518	4362	3022	38485	29480	15285		1743	74539		3699617			11205	14093	6901	65086
184	13158			10000000	31813	3002	2320	10000000			1829	209845	60433	29676	45526	23276	1954		13375		13645	14975	17117		16997	23083	6004	5126	45768	5112	147737	27732	3563	2596	1486	31757	8094	8527		3283	61978		543926			21992	6856	64949	96866
185	104644			10000000	6583	3015	6987	64136			3118	404109	36775	24482	428514	176440	10000000		3857		31991	6503	39929		6520	67093	64133	8805	4845	3265	213206	10841	3679	2084	3808	11664	15986	39856		1471	23370		1722615			15068	8465	5652	41552
186	124112			10000000	66357	5044	3706	28024			3893	212508	413024	43790	20689	10000000	4870		5470		48252	52477	12966		11509	42676	161570	5833	20758	4026	494014	10062	1800	3110	2582	21038	8862	1908		1321	45810		1284903			4866	4122	52008	31861
187	52533			25855	25363	1803	2570	8217			4415	93837	219719	13294	177525	338996	7062		18634		142403	5481	202198		18320	26252	58655	13169	170680	9023	126863	18896	9128	1575	2969	34029	20766	10000000		1400	25426		2277083			53416	13466	47679	9159
188	4625			10000000	93806	5449	3084	33899			5372	226302	11097	40736	57305	87071	2812		95984		47117	10000000	57033		38404	13879	149751	19756	11754	6357	102993	13801	2067	9449	2369	8159	24692	10000000		2452	45567		750389			20931	8572	22755	10995
189	98050			104387	68517	3454	10395	10000000			1724	144337	378360	46607	118964	92610	10000000		79834		1392	10000000	163976		21019	18119	9617	27752	33041	4213	132457	31046	2712	1468	3300	12490	10103	13183		1567	37652		2919716			9594	2611	72432	65925
190	30960			10000000	8178	1455	7906	10000000			3856	175015	358286	17298	83079	10641	23567		7881		28713	10000000	14865		16937	36900	81191	3248	3201	5574	220194	30836	4348	3535	2138	66408	23061	17535		1259	33357		472025			2944	12444	2738	27877
191	185460			9749	16264	1613	2488	10000000			3950	88701	217995	14655	46666	10000000	5264		65295		1442	48919	8705		29810	45437	81894	31030	44468	6694	40614	18306	1596	4243	1442	132006	17499	2632		2196	7227		617358			10179	10032	34635	34201
192	120786			10000000	15749	2302	3962	4053			1887	22558	157415	18258	20962	528552	2771		52845		19540	42752	193308		9706	34520	21794	12008	26866	2104	143074	6672	1377	3084	2586	13699	10000000	10000000		1398	19694		113985			3811	4153	8504	12128
193	57677			10000000	57588	2074	3848	10000000			2249	102932	298533	21428	32546	10000000	6936		61879		37319	10000000	25137		8384	29331	32251	4178	24657	10000000	105675	26562	1713	1379	7566	150665	27718	6263		3801	10929		2616833			2294	12577	39502	20628
194	151839			10000000	90309	4818	1951	13026			1853	818499	670286	14252	16230	10000000	8348		36788		86631	27913	73370		10476	19647	191732	2926	10519	3235	1113567	8513	3225	3928	3055	91520	19514	10000000		3863	24772		591742			11159	1599	43501	49986
195	5237			10000000	5198	2651	2885	54659			4050	412042	262615	11382	96597	38476	9245		11073		29308	75953	55328		16685	33289	10632	8533	28361	4534	96477	11698	4028	1657	1811	12063	22381	23479		2066	39600		128446			5040	2534	14569	90391
196	99420			155504	79788	3954	2100	8092			4831	592501	128344	15434	103045	10000000	25743		9069		38373	10000000	91144		11403	53062	20110	26448	6285	2118	195483	44208	7599	2752	2246	2876	43953	10000000		1313	63368		2856262			12506	8042	23914	32730
197	65892			10000000	42036	2820	1965	47654			2759	123512	98439	34462	123787	105851	6465		23073		11685	10000000	99033		10000000	29880	52211	4406	2560	5943	623015	31415	3073	1858	2295	52498	7974	28297		2114	9691		227473			5931	12643	35216	66819
198	5184			10000000	3494	3100	4162	27273			2696	113416	53146	23732	56592	10000000	26362		60780		10493	191801	85592		9470	23145	49846	7095	4392	3054	664354	53919	2232	1240	1892	13643	17542	6604		1712	34769		603368			3528	3605	119573	12656
199	21018			16936	39700	1813	7451	2251			4970	116823	533216	22942	137614	10000000	2759		75045		11539	9897	32136		9494	34349	62849	35220	34452	30344	69149	28778	1965	2630	2731	27102	22484	4527		1725	25090		5687058			15445	1800	29944	40716
200	8394				6546	3557	1776	26062			4186	1181877	94213	43556	42370	10000000	20666		69092		12188	18162	42908		21766	13476	6899	7059	9140	4303	293022	14228	2541	3580	4737	8311	9350	24185		4516	16148		943282			2286	7592	15432	14795
201	44954				8736	2437	8339	58054			1948	53114	28237	23375	88462	267925	12926		50524		19905	81696	20065		39560	52209	28507	6918	71858	7353	236817	12026	6220	2257	2901	51273	15471	20233		1354	38635		635958			19182	8955	10502	8908
202	29224				28942	2240	11052	21732			6964	33809	276109	14200	199589	10000000	14478		51838		9415	17802	263333		6892	59157	3033	4856	19713	3565	76345	116661	4873	1936	1678	64896	10000000	19798		2645	10000000		4020344			8010	17328	63204	66718
203	130874				27637	1887	1722	17890			2551	370686	204060	18210	20031	10000000	3981		97280		30701	10000000	20969		35494	21656	22233	4332	20676	2675	190967	19551	5919	1991	7108	75017	46062	18104		2114	17131		4527566			15942	24322	55776	24705
204	59659				34069	1633	6466	50526			4400	203192	354503	31620	416617	479801	6418		35684		9282	2295413	96901		12070	27747	5394	2511	103414	3512	37914	4007	3251	3763	4607	63518	57505	12500		1945	30576		814953			12115	2433	9076	6366
205	64672				65361	2267	23715	45636			2828	424875	256215	12766	141103	18888	44946		28130		2016	1579257	50046		28792	10000000	119992	8625	31868	2966	99839	19958	1546	3819	4676	87832	6796	10000000		1942	29394		802001			28764	21101	6846	9210
206	154789				35378	2696	5643	10000000			1698	29370	30291	37922	6835	10000000	5267		9019		26861		220001		26408	55368	197155	15947	25422	3296	455559	10000000	14050	3233	1831	7454	44518	31908		3403	24871		5244181			51000	2226	4943	35104
207	62731				36901	3233	5281	10000000			2273	419803	98205	54615	187599	69352	47485		157098		18425		47779		26270	25633	84563	8964	38986	8331	1216891	34247	3932	1561	1349	43073	15304	10000000		2143	78058		193497			6749	6541	3936	2697
208	73154				58762	4325	3938	53911			3014	172677	146908	10000000	156579	100822	2395		74536		11236		63069		6016	17472	198260	3175	21750	7286	49561	14967	2967	2913	2846	6892	10098	7536		1225	36681		4117081			4564	2778	103932	20550
209	16696				16093	4053	1937	40776			3432	20499	395451	13626	273721	591170	4839		13954		37557		120276		6018	26701	6568	22389	6343	7671	393828	32197	2857	3347	1839	10452	15516	14915		1626	24069		2724895			58580	10367	68871	57797
210	242255				34043	2418	3096	105948			2393	297457	250040	38561	214707	10000000	19954		47767		67399		5989		10000000	56050	10142	8428	19000	5490	46198	15246	3002	1381	1980	14737	591066	15106		1650	48985		9359369			11889	3386	32795	4338
211	9012				27093	1992	2699	14606			2525	94981	173870	12972	45242	198009	4230		20807		20060		17154		21011	34318	56593	25859	45322	3961	66038	36155	2040	1405	2263	186820	19445	10000000		4635	16174		1480400			30820	8715	14982	49388
212	175590				23189	2511	3237	10000000			1563	499805	371632	27867	178333	10000000	10254		33896		14647		23689		16172	52649	50863	8915	25045	6100	57943	10000000	1455	2414	2088	14233	16822	7882		1581	20106		504779			14455	28508	165043	8386
213	311157				95046	5113	14012	107165			4511	67498	375136	27880	84355	59057	8130		5237		8309		41201		77766	19636	8610	19872	11501	9075	240438	17089	1931	1615	1892	4479	10329	10000000		2705	27897		5478214			5827	8654	2826	13538
214	56905				13330	8968	2605	31734			3413	375730	665767	29561	39418	14914	3201		83768		8290		58223		26270	21303	99283	4282	4557	5978	407177	34614	5725	7219	1316	72985	20926	25442		1879	28593		7403872			4038	2242	16204	34031
215	70978				54306	2225	6319				2719	170628	383492	17570	188180	46122	10000000		18272		45776		134541		24564	31513	11198	14091	45967	4807	88383	81622	2844	1767	1623	36667	46550	10000000		1546	31201		1077091			13553	4301	88178	100539
216	31802				23759	1668	1812				2236	55996	711087	29201	87093	24799	16522		5754		133976		155303		59798	23241	50829	12123	117323	4809	37349	19737	3569	2104	1886	54071	14580	10000000		1343	10000000		417075			11830	22491	12389	124451
217	26467				10745	5046	4791				3265	73806	4518	12775	300974	158774	6335		70338		57605		8885		23512	14886	15864	17464	23068	8322	377320	16929	5377	2346	1415	65153	14260	154335		2455	23575		212836			9431	4330	8654	75526
218	9554				6973	1965	1683				2508	140376	198168	10000000	235557	62569	10000000		92666		14376		21636		27057	16361	10285	2530	28291	6820	67018	15880	2150	2535	2089	62950	27501	10000000		1366	20760		425441			19773	11195	53947	74685
219	85561				43074	3019	1953				2833	311923	48197	28982	45261	121810	4071		27507		29343		157794		23812	13351	19768	21405	42034	3320	679736	22304	1294	2110	2398	78884	39490	39815		2622	27408		6033131			12216	21028	38681	2241
220	69509				13897	4103	5134				4031	316902	1006975	30792	5341	247881	4896		5019		1953		158027		12285	48922	10593	28024	32735	7218	43566	11230	9950	4244	1745	5558	24428	12965		3176	49123		8475896			5959	23158	4657	100883
221	104910				69112	2487	5870				7182	66898	378338	43923	55101	63967	3074		66426		2578		14177		8827	34721	91936	10103	16458	12701	683957	15405	4005	5974	2098	37403	19290	6268		4693	327115		1291054			6211	23335	35554	4412
222	58868				12150	2206	11521				3015	100089	233369	36039	18140	96998	12520		59141		24735		50392		13852	27821	136624	6836	16096	4278	387082	82266	2621	1740	6515	19841	7878	9554		1316	10000000		95037			25882	3209	80545	24788
223	96059				6209	1763	2479				2259	69117	423634	8645	15415	45413	9315		66383		60780		22215		13153	47640	48043	7603	9680	5350	1035207	7121	3115	2162	1777	23084	31429	8316		2715			4277339			4066	22253	10127	2236
224	135235				8347	3900	6720				2452	89029	139854	14616	114351	10000000	21647		20708		2978		10662		13111	10000000	6856	22703	147304	10112	11196	10000000	4456	2769	2132	10428	11747	19485		3123			6100490			32525	2003	95672	5596
225	59749				19370	1660	7881				3767	55315	949105	43316	40835	337628	3439		28222		3646		269288		10000000	27401	8938	14618	121363	3462	846150	8258	4831	3206	3627	33339	21760	14936		3321			760831			22873	5247	15005	8406
226	1394				4017	3495	3918				2874	274737	1850281	9476	24423	33763	21316		24764		8396		49947		10678	13121	2323	4666	93139	19672	343696	17372	1435	2149	2116	1254	12634	10000000		2024			2474701			6541	3029	5566	13172
227	115566				41128	2602	5666				4920	44709	586020	46872	33351	332133	9270		9506		15723		59801		13630	23605	74752	4206	29386	5920	245936	33297	7241	3833	2364	50652	37339	10000000		1267			1345622			8079	17690	105342	6622
228	193271				64889	3432	7606				2930	9342	291717	12154	130144	159362	4395		7705		19551		5159		30788	10000000	23885	13746	4892	15730	524525	6585	3861	5191	1187	52248	10000000	9874		1445			1266549			7566	7768	22948	130235
229	31128				82947	3463	5210				3494	55091	278933	45521	36300	40887	10502		10636		11423		11242		32516	25412	100763	6602	4939	5497	585655	3241	3087	1645	3111	2936	10000000			1278			1737564			3042	2794	8502	2025
230	69361				45457	5551	3691				4594	443908	288294	30006	103723	57771	7207		1851		3444		58269		59423	42955	101836	16865	9553	3877	489808	23982	9450	2421	2192	22860	38278			1489			8404421			9927	9652	10255	9316
231	83286				18326	2042	2003				1614	332397	852335	23272	309833		60950		26973		28231		267593		20596	18027	92877	17281	23559	4998	250974	7577	3050	4094	1532	11392	32752			2276			2050723			29504	3181	23478	3394
232	19938				3575	2754	5152				3213	2232	524518	8252	57238		30249		11961		6672		154743		38717	28406	2666	8110	30254	10000000	52286	15093	19910	1782	1723	92822	9057			2797			97725			2809	6116	8298	12499
233	59892				6473	3894	1797				1428	624532	55444	35899	140338		17677		27144		4618		16918		11254	26814	45499	5778	3521	21631	614338	33856	3567	6704	1421	18473	10000000			1949			9882172			11521	3636	63694	10641
234	31161				55792	2648	2893				2302	37969	466572	24181	170889		20162		32563		13279		43422		14231	20088	15850	57248	1468	3511	181723	13092	3125	1774	4611	142677	19573			2259			1069501			3148	16420	108100	74609
235	88090				20505	1896	1970				2052	100750	472514	24838	11889		46790		44187		14122		155996		31942	15772	19894	2018	3733	252064	67753	32725	6731	2208	1280	44106	33866			2785			1021774			11785	3106	7094	1563
236	7554				49176	4082	8437				2091	320763	282641	10701	424569		10317		29008		8448		38142		19721	52887	13650	10740	17643	10146	493016	50296	1413	2248	2551	254933	4647			2393			1949325			18528	5377	24618	36356
237	145023				34580	2415	3276				2657	216921	749235	21664	34979		12348		73475		49410		287309		57256	15469	5350	3995	73011	9412	243959	7848	3030	2951	2325	19030	31169			3401			1314945			3001	3993	28028	245890
238	8416				59016	5523	4304				1820	177885	8601	19828	99276		9384		18369		26549		401583		14068	20853	18768	8888	31095	4188	76160	36121	3043	3648	3978	20235	21156			5686			657429			2795	2789	55585	25731
239	126127				11275	1972	2709				2694	205842	45740	8037	593310		11124		65898		11032		83227		14113	40240	152157	9997	18168	6483	511413	13341	1595	2098	1402	4012	33782			3788			2894015			18576	4762	5582	44061
240	22322				14013	3390	9453				1976	382813	548956	6833	39373		2396		1627		67105		161983		10000000	14083	105555	3282	33902	4301	115738	17509	1563	6888	1422	2182	7434			1251			2985565			20505	27559	4247	25981
241	108143				13887	2143	9717				2601	32774	103045	52600	262059		12548		8001		94048		225524		10000000	21900	69883	8828	42006	8869	164163	8600	7341	1881	2343	16027	20322			5461			241714			4577	1705	30450	2076
242	90538				1944	5467	2659				3642	86526	74449	23457	7492		9201		67164		62540		173575		8657	46742	1838	4166	8709	4613	546880	7974	14860	2066	1325	2989	18990			1550			9706983			7264	10128	14519	1483
243	36850				46344	5740	3583				5954	13349	357334	32638	52510		20478		31899		26490		58312		31988	51763	7166	20233	10516	4170	128759	23195	3875	2582	1467	59352	10198			1434			7185627			3553	3568	117722	33117
244	40173				3426	3188	1468				2076	250152	166671	34557	156433		27102		40758		20777		32511		18647	27406	8094	10542	33089	4799	152220	10000000	4315	3154	5149	59967	10039			2622			3343900			4921	24923	8269	36049
245	24733				54731	3604	2507				1490	237752	428661	17755	14055		13419		25157		15928		94200		10018	45897	315642	9027	8314	9404	40939	15048	8709	4289	4507	57061	11780			2041			3298431			4488	18129	65767	97182
246	36840				5925	5673	3131				3496	180200	800810	30574	140178		47984		31798		10894		18969		11301	73554	93014	22000	10917	4155	220236	43121	2305	2129	1776	7194	26781			2310			1725453			24363	11718	9029	8977
247	10097				14714	2929	1809				2176	419277	1733358	9072	18235		21905		7200		11382		334978		31597	30558	27649	28747	6262	3069	46972	4977	5893	1697	2803	5307	8639			1389			3183576			9186	8167	31593	5208
248	29491				1357	3245	5757				3296	300547	316750	10000000	198191		7235		9154		28733		420152		8203	15202	57666	6218	15205	3889	183048	10373	4172	4367	3609	89768	10000000			1880			721192			1963	30291	9385	12480
249	52955				90427	3468	1826				5023	373175	381203	16100	89282		9182		13883		18347		38783		42359	36824	40468	4806	14945	3524	707318	7115	2242	3417	1858	32360	18121			3197			139667			5769	3192	24451	4291
250	18510				80924	2542	3745				1878	34204	577484	46747	64694		11083		45639		25082		3606		18937	13483	61995	7942	46498	14755	666602	12682	9385	3978	2386	112053	30782			3793			367784			9042	10048	3282	3023
251	30551				19892	3056	2158				5618	1804	20738	32413	63062		41692		17857		15924		30346		11549	39100	215070	13941	9579	7679	276449	76457	6108	4748	1615	57226	10599			3179			5251132			6776	13604	59179	114326
252	37421				21838	3866	4928				1844	107332	1049640	21440	27430		6734		8905		14634		107320		16331	91576	144778	4056	38369	3468	394866	60943	2850	2001	5719	23934	24786			1786			1117701			15795	25092	121309	76359
253	182630				19622	1916	3863				3800	233345	131391	29044	4195		3162		53528		29413		62013		28567	20440	142834	22197	51011	9330	1366058	11037	2948	2013	2845	170414	12732			2342			510704			14334	22972	11506	73258
254	95372				51281	3221	4654				3221	38198	608061	22429	1553		8847		30733		33044		7546		18823	68380	24862	4642	66618	7738	271259	6999	4813	2570	3135	15639	18186			3217			3352004			2985	33029	26929	12428
255	48441				28228	1706	2943				3446	16182	406564	17237	85927		15840		40185		11119		27515		10923	75424	70368	9205	5150	6234	194346	11345	2816	4730	1260	95879	1541			2128			1189792			50132	2322	18896	51603
256	52611				6240	2430	6686				2864	22980	82648	31137	207072		10000000		93857		13207		115968		25181	10000000	27538	13596	5653	4373	97061	10596	4726	5378	3193	110244	36781			1961			9705251			27690	4681	55422	51247
257	232192				25899	2284	2303				7383	139319	380730	13789	197112		16765		90590		78858		7387		16861	88666	45299	9917	33247	5853	478477	27029	2969	5486	3522	95915	16456			1750			2930299			3746	1582	7020	76768
258	13519				24826	1568	7007				4804	822080	863701	18668	11180		17607		78137		5640		362749		26573	41527	98834	9515	13967	3673	47306	9962	2352	3282	1340	177134	9870			3632			444844			7055	54780	86561	8807
259	8694				6756	6318	2208				1884	1170970	224449	36423	69287		3744		5876		13689		7154		28177	29031	110395	24631	9885	5281	303715	40359	16625	1607	3492	22217	10886			1447			1798483			19276	58857	46785	100460
260	96443				4052	2377	1569				2832	60182	521235	8587	322003		11901		38243		12342		68190		24208	23973	63275	2383	3618	3914	305182	18960	1934	2932	4115	32548	12788			2023			767511			15325	6817	13219	13319
261	66684				52642	5209	2087				2588	101560	351077	52892	47857		10000000		3401		17209		31981		18638	38596	5300	5798	3103	2459	196780	8026	10250	2186	3964	54471	27522			4798			1464801			9371	12870	42280	18483
262	6352				6534	4333	2339				4162	6881	596088	44710	35172		20503		29958		11420		29909		10000000	31816	83721	20177	31920	5958	146743	13553	2795	2117	1359	64213	10832			2143			6871761			6705	7379	38992	47790
263	16915				38640	2120	5328				4389	36039	868047	20788	30739		10000000		30821		29231		193277		15908	28886	64783	4398	40461	2288	966112	8453	3333	2345	6245	1363	22343			2893			73823			5135	8127	104506	24538
264	374684				8323	2277	4936				3411	237500	276123	37211	148340		6893		47118		2898		100311		11986	42080	155942	1696	7800	4655	89013	10000000	1464	7887	1506	3171	13078			6121			2243269			23918	1682	43851	3373
265	152562				45119	4538	1748				11112	490155	24147	9669	24107		3915		27444		19463		94916		16693	13008	77485	1229	9673	13984	434120	5367	13064	5311	1244	51918	14008			6238			7490202			11969	7871	85878	36855
266	81196				56111	2964	7268				2105	10850	146936	42357	167078		8384		34589		42822		33044		18664	22754	83255	16317	20441	9382	514985	8553	7491	3377	2769	187022	10192			2734			7785822			7116	17610	49975	4877
267	17905				8472	3747	5559				2795	438421	45789	97388	62468		7378		18812		43355		144588		16246	81442	18388	2584	7133	2811	21889	9464	3194	2125	2681	27847	34876			2364			4714352			2878	5718	34419	2090
268	25013				2314	3650	2562				2600	175823	514052	75257	118286		27484		45724		3587		62396		15806	10000000	17330	5806	51109	6140	223901	95513	6755	1237	1911	149696	16323			2413			792235			5261	2103	28070	120064
269	9624				38068	3025	1668				3952	211867	680802	110100	32454		22581		9190		11754		31613		23971	41571	96084	15553	60307	9903	139213	6839	4602	2736	2829	19836	52420			1763			6714875			11090	19071	15817	7896
270	46326				40807	3834	2617				1724	260538	1308197	79662	274205		5174		87144		17252		126893		11760	34922	6472	2480	17616	2503	1048085	3664	14498	3538	1407	18468	36779			1733			1308339			9410	3300	15748	253741
271	219566				10230	2396	1441				2486	77002	437409	13078	425110		31974		9375		61414		62513		20844	40199	123285	13630	16480	4970	59910	21211	2437	8231	1302	46480	8643			2481			73291			3719	5735	6668	50562
272	239776				21024	9637	7509				1939	22947	468812	60679	54055		21873		22801		20976		165528		10000000	10000000	24189	9680	8640	13164	59642	18371	4602	1823	1833	5200	53645			1887			3386450			3056	17452	24652	14531
273	39202				36829	1669	2797				11615	385019	37135	42407	55591		2435		43055		5061		122615		10710	37456	42965	4753	15686	4474	196815	10004	2258	1261	1791	14371	13972			1541			305159			8931	4276	78598	46168
274	100507				19512	1493	3129				4597	329699	67655	37323	66422		12497		6375		23717		150699		12499	16860	116352	25021	31688	5350	505630	12256	6817	1808	2194	12435	9683			5626			3599194			4219	5961	99528	7171
275	96307				3072	7149	12026				5068	64527	667142	13523	5981		9245		105120		55121		7349		9656	39041	14890	10040	19872	6738	153998	6299	7013	4417	2153	19199	12892			2820			5421965			2853	21558	62415	30914
276	124149				8118	3099	3800				3941	325626	1897673	46508	21636		1837		44687		1931		196297		58471	29274	114878	4722	14326	6425	134026	13513	2551	2356	1557	43854	4968			4267			1480276			47116	7400	73239	4778
277	35769				30193	3737	1686				3333	58919	211437	53893	142746		34522		59361		18948		124380		22557	21291	10718	6338	3770	3984	21197	106257	5002	1578	1470	58046	27297			3768			7440967			43842	1792	3096	14159
278	81557				14078	4331	15308				3450	129524	243921	78482	38569		8808		13762		38901		52007		18234	12411	97973	41145	7573	9777	199319	5853	3703	2508	3237	66683	36005			2303			50296			9884	9702	9170	1451
279	57349				8678	2555	8171				1482	109808	139739	20643	97715		3109		41778		66676		147054		8787	28148	43171	7006	15630	6021	237167	23627	2082	8245	4220	17150	24110			1587			4186509			11238	2588	3822	25214
280	94544				76701	2171	5330				2754	188907	1073480	15088	193909		34603		21534		18620		6196		14952	17500	57601	24147	29248	10623	205421	50599	2196	2154	1202	34628	10000000			3116			3017142			49299	6172	1773	22824
281	159751				5183	2923	2131				2545	78618	186290	124502	194272		11775		6750		40881		2074		10000000	29778	91716	7434	89252	4073	40920	29221	6466	4704	3402	52720	11923			3382			2267691			7282	9701	63248	5151
282	58206				15805	2216	2830				2056	472297	29014	22845	30203		11254		31166		30953		31273		34730	148582	21219	37184	5752	10272	51701	33924	1939	4544	1229	6793	10877			3120			3245888			11872	2980	9452	57284
283	136712				3837	7601	3382				1750	218083	1409242	123390	8688		6180		29817		135180		27366		15176	90047	13419	5989	36549	4160	128360	20445	2519	1804	2971	3879	30111			2818			4882793			11205	5250	6901	65086
284	116942				11042	3002	8992				4504	19444	126288	33630	39644		5247		2075		11136		96500		16997	50229	5018	5938	135710	3888	285540	33742	4010	1555	4263	6063	19657			1299						21992	2136	64949	96866
285	103833				16159	3015	4158				1958	107353	40066	41802	33476		3726		59267		34090		21943		6520	13644	15917	14187	42181	2220	532593	19746	1471	2506	2055	66881	10860			1847						15068	12604	5652	41552
286	46246				10550	5044	8001				3233	61170	252969	19930	97303		29573		114719		23695		188186		11509	35053	28715	2015	27576	4564	433819	5276	2215	8347	1897	4637	28742			1450						4866	14166	52008	31861
287	26485				53281	1803	5807				7946	52653	108838	54460	34518		18288		30596		31475		76306		18320	28076	80156	2113	16224	3303	591569	52032	3358	2273	2054	78897	6446			2066						53416	17825	47679	9159
288	88221				25469	5449	2405				1951	18085	82961	34481	11086		14811		139158		108762		162283		38404	104889	90360	22897	34418	3264	94753	17746	3654	2098	3094	44224	18450			3551						20931	11142	22755	10995
289	62332				41631	3454	2197				2350	159337	996258	43361	144382		4772		15481		49212		71818		21019	23517	37087	8184	30248	12556	313295	6836	3180	2528	8765	1801	6315			2160						9594	16241	72432	65925
290	9166				8607	1455	2486				2191	4432	584607	26032	98592		18353		11732		30745		13017		16937	47417	98338	1454	16659	11642	162037	25484	2172	3631	4422	19384	21586			3550						2944	5067	2738	27877
291	41357				12916	1613	3931				6107	511723	1134013	14478	104167		20633		2009		22303		138814		29810	17550	27638	42682	37860	4155	168692	59420	1418	2897	1831	58402	49837			1711						10179	24385	34635	34201
292	54911				63955	2302	3471				1982	89875	223267	21500	256823		15208		4898		50412		31881		9706	12619	56378	3367	223466	4449	201640	11450	1936	1328	3612	8687	21484			1352						3811	2159	8504	12128
293	67266				52271	2074	10469				3615	258770	53287	84475	28927		3464		22761		26000		366510		8384	50257	60455	10347	19007	10000000	15095	52229	4920	1926	2530	111860	42847			2344						2294	4618	39502	20628
294	47286				58005	4818	2464				5432	1049638	196647	10642	195691		35142		1652		36354		110951		10476	82589	54692	14341	69855	5578	29649	37261	2304	3878	2147	5004	12644			2377						11159	2844	43501	49986
295	71545				10557	2651	2741				3134	632150	130497	11718	57613		22567		13069		113192		103965		16685	151058	49823	5664	8936	17152	3072	36081	9961	3255	9596	49085	29931			1425						5040	22266	14569	90391
296	141389				44324	3954	3484				1550	725960	322543	10000000	36138		2712		33780		21763		124363		11403	31266	27469	1465	36747	3458	28993	6029	1187	2240	1193	97410	36832			1218						12506	2499	23914	32730
297	22870				17698	2820	3610				5515	450565	440341	6644	96461		3306		23638		27695		20539		10000000	54829	6891	32104	15262	3159	391649	5246	4482	2446	4050	156738	18607			1878						5931	31362	35216	66819
298	28329				21027	3100	4757				4654	67630	1129286	45884	24550		4554		18839		6892		159090		9470	14153	24783	15549	71938	9540	605259	12099	7461	6994	3306	3281	13239			2061						3528	5419	119573	12656
299	13985				47718	1813	2321				2531	294084	46820	11869	1902		4690		19347		15392		156094		9494	17115	59663	4687	1791	4240	493626	3622	2672	2291	6935	55558	12370			4063						15445	4322	29944	40716
300	302949				17522	3557	8967				7054	690412	50727	20134	120782		9681		1934		12893		417336		21766	42757	76046	19357	59488	11558	39668	23333	1486	1701	1241	48410	11499			1337						2286	1627	15432	14795
301	3287				8736	2132	8339				5585	256661	192371	28771	118358		6456		1241		32990		131522		27739	17872	18513	6925	48673	2457	10497	22364	7150	4252	2901	27005	6810326			1772						4571	8955	2361	32377
302	41382				28942	2827	11052				3552	799252	90255	23119	41661		10000000		10872		51874		196716		21258	35221	90419	5624	10668	3460	172750	12467	6272	4576	1678	96366	6475			1175						30984	17328	46943	20035
303	88372				27637	4778	1722				4690	117513	117889	24919	13496		10000000		23197		14741		62061		11883	83170	113591	5464	19310	4755	184694	9648	10012	1866	7108	24162	27024			1366						12987	24322	2039	79627
304	163249				34069	3585	6466				7970	156601	317205	8211	18193		8801		41155		3762		61249		32702	43140	33896	10662	50810	3868	119418	51416	4445	1658	4607	19274	11449			4375						3296	2433	16514	25974
305	66777				65361	2372	23715				4091	252780	645487	35926	21624		4742		18284		10622		25799		6626	11909	21455	6906	17500	11693	596678	4398	11585	3175	4676	3589	3317564			2702						48492	21101	1993	23934
306	147991				35378	2061	5643				8548	129283	171160	18249	339160		5948		46145		63359		161738		16032	20531	89993	3204	50396	4747	269492	6289	5583	1766	1831	1460	23052			2762						6304	2226	16226	52523
307	222808				36901	1775	5281				3897	123312	222857	38306	12272		12999		37977		41919		103268		14916	55300	41174	7994	41484	5597	51565	23617	1428	2446	1349	16262	18972			1447						47133	6541	319326	24468
308	365884				58762	1618	3938				2924	118258	141275	29113	136900		10000000		7265		10748		28109		14801	46556	24236	2238	4052	6138	187627	6630	11663	4282	2846	103723	30157			1386						11056	2778	4759	179075
309	69594				16093	2863	1937				2478	511280	183039	7855	86405		4206		19488		22005		4443		21902	46658	121095	20108	22588	5608	369971	10000000	6708	2958	1839	24108	36600			3214						27613	10367	43153	68053
310	45532				34043	2498	3096				2097	27112	114916	15535	181879		6733		45130		6769		10394		16752	18268	6153	1579	38768	5155	118703	6721	6191	2711	1980	16264	28030			2387						12315	3386	14581	23393
311	175724				27093	3083	2699				2121	61812	636488	20547	107147		14119		1456		20629		17079		9819	14545	177306	48705	81406	6116	267086	40412	2212	1702	2263	5423	6980			2391						6170	8715	37184	36100
312	160647				23189	6735	3237				8650	4946	156585	26127	43523		3732		107476		14908		88836		65778	168726	60094	3067	29065	5192	610980	40158	6080	4954	2088	56382	8254			2658						13558	28508	14013	20992
313	219654				95046	2455	14012				1447	466432	277562	37044	13072		29767		12604		14762		44597		11790	10000000	151056	47586	20197	3151	243121	10000000	12400	4970	1892	20295	21103			3351						11445	8654	10362	5111
314	25525				13330	1718	2605				5968	418488	626884	24488	95821		10000000		79945		91354		64835		34445	33495	29078	7008	62051	5736	59353	66705	4979	1370	1316	9056	66431			2064						13952	2242	94419	1615
315	179793				54306	2166	6319				3552	635060	164683	20986	277680		12240		19575		12801		309560		15759	40147	21686	17975	23248	3742	608379	32745	3163	2591	1623	33781	8136			1359						21768	4301	65522	32009
316	116978				23759	5407	1812				2382	910554	189277	17023	35848		10000000		59702		35153		147375		17975	32295	54755	38149	13919	17271	167870	24188	9755	4021	1886	73458	10000000			2186						24651	22491	11962	8561
317	29901				10745	1944	4791				2637	67099	1255625	42408	63056		5913		38609		21180		164750		37773	22790	25590	26323	54026	8141	8996	17468	1808	6827	1415	49665	13159			2417						27956	4330	5333	26799
318	119109				6973	2469	1683				5615	61574	22427	53501	8874		6397		56272		33303		74504		18773	9199	40491	30267	39662	10000000	183927	9488	1808	5668	2089	33656	10000000			1368						5263	11195	55163	9508
319	125522				43074	4063	1953				4690	321281	279250	34156	20243		21293		69868		3384		43283		56255	10000000	9608	7120	12402	2018	46479	18010	1513	1351	2398	45926	10000000			1930						13327	21028	70231	5691
320	60936				13897	1961	5134				4509	342362	13110	85654	19444		12898		80364		66924		19063		24863	10442	32199	1456	40821	5048	38038	19652	5970	2149	1745	27433	48832			1694						21233	23158	66584	67147
321	10032				69112	2318	5870				1561	65741	333038	21631	170200		2749		13361		20947		338395		17442	63253	160101	8704	21285	4618	70407	16056	1530	2444	2098	22919	24949			1404						5184	23335	90707	63945
322	168324				12150	1679	11521				8276	884338	54122	12726	65861		4511		23427		12649		128294		19406	21413	2251	7943	9051	9525	281842	29571	1626	3860	6515	1311	44043			1517						4781	3209	112023	17925
323	31311				6209	3184	2479				3413	17864	1130807	33645	47537		17682		51399		24253		10133		10000000	11182	101784	29318	34298	5289	354586	14739	2250	5154	1777	64481	10000000			3303						1915	22253	42717	2991
324	75773				8347	11440	6720				4054	5635	68722	43594	252078		42337		136664		7329		51328		15124	13859	12472	8025	25971	3442	55462	32361	1551	1448	2132	81300	9546			2286						2082	2003	33373	5008
325	51608				19370	5580	7881				2085	202218	430639	22930	175712		12862		100277		98476		79213		25017	46928	24668	29000	6166	3860	96942	30463	4073	2131	3627	8908	27593			1365						36016	5247	126927	69229
326	143136				4017	1980	3918				2456	90889	203830	7299	29512		12887		37645		13585		78625		13114	80303	149046	14776	40238	8166	575829	15798	1363	5034	2116	7052	21516			6662						6684	3029	112479	9803
327	1465				41128	3981	5666				1872	40113	63040	20608	200950		12309		2196		4335		19871		23273	36819	7695	9125	10915	4095	250920	29663	1155	2471	2364	39720	14996			1973						12957	17690	52175	103436
328	4229				64889	3379	7606				1604	109195	198285	33135	121354		35980		18329		6996		2415		35246	90397	1577	7209	58986	5466	157550	11336	1291	4103	1187	184717	16651			1261						25053	7768	3601	29922
329	46891				82947	2523	5210				2284	441332	106096	12807	412326		11817		2432		65496		6781		11947	36626	63215	21252	40700	2848	119752	19621	2292	5250	3111	9446	3211			4443						30641	2794	12311	34261
330	35998				45457	3886	3691				1642	6672	262648	21451	88228		5471		10526		6890		17425		7379	16293	15881	35270	28409	9166	11317	11416	2072	2826	2192	8945	6801			1297						2886	9652	7006	38643
331	62100				18326	2839	2003				1576	97462	405243	37811	102941		8011		22812		4715		20293		18323	43684	109902	7855	2421	3469	7760	101708	14308	5584	1532	79210	40148			1907						11614	3181	34136	45340
332	97149				3575	3573	5152				1833	109326	1393935	13387	42142		10000000		22515		11307		42414		4164	20404	68084	15973	22337	11537	953499	6935	2194	4076	1723	28130	17419			3353						51292	6116	8560	36860
333	78239				6473	3135	1797				1816	542119	198263	60230	40800		7744		9193		8970		12505		10000000	9976	147158	5607	168794	4677	590111	7371	1214	1587	1421	58085	47071			1563						16673	3636	5057	6742
334	33100				55792	3178	2893				5002	89612	300919	19775	55978		27465		38484		8380		40372		25730	31290	17681	28072	22084	2966	467931	19383	1617	4802	4611	75913	7691			2051						28044	16420	42884	11793
335	14413				20505	2727	1970				3618	18651	696584	27494	103153		52987		10053		48790		182806		10000000	10000000	16040	12619	76496	7412	141492	57286	11007	2062	1280	41075	22544			3297						2644	3106	25280	52327
336	11274				49176	2729	8437				2816	63982	343502	22899	216914		6798		35496		37439		40459		20407	43207	6883	23568	59999	3337	101929	3224	1833	2931	2551	83343	20502			2511						6540	5377	2993	1741
337	74734				34580	1617	3276				2358	241069	496922	24827	126270		14317		2110		2274		45878		5129	70650	2371	11054	14159	2536	344902	48556	9235	4780	2325	85514	62273			2613						16630	3993	28274	47377
338	57719				59016	2284	4304				8637	239447	94435	32733	104504		3746		72557		1409		203624		7444	15394	38661	17128	35593	2837	301215	6187	3590	2066	3978	76512	9530			1959						5841	2789	37794	25940
339	55621				11275	2293	2709				4697	65644	57548	38143	58517		17777		99919		5425		22526		10110	37045	63539	5287	24096	3197	3908	169114	1490	2183	1402	45820	9154			2010						16353	4762	64124	82252
340	7657				14013	2035	9453				4744	541137	1068280	32329	50102		4235		62660		10881		19172		23889	57933	62849	4032	53801	11986	240366	13150	11751	2660	1422	4753	19990			5369						11578	27559	73236	16262
341	10887				13887	5099	9717				3167	81807	164265	23577	65797		13791		3827		23432		50098		36463	77923	7380	2623	10910	6394	23650	7521	3065	1585	2343	49049	10000000			2448						37589	1705	28201	74360
342	71954				1944	2125	2659				3241	104038	1079947	22873	105464		2739		8408		8427		59274		10223	65450	68725	8970	28296	6065	193999	96969	2193	1374	1325	113008	10488			3318						9554	10128	155330	36158
343	36141				46344	3066	3583				8751	91046	1001835	38330	482108		9823		50585		13282		43511		7442	33462	28459	13003	5768	2921	193455	83642	6843	3109	1467	19155	20761			3320						4529	3568	164074	3433
344	1795				3426	7461	1468				4638	734014	286132	30402	142394		10000000		30207		18457		260121		41748	31237	28411	9072	20917	2335	282273	57709	6905	2594	5149	32538	15678			6037						11252	24923	15854	51271
345	21694				54731	4122	2507				6636	229616	325326	21406	61268		55949		57498		37068		10965		15790	29422	27431	15634	8550	10000000	579832	21487	1414	2079	4507	34841	19673			1564						9270	18129	4458	59215
346	122762				5925	2396	3131				6202	276585	1243021	34804	108254		16314		39681		50017		114955		19824	37007	83691	2889	16122	3286	1909	4946	1474	1850	1776	7194	5115			1886						10417	11718	2531	28189
347	248036				14714	1468	1809				3982	309266	443546	16745	47695		10000000		6398		45595		79540		7429	32130	127906	2889	19264	6363	199047		8033	1599	2803	7217	10000000			1312						5087	8167	13385	25903
348	170465				1357	5956	5757				2001	302010	2037	30314	60152		3418		36288		5925		143250		12025	45209	2859	4160	98521	1990	231189		2602	1934	3609	179834	10477			2727						8697	30291	6596	28268
349	74732				90427	5320	1826				6716	232996	106484	55854	140464		18234		144373		22502		113799		27307	33551	5440	15019	6536	2268	300195		1579	1705	1858	34335	15182			4870						46726	3192	50331	38489
350	116626				80924	2557	3745				2030	97366	21949	25560	75611		8829		164711		54462		57811		35619	30726	47359	4494	17515	3967	569651		7287	2950	2386	59229	22883			2890						10835	10048	17963	14939
351	31326				19892	4047	2158				2209	194294	658553	14055	3951		30672		85414		11364		44668		19584	25775	194585	12165	48816	5861	946672		11220	4074	1615	94967	10477			1675						9599	13604	41683	120810
352	47605				21838	2828	4928				1856	8170	389237	58840	11693		3934		8246		48673		37118		23231	28199	3765	10414	20272	4023	293883		4310	2306	5719	158235	8393			4020						8158	25092	166230	5159
353	34547				19622	3949	3863				6013	721462	144298	25212	401783		3618		66556		14772		308946		17996	63497	28169	14013	4237	3819	560261		13673	2185	2845	154111	24808			1209						16005	22972	49503	38370
354	312098				51281	3171	4654				5825	627404	601800	35961	125693		3178		11766		50195		62937		9725	108820	2857	9139	22213	3288	300533		2848	3135	3135	5827	26587			2771						8125	33029	44449	2504
355	51379				28228	2245	2943				2486	320537	112632	21077	141646		32863		94964		17020		9883		25262	30767	38708	26755	22147	4551	212859		8928	2088	1260	41849	77178			3550						3386	2322	111562	34239
356	13877				6240	3380	6686				5325	25568	295950	17242	89012		2125		18044		2733		171228		21741	19091	51331	25636	15683	6857	239839		1269	3369	3193	14066	20134			2608						2292	4681	34359	4529
357	169341				25899	3933	2303				11036	78891	365985	18214	219552		151526		84999		9027		12891		13206	37386	264854	23154	111448	9730	92646		1725	1717	3522	7306	37154			1454						32034	1582	130761	2978
358	55844				24826	4826	7007				4950	355997	553620	47018	227184		2310		13490		4715		63051		50252	11261	10700	3412	3147	1878	18788		3962	4445	1340	1897	10000000			3038						35720	54780	16984	47216
359	110648				6756	4201	2208				4723	4875	560581	88181	124799		9275		10085		1897		107629		12752	24620	18105	1431	31166	3884	281767		11746	4063	3492	85231	16181			3167						26302	58857	6787	110528
360	3199				4052	4105	1569				1896	581063	40671	20043	30670		13345		43132		48794		106350		19250	26467	21670	20690	8962	8511	975690		11448	4525	4115	102259	8984			1595						11884	6817	84533	63049
361	7747				52642	3831	2087				2923	69935	1085808	50618	105821		4436		63766		31312		19733		23645	87136	7840	10875	13904	5099	927221		1967	2506	3964	66846	26784			1417						12527	12870	21325	106290
362	101398				6534	9987	2339				1862	311365	23915	65196	41434		14514		15880		1351		217162		14829	88702	28510	18536	8041	3244	505196		4605	1723	1359	22531	14740			2064						10271	7379	53158	54004
363	122573				38640	1994	5328				9902	161851	25102	21703	78615		10000000		14337		36153		133273		10000000	37596	57492	12468	56297	5960	150148		1745	2858	6245	39965	28888			4266						5876	8127	6991	47494
364	95167				8323	2391	4936				1929	303827	668923	58961	35421		4273		24636		36393		129066		10000000	56551	40764	51814	36358	2745	204448		6292	4980	1506	52620	9790			2580						31108	1682	37300	64192
365	18296				45119	4571	1748				2719	102104	217886	37896	8230		15828		75920		2957		28221		7401	89737	255089	1752	12520	4021	67909		18074	5775	1244	17797	36499			2923						40269	7871	71414	43874
366	180263				56111	1668	7268				3628	44172	48117	10000000	68672		25242		136024		11691		46231		36731	59768	136990	1811	21507	5452	176449		3555	5418	2769	55514	33102			1606						3071	17610	6220	13635
367	256819				8472	3782	5559				4074	112723	384561	28548	154325		10000000		18447		42259		84261		1423	106051	12404	15619	58554	4224	18930		10004	4272	2681	11753	13276			1316						11092	5718	41095	16885
368	27695				2314	3150	2562				7108	5225	463462	19860	66153		5207		1774		20560		252938		23409	30384	18934	12620	185130	5479	162896		6933	2458	1911	14139	10000000			2918						19149	2103	54239	12761
369	17867				38068	5296	1668				5702	47743	571148	22183	66740		10000000		24582		51615		140386		13920	23273	21862	6222	86384	10264	35168		3084	2516	2829	26445	283084			3085						5576	19071	63473	25459
370	13562				40807	2062	2617				2457	8481	487605	39364	72432		3551		39745		78662		26725		16701	47777	59979	7661	74524	7031	39817		1403	5820	1407	168696	13672			2155						16400	3300	44970	4032
371	156837				10230	6259	1441				5126	379198	62081	32668	7399		6648		22249		5975		54322		9290	56134	23153	26375	33088	8818	388615		4584	1904	1302	24237	12188			2164						58991	5735	67696	23305
372	60889				21024	2465	7509				1762	50679	468391	58717	87298		8929		47504		15975		4094		9629	72539	157908	37632	36766	2240	45131		10578	2433	1833	4200	5036			3233						18573	17452	46192	7718
373	5322				36829	3079	2797				2682	159084	306009	27409	246168		1890		26153		26744		165506		10374	40999	9342	22299	67101	2823	39062		5621	2896	1791	121098	22898			1306						19560	4276	75593	11329
374	72510				19512	3056	3129				2557	160446	1604342	31993	5040		2865		39906		7891		142458		34416	65590	42581	31836	85030	7017	68166		4452	3268	2194	48510	17285			1913						1790	5961	19938	9289
375	30546				3072	2605	12026				2573	12413	72012	17769	56115		6255		12598		41329		22021		15358	18858	13305	10917	20293	4033	438031		8957	2459	2153	51393	20693			3554						9436	21558	186237	8569
376	5224				8118	2625	3800				3815	140374	494898	54130	349653		3061		128693		11669		39476		8436	47219	12159	6683	72269	14923	256823		1457	1913	1557	4107	8850			1822						7970	7400	2333	48257
377	46351				30193	4591	1686				2149	292982	238827	29925	90027		2617		12728		2733		9542		17978	47986	22854	3233	3073	12318	15534		4926	2927	1470	13488	10000000			1251						22382	1792	12735	66443
378	34167				14078	2531	15308				4666	127221	15288	12866	138494		9297		35390		6518		89856		13246	22137	62129	2994	16532	8778	143660		3034	5311	3237	132281	22193			2255						4556	9702	104830	4839
379	83201				8678	3979	8171				2818	132011	165541	87242	159598		3664		80265		54124		164419		38996	23598	4600	17907	37974	7584	162338		1965	1799	4220	10000000	9315			4056						6092	2588	69219	8680
380	7661				76701	3263	5330				2170	120341	239712	9757	232496		3950		177993		38588		2466		24431	27898	6917	21293	26261	5906	182434		2427	12218	1202	37424	9498			1395						21118	6172	28121	111590
381	213655				5183	9839	2131				1972	114737	609791	21832	55889		27554		45089		7061		30782		18977	94433	2471	7665	41997	3752	292019		20654	2381	3402	26329	20112			3290						14730	9701	50186	41318
382	286085				15805	2558	2830				6781	201046	398830	10000000	5918		10533		24590		20005		201904		14046	72453	12980	4675	66423	4973	124285		7143	2610	1229	59663	10019			1583						1554	2980	13150	32152
383	53528				3837	3214	3382				2199	26475	160822	43988	200767		2719		58637		2001		28934		8209	34652	197448	1721	54422	4463	15920		5943	4197	2971	21420	25672			3289						12310	5250	31141	34034
384	36153				11042	2514	8992				6411	26734	464479	50926	52456		8684		159471		55929		191458		22695	8579	52335	15572	1889	14119	18643		2635	3008	4263	91264	12039			1444						26023	2136	66666	13996
385	62006				16159	3101	4158				2301	256419	67619	21629	35339		5849		9145		9457		21651		51742	30665	26036	5139	21345	3359	208358		18470	2462	2055	14868	22895			3527						3736	12604	45662	10259
386	46580				10550	2750	8001				7925	333885	23695	42650	53849		10000000		20564		19337		139236		17419	30970	2682	31313	29896	7408	163484		8275	2003	1897	83633	10000000			1694						21624	14166	84393	67210
387	90102				53281	3978	5807				3726	453439	371630	28422	116973		48587		75986		88062		43374		18954	22458	57182	26551	2300	6858	322251		2132	1523	2054	52955	28413			1694						5221	17825	31497	51818
388	40206				25469	3963	2405				3318	164906	203525	15431	54019		3249		127370		14772		18186		23199	31635	19067	6974	20923	2290	289232		3453	1985	3094	5119	10000000			2722						15222	11142	27146	27901
389	8052				41631	6541	2197				2103	30703	526323	17667	83344		29866		14320		36898		309535		15753	64486	4591	4503	8848	5639	871568		1482	2909	8765	82514	14717			3161						4717	16241	12730	75231
390	25075				8607	1631	2486				3269	98987	1382358	18447	223858		17971		12246		20463		29989		22522	10000000	27580	32622	21994	9021	166836		5647	3781	4422	23017	7267			2164						9792	5067	45374	21453
391	196110				12916	2863	3931				2046	61192	286951	13864	149895		25252		109757		37633		34330		16617	45418	25872	30245	5028	3588	272301		1617	2604	1831	56217	14828			8477						2889	24385	45049	43447
392	93706				63955	6755	3471				2137	34791	18311	32456	89424		9727		110983		2684		14740		21762	38390	92702	4718	16568	24046	42821		2182	1442	3612	18515	26009			3116						10019	2159	5904	1473
393	29116				52271	1507	10469				2501	4398	1097125	10875	45581		5098		28844		39786		105301		13312	13754	139390	12564	43167	8557	386770		7134	2812	2530	58752	42022			1399						24484	4618	2071	83732
394	63937				58005	4497	2464				2250	65143	222996	16858	44111		10055		11913		11015		46916		41332	18232	34033	1601	48078	11886	498777		3279	2982	2147	84814	14424			1697						26425	2844	12795	56409
395	14359				10557	3650	2741				7470	281073	121533	27862	64450		1938		107339		12239		64872		42234	29292	4367	6847	15395	8146	138338		1484	3093	9596	4653	33408			1374						14396	22266	3729	67794
396	7811				44324	11176	3484				9464	11172	687846	44185	23977		2013		80130		3164		78542		13801	32279	38634	23261	12483	7000	600362		2176	2486	1193	137151	39745			1823						1284	2499	40679	141087
397	186576				17698	3767	3610				4864	436643	95121	148706	212848		3928		2804		10297		8929		20735	14874	12008	19197	45637	4827	634498		6742	3924	4050	73465	18261			1734						1343	31362	9527	49399
398	14590				21027	4507	4757				5183	189364	679850	26518	179513		10000000		49576		41925		192386		7487	20281	9800	15748	8421	5210	446039		2267	1792	3306	48781	8327			1253						3271	5419	28882	26980
399	11951				47718	4517	2321				4650	138047	150223	7320	230947		30735		1316		27494		145564		31589	22814	13745	2100	91608	3323	235390		4915	2927	6935	34265	12098			1738						14250	4322	27053	6792
400	66858				17522	3181	8967				1605	30956	1110487	34014	27032		9996		87255		54028		70247		6101	29605	47520	10820	153823	6639	875549		3784	2850	1241	9297	7740			5505						17487	1627	73922	82795
401	17067				77668	2132	2122				3853	101717	336108	19523	120829		16072		1230		6853		6269		27739	47087	14199	11315	81265	3311	342467		1304	5273	2039	12241	5067			1743						4571	33208	2361	69689
402	93495				8255	2827	11879				5361	260348	107199	59200	38807		10462		23481		18900		14876		21258	10000000	284124	7466	23269	6557	960074		5433	1692	3945	34248	17278			1833						30984	3889	46943	85480
403	49035				60312	4778	2226				7830	23805	578978	25608	27460		9094		45242		36098		34727		11883	81600	22675	18925	1794	9370	7522		2525	2569	2453	17622	16331			1292						12987	3343	2039	35802
404	90693				10028	3585	3056				2085	182716	30438	45695	62382		29110		39174		21473		33738		32702	22915	26121	17790	17613	3638	145102		4858	3479	1684	50910	13687			1362						3296	15521	16514	2651
405	39216				19398	2372	9061				2177	825881	1081839	20074	4777		4489		23505		11896		39468		6626	33744	24109	2913	30709	16909	51814		2364	1830	1412	46522	19691			3024						48492	5348	1993	41173
406	80457				26612	2061	5532				3984	233692	341375	16688	885677		15399		105992		28087		118611		16032	24320	44088	5041	21162	8278	95600		1120	2590	4859	69810	18261			4860						6304	18780	16226	142650
407	164972				28087	1775	3679				3394	69557	191342	10000000	54377		8300		14467		22582		36190		14916	22975	1318	20477	8124	27276	19125		1540	1790	3709	12119	22387			2340						47133	2954	319326	46227
408	267821				43355	1618	2363				5309	691984	475795	10000000	49530		28358		38524		35371		62313		14801	48963	126103	5893	25093	4951	369458		2399	2578	1135	31272	26040			2423						11056	7859	4759	1707
409	223796				21573	2863	4484				2947	99454	219660	42898	61849		6317		28492		12588		63190		21902	30857	21008	7315	58722	4775	79878		2135	3291	3689	4773	14551			5040						27613	2476	43153	75280
410	130841				7604	2498	3855				3347	178069	35213	32448	17125		4290		102909		15970		3307		16752	773795	48922	16874	10665	7776	89159		2236	6139	2631	47179	16895			4114						12315	4019	14581	60702
411	180131				14191	3083	4388				3886	262529	875146	30392	44991		3185		56659		10769		26550		9819	10000000	32831	8910	29177	13285	255105		1168	2485	1589	37035	29916			1891						6170	13992	37184	45380
412	16572				18285	6735	1604				5713	15486	1288085	17693	99711		11368		10613		1145		84707		65778	44333	24991	5749	18719	2867	180242		5939	1397	1267	173143	15299			2004						13558	4386	14013	10554
413	28014				6034	2455	2955				6253	657071	318305	81751	187835		9547		194690		42013		296457		11790	68956	9142	3913	11100	3979	654174		3331	1801	3548	61530	12897			1915						11445	16252	10362	28428
414	64664				16674	1718	3632				4638	11965	462224	29303	42069		8995		13553		17070		24671		34445	15514	72045	17786	58660	5373	17443		2151	1900	2475	8058	32584			2656						13952	4869	94419	141646
415	84495				46000	2166	2473				1896	198042	119048	30431	41691		44100		47655		52753		90524		15759	36848	25431	16320	95153	2371	186684		1621	5840	4221	17813	26342			3717						21768	12605	65522	30633
416	48573				28530	5407	2921				3288	229993	37500	32435	14894		6206		11518		50217		169046		17975	36955	88616	13675	1743	10687	145089		6152	1965	2720	13720	11258			12573						24651	41818	11962	5240
417	171911				14177	1944	6889				1636	245889	14252	30875	83876		4805		3028		34226		54122		37773	66879	5182	14443	16614	9113	23965		6737	1801	1845	21028	10000000			1420						27956	34078	5333	2728
418	36318				6067	2469	1389				9040	113575	273035	68981	30154		11384		14048		51177		129003		18773	65902	60439	4832	24242	3311	74758		2487	3013	1499	11802	19501			2128						5263	6654	55163	20995
419	131948				12377	4063	3811				5350	33443	998952	17860	82603		10000000		10011		7961		164469		56255	11521	128143	19008	49081	2666	62336		3464	3603	3088	26824	56589			2271						13327	2994	70231	5337
420	8872				108947	1961	2335				3982	114470	324113	41490	110141		25500		15483		17050		74119		24863	48705	16159	19355	19132	3442	293086		6586	1955	1365	32104	14684			3405						21233	2713	66584	12591
421	71377				48304	2318	3626				2607	269225	784673	14067	161687		9686		87258		17814		41847		17442	18693	44614	27640	17471	2942	204563		4437	3270	3113	5235	17192			2689						5184	16807	90707	32731
422	6266				7711	1679	2146				2583	112497	88067	17483	272394		29872		46532		59005		225535		19406	10605	11741	17579	35009	2602	281570		1567	5214	1298	69990	10000000			2059						4781	11546	112023	82557
423	272577				66079	3184	2444				3270	158171	385468	69813	14570		2218		29153		26463		51923		10000000	28655	22541	4129	8796	9362	895218		6440	1952	2582	117301	20407			2057						1915	2226	42717	54474
424	9825				63589	11440	8011				3248	236469	90568	27187	134539		59896		93082		32104		137960		15124	71043	19256	24034	10499	5100	102956		9775	1798	1638	8130	11353			3776						2082	21458	33373	48173
425	73719				2287	5580	7119				1754	51525	224610	43326	30569		5946		56071		47993		41534		25017	31395	7169	8232	15223	4940	51633		7148	2273	1655	7385	12715			1324						36016	2900	126927	4575
426	46684				39479	1980	4167				1902	160781	236255	91523	50135		10000000		18557		3152		347557		13114	45916	13787	1811	9360	9383	26448		3713	6969	1831	8039	21932			1262						6684	8144	112479	19058
427	10794				68074	3981	3789				1878	235694	165699	11351	39568		2731		36046		4204		58943		23273	50156	23439	48817	37768	1986	93599		3947	1394	1489	19693	21489			7950						12957	5213	52175	29546
428	2363				39507	3379	7686				1691	193272	281197	12561	87973		14223		37944		2815		26501		35246	69694	13889	12828	35428	2061	147763		3344	2799	1994	28648	35946			2916						25053	9527	3601	70114
429	21669				32540	2523	3988				3724	129681	161543	109607	1885		6896		41210		32962		21301		11947	25227	28729	2793	3735	10000000	192322		10635	7509	1736	36238	6582			7450						30641	6838	12311	32275
430	18981				38946	3886	14440				2356	87549	916078	36488	186533		17627		42975		9702		108953		7379	59685	5633	2476	131263	3446	168248		16001	3812	1282	97960	13470			3957						2886	26125	7006	20852
431	190825				51178	2839	2234				5747	4097	101508	27084	96065		14464		23240		12367		55982		18323	39059	71720	11831	61740	4479	130972		4180	1906	2069	56921	6039			2217						11614	20399	34136	14806
432	93425				30103	3573	1625				9389	34674	87371	32470	201988		10000000		54142		2191		159687		4164	11953	16084	3925	27851	3479	108857		3993	4045	3206	54718	20113			3102						51292	6249	8560	18208
433	266285				35982	3135	2452				4865	316708	3428	77729	9773		16522		113203		28229		74616		10000000	17979	88817	58767	46571	3171	369111		1485	2297	2823	75777	10000000			1789						16673	13526	5057	22927
434	46983				8139	3178	2675				3526	31204	1988	21604	14026		4092		26171		10891		52324		25730	26697	44077	13436	28508	2747	309924		4666	2888	2707	78326	16698			1318						28044	41047	42884	48494
435	80906				31182	2727	8057				2221	273820	122125	33984	133308		1636		11774		39439		48031		10000000	43818	74001	5732	7938	8742	170570		3536	7456	1994	3537	42278			4630						2644	1750	25280	5637
436	53453				34185	2729	7301				2261	160300	61671	36229	216433		10000000		11091		22108		19022		20407	13181	29244	16916	51207	6521	104800		8671	1669	7896	2450	17344			1584						6540	7698	2993	17424
437	98232				2884	1617	5160				7878	142183	672487	30377	192437		2920		19262		1331		392073		5129	9022	213791	11284	3199	7660	121102		3652	1723	2300	43829	30982			4451						16630	16291	28274	23456
438	289974				5552	2284	1546				2126	126811	139081	24955	22713		12315		91366		12493		84705		7444	31111	12071	29668	15845	3422	36233		9179	2083	3070	84197	82301			1302						5841	10698	37794	54375
439	22123				10865	2293	4673				1532	217335	56273	20599	145620		1828		8511		34771		38928		10110	15565	31729	6156	20078	4190	771808		1912	2018	1916	4345	9105			2142						16353	22598	64124	73020
440	36348				19956	2035	2317				1939	381773	253455	19361	114419		11853		22826		12394		26939		23889	10000000	147159	14260	110767	3899	25912		2180	1963	1363	11745	81668			1880						11578	17637	73236	32267
441	162005				10056	5099	1764				3106	31183	895131	65534	106466		13763		17642		23978		59741		36463	47714	29762	29050	89351	3609	340197		3691	2828	2711	113805	24693			1528						37589	7800	28201	23276
442	18483				40849	2125	2991				1918	55586	66884	10000000	54464		26932		28851		3672		24145		10223	63011	227977	17124	30717	5026	758280		10112	2453	3691	60050	20444			1631						9554	2751	155330	14996
443	84833				15057	3066	2403				5232	6954	349440	30764	7435		9070		13061		13061		374717		7442	29153	5598	12339	7957	2768	235468		2663	2224	1434	32117	15619			5645						4529	13055	164074	18064
444	7441				45797	7461	2018				6513	234395	420132	60396	152913		16019		14538		62158		32955		41748	34008	281670	2399	33511	26270	192012		10430	3053	2059	15181	7513			1208						11252	16920	15854	8514
445	76477				43097	4122	7159				2176	42691	150499	8424	200029		14826		35265		17477		113424		15790	41312	141397	2362	3280	12577	193743		20120	2531	2657	63255	7302			1826						9270	10899	4458	57147
446	93359				77492	2396	3545				2049	511838	635247	25493	59487		47663		41375		5045		22409		19824	17855	26379	14239	46000	3202	22509		1531	5759	1357	75190	20884			2401						10417	3867	2531	18784
447	8927				8908	1468	2286				8381	591113	993956	16493	268253		10000000		14294		42184		118933		7429	32605	29820	25044	16933	6281	91184		2215	2652	1363	21096	42930			2204						5087	13351	13385	6890
448	69520				27050	5956	2832				4395	98628	30196	35502	116447		7041		89248		11019		168719		12025	2216089	61875	4872	9106	7020	72814		2357	2654	3132	40164	23686			2249						8697	13027	6596	73024
449	103672				7522	5320	7220				6666	238812	1085049	27290	7006		8881		16866		107802		181455		27307	13114	79673	20884	71309	4276	44418		6036	2466	1708	91972	13809			1625						46726	7983	50331	52986
450	54824				85035	2557	2069				4436	117742	212349	13859	86064		31249		3974		15693		332314		35619	84898	23928	12110	3386	3021	43576		3041	2804	1730	78964	24980			5965						10835	12390	17963	36326
451	104087				19258	4047	3102				1734	15189	46992	10000000	52766		27978		149732		4085		421004		19584	48482	8875	3754	71901	5685	31087		2094	2087	3041	31683	15310			8292						9599	14041	41683	34132
452	17891				12623	2828	2658				2110	205242	393354	46839	145480		7721		156478		1977		30109		23231	19326	3653	17909	19684	9550	730801		1696	5466	1435	11530	10604			1354						8158	17858	166230	77468
453	44251				16321	3949	1495				2931	144160	478229	63614	12411		3975		123981		5406		42928		17996	68996	40874	2415	3333	10000000	5972		1732	1582	2053	5950	7061			1698						16005	24845	49503	11947
454	21158				2861	3171	8652				5250	107946	726749	67707	80067		8660		95513		4222		6897		9725	46652	34549	8011	12691	8845	182178		3962	3460	5114	21578	27232			1798						8125	2813	44449	132844
455	130736				6084	2245	2348				8439	302035	53360	17340	20888		34945		87989		50848		20976		25262	33950	27157	17294	10438	3156	468227		9737	2668	2109	52216	16050			1427						3386	4839	111562	22685
456	146327				35154	3380	2349				3467	366478	392580	37080	196371		9217		32050		69862		84831		21741	19350	210787	27625	17791	8125	160796		2219	2190	6726	23022	7026			1434						2292	23762	34359	8482
457	38394				73611	3933	7441				1652	33079	274266	13139	116556		8187		7585		8928		98053		13206	70379	6077	14090	9253	9250	380938		3859	2567	1946	41150	10000000			2178						32034	10819	130761	2539
458	74341				20344	4826	2828				4876	220818	649262	59559	54370		9168		81164		1260		43842		50252	31244	25154	22366	20291	5804	271675		8195	1436	3518	16204	7369			1556						35720	3087	16984	29140
459	9608				59670	4201	3459				2281	79514	152815	106351	153555		2177		6024		9947		31217		12752	15639	43820	13824	108978	9762	4184		5344	9053	4870	50286	56067			8187						26302	25182	6787	92686
460	311860				56404	4105	1843				5139	16573	513785	22555	96210		2952		25958		5509		179634		19250	38724	58131	18909	50975	6613	159639		1407	2418	2372	201566	9094			2829						11884	12207	84533	53171
461	8214				34209	3831	1457				9551	255688	609838	11263	178470		9719		16964		3416		101265		23645	60481	9785	29930	16175	14161	24227		2958	2721	1264	47617	15701			2102						12527	3998	21325	44900
462	34374				85933	9987	5270				3203	188981	196682	21623	77665		4790		30155		20370		33747		14829	10000000	28394	2993	69846	39735	32113		10373	4534	1199	45162	10000000			1196						10271	3549	53158	76781
463	62179				40850	1994	3724				3144	123042	155289	15605	176142		19456		36455		10827		256139		10000000	10000000	63588	4354	21006	3536	34123		6262	8041	3029	46207	7214			3540						5876	2954	6991	11833
464	27627				4377	2391	6771				5339	136635	55893	12293	25714		35202		25241		50130		282967		10000000	35197	25595	2984	28098	12078	9734		1468	2598	1503	48283	10158			1752						31108	12126	37300	11827
465	65237				41978	4571	5875				4485	402540	100015	15617	246476		5025		37178		10134		4996		7401	46195	36647	26539	46233	1886	520992		14299	2197	2267	50760	9989			2367						40269	2323	71414	11099
466	19195				1328	1668	2700				3242	421389	669520	10396	197254		12407		96073		11810		53090		36731	36039	17767	4382	4839	3323	200287		9000	2926	1874	35008	12672			1354						3071	4230	6220	40603
467	263081				30408	3782	3925				3517	175944	29536	65123	49020		50016		14258		12294		86874		1423	36482	13731	17905	24445	14320	125085		2282	1464	3445	103278	6423			1238						11092	19930	41095	15915
468	78629				14917	3150	11581				7150	1045342	383789	10000000	37820		4399		17414		4030		32385		23409	45492	12634	17840	23875	10201	385923		1722	3573	1825	17480	12890			1995						19149	47021	54239	90335
469	1699				57838	5296	5190				2031	380168	185915	79609	124349		2648		6263		65138		192399		13920	21719	99138	4027	4478	4474	115309		16399	1610	1480	51834	4634			3102						5576	7374	63473	36808
470	66396				10460	2062	8981				9691	1063797	380309	81158	65084		31783		22227		6298		192919		16701	14967	22615	78854	3416	5481	202702		6475	1494	1616	65801	8936			2933						16400	16541	44970	21941
471	17320				33111	6259	10798				3605	84096	600400	55646	55052		10151		10279		60106		219019		9290	64013	107749	20648	18536	9159	135520		1591	1831	3384	33149	10000000			3809						58991	25235	67696	6776
472	20021				22547	2465	1334				1830	255637	813531	26014	168517		5051		113671		13569		310261		9629	82622	38714	10314	1849	5831	191521		1433	5631	2871	25861	13598			2268						18573	12834	46192	18560
473	12939				46180	3079	3652				1627	168884	225314	107472	125427		31659		12104		4987		16884		10374	15292	98341	11883	59748	10000000	240768		3684	6966	3558	35801	10000000			1467						19560	4039	75593	17261
474	3089				74035	3056	5480				4807	750553	200645	30694	13123		27474		58231		12973		86595		34416	19655	34366	16723	7112	2875	76285		2861	1695	2592	28815	21178			1232						1790	10319	19938	20252
475	26070				8308	2605	3772				4585	55216	254532	37052	4382		10754		9680		10415		78113		15358	60811	4101	46677	32042	12703	654936		3325	2421	1860	82315	21540			2964						9436	17872	186237	6463
476	141240				2914	2625	5675				2317	604123	126180	37070	204175		36795		13274		18464		61480		8436	61367	22344	4303	11612	3211	136100		3700	3140	1419	5767	24833			2189						7970	4050	2333	66840
477	37276				27838	4591	4241				2321	18448	184480	22111	71395		24341		13206		122163		84273		17978	85521	74144	18734	16592	9201	50167		6889	2458	7547	8497	6014			2788						22382	11171	12735	151502
478	133238				35172	2531	3465				3378	339665	819651	12221	141807		7286		132774		6822		98856		13246	17321	84668	4151	39622	2811	283017		9685	4893	3530	9177	31426			1280						4556	4286	104830	3581
479	28769				25010	3979	5046				1705	242530	446002	19543	341421		28268		49802		8631		26496		38996	27321	207489	10374	4041	4605	150470		6865	2110	1540	94375	18173			1736						6092	4347	69219	16607
480	64551				51018	3263	1462				2293	448042	4396	29591	825103		4958		14080		40644		14480		24431	26323	73284	17969	28737	14957	108430		1509	3538	6753	97631	25842			2211						21118	2659	28121	25145
481	12294				68667	9839	3261				1581	196274	6990	17004	42081		10000000		8105		8467		19474		18977	21301	8242	24316	7007	5640	375987		3022	1555	1907	46416	16430			1240						14730	3471	50186	8897
482	254679				20508	2558	4043				3445	8566	237134	24794	179190		17134		21060		17486		103092		14046	14234	26657	10698	63246	6742	546671		1844	3206	1239	159679	47361			3890						1554	4739	13150	15490
483	5769				1381	3214	4015				2306	40550	33678	18747	72727		1948		21266		18003		30224		8209	18822	24781	2826	60009	12663	912764		7295	2662	2391	7790	10000000			2337						12310	1427	31141	11125
484	70844				25945	2514	4392				2892	92183	123663	15571	213389		10000000		69572		6702		20509		22695	17230	80052	9196	100580	5358	206755		1719	4204	2399	90216	18937			1783						26023	2097	66666	10526
485	88507				20267	3101	2551				2456	84314	477581	10654	102586		5432		98062		63593		94045		51742	39484	109594	5620	94900	6154	82330		8836	2186	1692	21339	21640			1332						3736	5949	45662	17111
486	99938				13419	2750	3052				1542	32003	300316	16314	178873		17117		82845		6755		156149		17419	10000000	5703	2524	23767	9128	215644		3032	4306	2055	15033	25607			2343						21624	9701	84393	68574
487	114259				25097	3978	6605				3275	721373	55204	52468	87422		2262		6203		26149		99172		18954	38112	72413	2148	36560	9614	465917		5860	1469	2025	13271	10639			1449						5221	8252	31497	5852
488	174021				31000	3963	9332				1696	38939	290982	93635	30784		20091		34117		2633		61075		23199	16204	29155	4266	1333	3188	333932		2120	6468	1733	8316	34665			1444						15222	3509	27146	105900
489	265858				53889	6541	1640				6090	172905	161565	18635	150346		4584		11194		7243		13131		15753	31833	63314	4708	11864	5844	1358294		1552	6902	4208	26159	21285			7862						4717	11982	12730	7133
490	10262				51982	1631	2576				3578	70182	1395319	76172	99667		13032		6598		15328		170525		22522	23560	71117	12302	21386	6234	47003		4874	2805	2402	26768	7470			1516						9792	30511	45374	24967
491	60851				57149	2863	13957				3287	65827	510230	70931	13603		18124		9538		24269		116662		16617	30530	30447	3793	75209	6392	405328		2524	2193	2730	56886	22579			1764						2889	23145	45049	50632
492	62331				1797	6755	3218				2052	86957	208689	44742	290310		5960		54383		2251		17400		21762	106111	8032	1761	30424	5405	218591		7874	6219	3699	17278	51367			3239						10019	6162	5904	26996
493	107538				3903	1507	3862				2435	19645	236247	46123	230798		24523		15922		17649		76230		13312	19491	117357	3044	9774	2908	350630		5876	3084	2003	17119	71624			2124						24484	14761	2071	16210
494	31562				3854	4497	5743				4033	852188	898611	34059	12776		11624		50234		18169		168937		41332	47743	8009	6741	20262	12701	217626		5804	4273	5678	55452	25501			3088						26425	12597	12795	30730
495	29403				8021	3650	9922				2852	487633	386571	44065	71370		8133		51619		11306		45187		42234	74608	6082	22771	21957	14215	31689		2608	3665	3717	68838	12878			1819						14396	1434	3729	202623
496	77339				6747	11176	3767				1449	72957	752222	18375	68683		7622		33081		4216		3112		13801	10000000	62295	9332	70677	4173	862180		1698	2276	5698	56472	15280			2382						1284	5201	40679	19642
497	82986				14369	3767	2995				1774	28843	36749	10000000	309711		4960		14835		51465		89710		20735	19695	82097	2316	39905	3060	218981		9081	1633	1297	38953	14482			7896						1343	17533	9527	71501
498	137787				5129	4507	2138				2219	50757	154232	30525	368579		7335		2062		9719		2828		7487	11198	34591	12094	28169	5283	351610		2221	1536	2777	62726	18940			2146						3271	6610	28882	75925
499	304850				11528	4517	3561				13411	182356	356093	18228	108130		9819		34149		34033		42929		31589	49361	49292	2792	3112	3909	719362		4993	2010	1882	2308	46986			1327						14250	2820	27053	2283
500	29735				26985	3181	3242				2226	159657	74541	18710	21335		9794		6830		2321		116138		6101	65400	27857	1722	8801	9655	658452		2095	3560	3215	52090	26373			1772						17487	5123	73922	31105
[truncated: 51 more columns]
